# Supplementary material
Source: PubMed Central journal article supplement (PMC4086945)
Supplement: NIHMS601620-supplement-supplemental_table_1.pdf [file NIHMS601620-supplement-supplemental_table_1.pdf]

| GSEA persister                 | SIZE | ES         | NES       | NOM p-val  |
|--------------------------------|------|------------|-----------|------------|
| KOBAYASHI_EGFR_SIGNALING_24HF  | 91   | 0.6158914  | 1.6774119 | 0          |
| PODAR_RESPONSE_TO_ADAPHOSTII   | 133  | 0.5725425  | 1.5245929 | 0          |
| KIM_MYC_AMPLIFICATION_TARGET   | 64   | 0.54878587 | 1.5159117 | 0          |
| KEGG_PHOSPHATIDYLINOSITOL_SIG  | 67   | 0.5428106  | 1.5079663 | 0.02469136 |
| CASORELLI_ACUTE_PROMYELOCYTIC  | 157  | 0.5315123  | 1.5032824 | 0          |
| GARGALOVIC_RESPONSE_TO_OXIDI   | 68   | 0.60288537 | 1.4995856 | 0          |
| RUIZ_TNC_TARGETS_UP            | 141  | 0.5757926  | 1.4893037 | 0          |
| KINSEY_TARGETS_OF_EWSR1_FLII_F | 279  | 0.5749149  | 1.4852284 | 0          |
| ODONNELL_TARGETS_OF_MYC_AND    | 75   | 0.5468729  | 1.482517  | 0          |
| KEGG_AXON_GUIDANCE             | 127  | 0.49388975 | 1.4782517 | 0          |
| KEGG_ERBB_SIGNALING_PATHWAY    | 85   | 0.53274053 | 1.476202  | 0.05060729 |
| CHEN_LVAD_SUPPORT_OF_FAILING   | 96   | 0.50175303 | 1.4699547 | 0          |
| PEREZ_TP53_AND_TP63_TARGETS    | 182  | 0.5070127  | 1.4665049 | 0          |
| REN_ALVEOLAR_RHABDOMYOSARCO    | 95   | 0.5072178  | 1.4482498 | 0          |
| RAMASWAMY_METASTASIS_DN        | 57   | 0.53284335 | 1.4450008 | 0.02845529 |
| PEREZ_TP63_TARGETS             | 313  | 0.48958525 | 1.4428053 | 0          |
| RAGHAVACHARI_PLATELET_SPECIFIC | 66   | 0.46943298 | 1.4421027 | 0.02729045 |
| KONDO_EZH2_TARGETS             | 127  | 0.48753598 | 1.4404864 | 0          |
| YAO_TEMPORAL_RESPONSE_TO_PR    | 62   | 0.5411703  | 1.4343483 | 0.01976285 |
| FRIDMAN_SENESCENCE_UP          | 74   | 0.45868224 | 1.4332204 | 0          |
| ONDER_CDH1_TARGETS_1_UP        | 121  | 0.5146014  | 1.4303304 | 0          |
| TONKS_TARGETS_OF_RUNX1_RUNX    | 169  | 0.48695454 | 1.4272393 | 0          |
| KEGG_JAK_STAT_SIGNALING_PATHV  | 151  | 0.49312404 | 1.4251015 | 0.10606061 |
| BASSO_CD40_SIGNALING_DN        | 62   | 0.5220066  | 1.4244918 | 0          |
| SHEDDEN_LUNG_CANCER_GOOD_SI    | 176  | 0.48414    | 1.4195551 | 0          |
| MANALO_HYPOXIA_UP              | 188  | 0.45177537 | 1.4195414 | 0.02380952 |
| HADDAD_B_LYMPHOCYTE_PROGEN     | 260  | 0.52739084 | 1.4188768 | 0.05357143 |
| TAKEDA_TARGETS_OF_NUP98_HOX    | 127  | 0.4857181  | 1.417315  | 0          |
| MORI_PRE_BI_LYMPHOCYTE_DN      | 58   | 0.5139085  | 1.4162353 | 0.01996008 |
| RIGGI_EWING_SARCOMA_PROGENI    | 169  | 0.46557203 | 1.412686  | 0.02631579 |
| UDAYAKUMAR_MED1_TARGETS_DN     | 224  | 0.4565625  | 1.407881  | 0.04761905 |
| BASSO_HAIRY_CELL_LEUKEMIA_DN   | 80   | 0.48023602 | 1.4075651 | 0.05175984 |
| GUTIERREZ_CHRONIC_LYMPHOCYTI   | 52   | 0.48992756 | 1.4039485 | 0          |
| HOSHIDA_LIVER_CANCER_LATE_REC  | 54   | 0.4463246  | 1.4028294 | 0          |
| KIM_MYCN_AMPLIFICATION_TARGE   | 78   | 0.5070885  | 1.3984165 | 0.01984127 |
| RICKMAN_TUMOR_DIFFERENTIATED   | 95   | 0.47890902 | 1.3954363 | 0          |
| JISON_SICKLE_CELL_DISEASE_DN   | 155  | 0.38862175 | 1.394877  | 0          |
| REACTOME_G_ALPHA_12_13_SIGNA   | 54   | 0.47326234 | 1.3939317 | 0          |
| YAGI_AML_WITH_T_9_11_TRANSLO   | 123  | 0.44005904 | 1.3917896 | 0.07326733 |
| REACTOME_SIGNALING_BY_PDGF     | 62   | 0.45207527 | 1.3891764 | 0          |

|                                |     |            |           |            |
|--------------------------------|-----|------------|-----------|------------|
| YAO_TEMPORAL_RESPONSE_TO_PR    | 58  | 0.50059855 | 1.3824391 | 0.05964215 |
| KEGG_B_CELL_RECEPTOR_SIGNALIN  | 71  | 0.47322947 | 1.382014  | 0.09760957 |
| FRASOR_RESPONSE_TO ESTRADIOL   | 59  | 0.5148646  | 1.3796513 | 0          |
| YAO_HOXA10_TARGETS_VIA_PROGE   | 70  | 0.44908115 | 1.369926  | 0.02453988 |
| VECCHI_GASTRIC_CANCER_ADVANC   | 153 | 0.40948686 | 1.3698292 | 0.027833   |
| LIU_SOX4_TARGETS_UP            | 124 | 0.508156   | 1.3686172 | 0.02524272 |
| CAIRO_LIVER_DEVELOPMENT_UP     | 142 | 0.40611255 | 1.3671103 | 0          |
| ADDYA_ERYTHROID_DIFFERENTIATI  | 61  | 0.4657917  | 1.3670291 | 0.1734104  |
| MITSIADES_RESPONSE_TO_APLIDIN  | 396 | 0.44485784 | 1.3655837 | 0          |
| AKL_HTLV1_INFECTION_DN         | 61  | 0.498177   | 1.3646672 | 0.0268714  |
| WANG_HCP_PROSTATE_CANCER       | 72  | 0.48395416 | 1.3626598 | 0.02702703 |
| KEGG_RIG_I_LIKE_RECEPTOR_SIGNA | 65  | 0.43737304 | 1.3579061 | 0.0491453  |
| SMID_BREAST_CANCER_LUMINAL_A   | 84  | 0.4924884  | 1.3575382 | 0.03853956 |
| LIU_VMYB_TARGETS_UP            | 116 | 0.44444662 | 1.3511465 | 0.07444668 |
| ODONNELL_TFRC_TARGETS_UP       | 377 | 0.40345985 | 1.3451083 | 0          |
| KEGG_T_CELL_RECEPTOR_SIGNALIN  | 107 | 0.4856167  | 1.3417171 | 0.10580913 |
| WAMUNYOKOLI_OVARIAN_CANCER     | 57  | 0.5168954  | 1.3414065 | 0.05432596 |
| BOYLAN_MULTIPLE_MYELOMA_C_D    | 210 | 0.3771994  | 1.3407238 | 0.02862986 |
| BOYLAN_MULTIPLE_MYELOMA_D_C    | 59  | 0.42097592 | 1.3388982 | 0          |
| REACTOME_TRKA_SIGNALLING_FRO   | 95  | 0.44174373 | 1.3376374 | 0.1018711  |
| HELLER_HDAC_TARGETS_SILENCED_  | 390 | 0.4176472  | 1.3358787 | 0.02636917 |
| SU_PANCREAS                    | 51  | 0.5102027  | 1.3358334 | 0.09939148 |
| REACTOME_RHO_GTPASE_CYCLE      | 112 | 0.40499625 | 1.334832  | 0.075      |
| MOLENAAR_TARGETS_OF_CCND1_A    | 51  | 0.49148968 | 1.334731  | 0.02514507 |
| PICCALUGA_ANGIOIMMUNOBLASTI    | 113 | 0.54786867 | 1.3345056 | 0.03359684 |
| RODRIGUES_THYROID_CARCINOMA    | 64  | 0.49674913 | 1.3327749 | 0.054      |
| MULLIGHAN_NPM1_MUTATED_SIGI    | 124 | 0.43127728 | 1.3315524 | 0          |
| BILD_HRAS_ONCOGENIC_SIGNATUR   | 231 | 0.42058337 | 1.3281891 | 0.13793103 |
| TARTE_PLASMA_CELL_VS_PLASMAB   | 370 | 0.38418844 | 1.3222635 | 0          |
| POOLA_INVASIVE_BREAST_CANCER   | 130 | 0.45643428 | 1.3215894 | 0.09387755 |
| MARTORIATI_MDM4_TARGETS_NEL    | 70  | 0.47038174 | 1.3215454 | 0.12704918 |
| BILD_E2F3_ONCOGENIC_SIGNATURI  | 213 | 0.4098842  | 1.3209893 | 0.09645669 |
| GAUSSMANN_MLL_AF4_FUSION_TA    | 130 | 0.4394639  | 1.3201853 | 0          |
| AMBROSINI_FLAVOPIRIDOL_TREATN  | 99  | 0.4171646  | 1.3170831 | 0          |
| KEGG_CHRONIC_MYELOID_LEUKEM    | 72  | 0.46137348 | 1.3168845 | 0.18525897 |
| MOHANKUMAR_TLX1_TARGETS_DN     | 141 | 0.3956353  | 1.316461  | 0          |
| BERTUCCI_MEDULLARY_VS_DUCTAL   | 144 | 0.43593678 | 1.3129913 | 0.03258656 |
| SENGUPTA_EBNA1_ANTICORRELATE   | 142 | 0.55239195 | 1.3116581 | 0.16458334 |
| ZHANG_RESPONSE_TO_IKK_INHIBIT  | 200 | 0.3990992  | 1.3113973 | 0.07383966 |
| ACEVEDO_LIVER_CANCER_WITH_H3   | 101 | 0.4169172  | 1.3097173 | 0.07756814 |
| HELLER_HDAC_TARGETS_UP         | 266 | 0.46568292 | 1.30689   | 0          |

|                               |     |            |           |            |
|-------------------------------|-----|------------|-----------|------------|
| WANG_CLIM2_TARGETS_UP         | 224 | 0.42862147 | 1.3060523 | 0.07453416 |
| ZHOU_INFLAMMATORY_RESPONSE_   | 460 | 0.35298988 | 1.3020673 | 0          |
| FULCHER_INFLAMMATORY_RESPON   | 400 | 0.4170444  | 1.3011527 | 0.02642277 |
| DEURIG_T_CELL_PROLYMPHOCYTIC  | 286 | 0.40285972 | 1.3001875 | 0.09919028 |
| KEGG_ACUTE_MYELOID_LEUKEMIA   | 56  | 0.49770784 | 1.2996211 | 0.07322176 |
| BASAKI_YBX1_TARGETS_DN        | 325 | 0.43127054 | 1.2995566 | 0.03455285 |
| KIM_WT1_TARGETS_12HR_UP       | 142 | 0.44510192 | 1.2982161 | 0.11064718 |
| LAIHO_COLORECTAL_CANCER_SERR. | 76  | 0.49898133 | 1.2981821 | 0.03265306 |
| WANG_SMARCE1_TARGETS_UP       | 155 | 0.39235464 | 1.2968512 | 0.04624277 |
| ELVIDGE_HYPOXIA_UP            | 149 | 0.43090093 | 1.2965916 | 0.14884695 |
| BOYLAN_MULTIPLE_MYELOMA_PCA   | 75  | 0.43387312 | 1.2945749 | 0.128      |
| KEGG_FOCAL_ADHESION           | 189 | 0.3852044  | 1.292666  | 0.0501002  |
| KEGG_OLFACTORY_TRANSDUCTION   | 114 | 0.40262318 | 1.2922213 | 0.20281124 |
| KEGG_VEGF_SIGNALING_PATHWAY   | 71  | 0.47846046 | 1.2894677 | 0.10251046 |
| GRABARCZYK_BCL11B_TARGETS_DN  | 51  | 0.41557428 | 1.288305  | 0.07436399 |
| KEGG_NEUROACTIVE_LIGAND_RECE  | 252 | 0.37908873 | 1.2865744 | 0.11340206 |
| LIAN_LIPA_TARGETS_6M          | 64  | 0.44594964 | 1.2855456 | 0.02610442 |
| KEGG_TOLL_LIKE_RECEPTOR_SIGNA | 98  | 0.4477897  | 1.2822225 | 0.10560345 |
| REACTOME_DOWNSTREAM_EVENTS    | 405 | 0.3637825  | 1.2821368 | 0.05154639 |
| REACTOME_CELL_CELL_ADHESION_  | 55  | 0.41442513 | 1.2820818 | 0.07768925 |
| LENAOUR_DENDRITIC_CELL_MATUR  | 94  | 0.40147325 | 1.2796301 | 0.07070707 |
| KEGG_CHEMOKINE_SIGNALING_PAT  | 173 | 0.4084638  | 1.2795932 | 0.1120332  |
| KEGG_LEUKOCYTE_TRANSENDOTHE   | 108 | 0.40742838 | 1.2792054 | 0.04572565 |
| LIU_CMYB_TARGETS_UP           | 149 | 0.42893252 | 1.2772199 | 0.10470086 |
| RODRIGUES_DCC_TARGETS_DN      | 109 | 0.48206672 | 1.2766842 | 0.10805501 |
| MULLIGHAN_NPM1_SIGNATURE_3_   | 313 | 0.3692032  | 1.2761894 | 0          |
| REACTOME_SIGNALLING_BY_NGF    | 206 | 0.41689014 | 1.2745504 | 0.17052631 |
| HORIUCHI_WTAP_TARGETS_UP      | 275 | 0.39906043 | 1.2726916 | 0.07662083 |
| KEGG_ENDOMETRIAL_CANCER       | 51  | 0.46219844 | 1.2719004 | 0.10470086 |
| DAVICIONI_TARGETS_OF_PAX_FOXC | 234 | 0.35651743 | 1.2714262 | 0.05060729 |
| LU_IL4_SIGNALING              | 61  | 0.40127    | 1.2705237 | 0.0981964  |
| TAKEDA_TARGETS_OF_NUP98_HOX.  | 155 | 0.3914002  | 1.2701629 | 0.02692308 |
| RAMALHO_STEMNESS_DN           | 64  | 0.4999636  | 1.2687471 | 0.17336152 |
| YAO_TEMPORAL_RESPONSE_TO_PR   | 65  | 0.43058753 | 1.267184  | 0.03238867 |
| LEE_DIFFERENTIATING_T_LYMPHOC | 122 | 0.5244807  | 1.2642219 | 0.3995943  |
| REACTOME_G_ALPHA_S_SIGNALLIN  | 118 | 0.4022577  | 1.2636833 | 0.07755102 |
| REACTOME_NCAM_SIGNALING_FOR   | 65  | 0.4423553  | 1.2613224 | 0.15560167 |
| JAEGER_METASTASIS_DN          | 242 | 0.38337627 | 1.2601357 | 0.09859155 |
| TONKS_TARGETS_OF_RUNX1_RUNX   | 149 | 0.4121514  | 1.2589469 | 0.09879033 |
| KEGG_PANCREATIC_CANCER        | 69  | 0.4490533  | 1.2589389 | 0.2417154  |
| GARGALOVIC_RESPONSE_TO_OXIDI  | 118 | 0.4351096  | 1.2560349 | 0.21568628 |

|                                |     |            |           |            |
|--------------------------------|-----|------------|-----------|------------|
| RODRIGUES_NTN1_TARGETS_DN      | 148 | 0.40269896 | 1.2547984 | 0.10294118 |
| KEGG_REGULATION_OF_ACTIN_CYT   | 198 | 0.372426   | 1.2547804 | 0.13429752 |
| ROSS_AML_WITH_PML_RARA_FUSIC   | 73  | 0.43374562 | 1.2523332 | 0.06860707 |
| REACTOME_PHASE_1_FUNCTIONALI   | 66  | 0.4536945  | 1.252205  | 0.1884058  |
| KEGG_NATURAL_KILLER_CELL_MEDI  | 129 | 0.41163868 | 1.2512742 | 0.3153527  |
| BROWNE_HCMV_INFECTION_8HR_U    | 99  | 0.4016118  | 1.2503346 | 0.07254902 |
| CREIGHTON_ENDOCRINE_THERAPY_   | 421 | 0.3965528  | 1.2479771 | 0.09760957 |
| REACTOME_CELL_DEATH_SIGNALLIN  | 59  | 0.46463647 | 1.2473775 | 0.11561866 |
| MCLACHLAN_DENTAL_CARIES_DN     | 227 | 0.3608665  | 1.2448943 | 0.10272536 |
| SENESE_HDAC1_TARGETS_DN        | 208 | 0.3674892  | 1.2444957 | 0.04968944 |
| SMID_BREAST_CANCER_RELAPSE_IN  | 88  | 0.45086023 | 1.2440289 | 0.10309278 |
| ODONNELL_METASTASIS_UP         | 77  | 0.4432743  | 1.2408775 | 0.16837782 |
| CHANDRAN_METASTASIS_DN         | 85  | 0.39745462 | 1.240782  | 0.14020619 |
| CHEBOTAEV_GR_TARGETS_DN        | 105 | 0.44063678 | 1.2407697 | 0.09861933 |
| TAVAZOIE_METASTASIS            | 98  | 0.42072836 | 1.2398747 | 0.15445544 |
| MARSON_FOXP3_TARGETS_UP        | 53  | 0.4816155  | 1.2376312 | 0.24116424 |
| LIAN_LIPA_TARGETS_3M           | 52  | 0.42937717 | 1.2375363 | 0.08151093 |
| TURASHVILI_BREAST_LOBULAR_CAR  | 60  | 0.4574188  | 1.2373856 | 0.07072692 |
| KEGG_PATHWAYS_IN_CANCER        | 315 | 0.3583355  | 1.2362479 | 0.16232465 |
| ST_INTEGRIN_SIGNALING_PATHWAY  | 77  | 0.40199038 | 1.2352307 | 0.1018711  |
| BOYAULT_LIVER_CANCER_SUBCLASS  | 104 | 0.38319013 | 1.2350473 | 0.1362764  |
| WANG_PROSTATE_CANCER_ANDRO     | 59  | 0.39996722 | 1.234572  | 0.13333334 |
| KEGG_GAP_JUNCTION              | 77  | 0.41051733 | 1.2345402 | 0.15430862 |
| VERHAAK_AML_WITH_NPM1_MUT/     | 225 | 0.39160678 | 1.2341539 | 0.11405295 |
| OSMAN_BLADDER_CANCER_DN        | 347 | 0.38591516 | 1.232514  | 0.0987395  |
| ONDER_CDH1_TARGETS_3_DN        | 52  | 0.42267764 | 1.232291  | 0.12195122 |
| REACTOME_PLATELET_ACTIVATION_  | 56  | 0.43164802 | 1.2312487 | 0.17943548 |
| STARK_PREFRONTAL_CORTEX_22Q1   | 157 | 0.42304182 | 1.2308868 | 0.11287129 |
| DANG_REGULATED_BY_MYC_DN       | 230 | 0.36733833 | 1.2298362 | 0.13374485 |
| BROWNE_HCMV_INFECTION_20HR_    | 217 | 0.34533653 | 1.229301  | 0.07361963 |
| CHEN_HOXA5_TARGETS_9HR_UP      | 194 | 0.48807135 | 1.2288975 | 0.17738791 |
| ELVIDGE_HYPOXIA_BY_DMOG_UP     | 114 | 0.40861934 | 1.2276644 | 0.22362868 |
| THEILGAARD_NEUTROPHIL_AT_SKIN  | 212 | 0.3946743  | 1.2248803 | 0.21255061 |
| IWANAGA_CARCIANOGENESIS_BY_KR  | 277 | 0.3495528  | 1.2248042 | 0.09683795 |
| VANTVEER_BREAST_CANCER_ESR1_   | 123 | 0.3773309  | 1.2232652 | 0.0473251  |
| IVANOVA_HEMATOPOIESIS_STEM_C   | 76  | 0.4080925  | 1.2224627 | 0.07039338 |
| HOOI_ST7_TARGETS_DN            | 99  | 0.42153716 | 1.2220458 | 0.18410853 |
| LIU_PROSTATE_CANCER_DN         | 423 | 0.33689776 | 1.2215215 | 0.046      |
| LEE_LIVER_CANCER_CIPROFIBRATE_ | 57  | 0.44340593 | 1.2207477 | 0.17671518 |
| TSAI_RESPONSE_TO_IONIZING_RAD  | 116 | 0.3662097  | 1.2207059 | 0.10272536 |
| KEGG_FC_EPSILON_RI_SIGNALING_F | 75  | 0.42997625 | 1.2203802 | 0.18163265 |

|                               |     |            |           |            |
|-------------------------------|-----|------------|-----------|------------|
| VERHAAK_AML_WITH_NPM1_MUT/    | 172 | 0.3127978  | 1.2203654 | 0.02755906 |
| HUPER_BREAST_BASAL_VS_LUMINA  | 51  | 0.3954108  | 1.2201629 | 0.178      |
| NIKOLSKY_MUTATED_AND_AMPLIFI  | 78  | 0.39321968 | 1.219867  | 0.01972387 |
| RIGGI_EWING_SARCOMA_PROGENI   | 382 | 0.35616276 | 1.2181606 | 0.03950104 |
| YAGI_AML_WITH_T_8_21_TRANSLO  | 334 | 0.36494446 | 1.2177687 | 0.08315565 |
| DAZARD_RESPONSE_TO_UV_SCC_DI  | 87  | 0.4601344  | 1.2166588 | 0.20272905 |
| PASQUALUCCI_LYMPHOMA_BY_GC_   | 136 | 0.43097225 | 1.216432  | 0.09861933 |
| MULLIGHAN_NPM1_MUTATED_SIGI   | 251 | 0.3471685  | 1.2154729 | 0.0368217  |
| GRAHAM_CML QUIESCENT_VS_NOI   | 54  | 0.42121887 | 1.2129577 | 0.12871288 |
| KEGG_NOD_LIKE_RECEPTOR_SIGNA  | 51  | 0.37888658 | 1.2119392 | 0.09072978 |
| LINDGREN_BLADDER_CANCER_CLUS  | 124 | 0.41555423 | 1.2119381 | 0.11218569 |
| KEGG_MELANOMA                 | 71  | 0.45083886 | 1.2108351 | 0.25477707 |
| ZHOU_INFLAMMATORY_RESPONSE_   | 376 | 0.33106548 | 1.210176  | 0          |
| SMIRNOV_CIRCULATING_ENDOTHEL  | 150 | 0.4338302  | 1.2087048 | 0.13519314 |
| HOEBEKE_LYMPHOID_STEM_CELL_U  | 84  | 0.46709928 | 1.208143  | 0.14007781 |
| CHARAFE_BREAST_CANCER_LUMINA/ | 329 | 0.4281158  | 1.2078655 | 0.16993465 |
| VECCHI_GASTRIC_CANCER_EARLY_D | 321 | 0.36475363 | 1.2073817 | 0.0515873  |
| ENK_UV_RESPONSE_EPIDERMIS_DN  | 477 | 0.3550995  | 1.2069579 | 0.09760957 |
| KEGG_NON_SMALL_CELL_LUNG_CA   | 52  | 0.4677049  | 1.2058402 | 0.16309012 |
| ZHOU_INFLAMMATORY_RESPONSE_   | 421 | 0.32994333 | 1.2054284 | 0.04831933 |
| DACOSTA_UV_RESPONSE_VIA_ERCC  | 53  | 0.47512308 | 1.2050289 | 0.24520256 |
| ZHONG_RESPONSE_TO_AZACITIDINI | 174 | 0.40474108 | 1.2043792 | 0.10515022 |
| KEGG_APOPTOSIS                | 82  | 0.40512478 | 1.2039039 | 0.20682302 |
| STEARMAN_LUNG_CANCER_EARLY_   | 103 | 0.37335765 | 1.2035456 | 0.1284585  |
| ELVIDGE_HIF1A_TARGETS_DN      | 78  | 0.4074502  | 1.201559  | 0.18737271 |
| MISSIAGLIA_REGULATED_BY_METH  | 92  | 0.4518109  | 1.2012372 | 0.12311015 |
| JAATINEN_HEMATOPOIETIC_STEM_  | 209 | 0.41921663 | 1.1995181 | 0.23493975 |
| SUNG_METASTASIS_STROMA_UP     | 99  | 0.35110122 | 1.1985117 | 0.1194605  |
| KAN_RESPONSE_TO_ARSENIC_TRIO  | 113 | 0.411272   | 1.1975267 | 0.32156864 |
| ACEVEDO_LIVER_CANCER_WITH_H3  | 161 | 0.35052255 | 1.1965338 | 0.074      |
| BROWNE_HCMV_INFECTION_12HR_   | 89  | 0.3735143  | 1.194533  | 0.17681728 |
| KIM_WT1_TARGETS_UP            | 193 | 0.36727235 | 1.1942621 | 0.24110672 |
| KEGG_MAPK_SIGNALING_PATHWAY   | 256 | 0.38835284 | 1.1920052 | 0.10515022 |
| HESS_TARGETS_OF_HOXA9_AND_M   | 66  | 0.3858265  | 1.1891128 | 0.18255578 |
| SCHLESINGER_METHYLATED_DE_NC  | 84  | 0.42997482 | 1.1877693 | 0.26680243 |
| KYNG_DNA_DAMAGE_DN            | 96  | 0.38289332 | 1.1868193 | 0.04518664 |
| KEGG_SMALL_CELL_LUNG_CANCER   | 82  | 0.42057368 | 1.1859946 | 0.18074656 |
| SHEDDEN_LUNG_CANCER_GOOD_SI   | 62  | 0.48675415 | 1.185534  | 0.14613779 |
| MOREAUX_B_LYMPHOCYTE_MATUF    | 68  | 0.43913424 | 1.1850774 | 0.18125    |
| DAVICIONI_MOLECULAR_ARMS_VS_  | 293 | 0.35593575 | 1.1837449 | 0.13147411 |
| ONDER_CDH1_TARGETS_2_UP       | 223 | 0.34410807 | 1.1833997 | 0.23809524 |

|                               |     |            |           |            |
|-------------------------------|-----|------------|-----------|------------|
| ROPERO_HDAC2_TARGETS          | 100 | 0.42586043 | 1.1827534 | 0.10583153 |
| GAUSSMANN_MLL_AF4_FUSION_TA   | 154 | 0.33767113 | 1.1826043 | 0.11332008 |
| BROWNE_HCMV_INFECTION_1HR_U   | 60  | 0.4109765  | 1.1820824 | 0.26877472 |
| RASHI_RESPONSE_TO_IONIZING_RA | 110 | 0.3868224  | 1.1817733 | 0.15118791 |
| BIOCARTA_MAPK_PATHWAY         | 85  | 0.41575593 | 1.1809988 | 0.12340426 |
| REACTOME_AXON_GUIDANCE        | 153 | 0.34086478 | 1.1801571 | 0.08163265 |
| XU_GH1_AUTOCRINE_TARGETS_DN   | 110 | 0.33849064 | 1.1799335 | 0.0545809  |
| SASSON_RESPONSE_TO_FORSKOLIN  | 67  | 0.37356463 | 1.1797415 | 0.1391129  |
| LIN_SILENCED_BY_TUMOR_MICROE  | 99  | 0.37641522 | 1.1770471 | 0.22520661 |
| KEGG_WNT_SIGNALING_PATHWAY    | 144 | 0.3987847  | 1.1768159 | 0.17181467 |
| VANHARANTA_UTERINE_FIBROID_D  | 61  | 0.4154877  | 1.173141  | 0.18871595 |
| KEGG_PROSTATE_CANCER          | 87  | 0.3740779  | 1.1722951 | 0.20866142 |
| DOUGLAS_BMI1_TARGETS_DN       | 273 | 0.386121   | 1.1722437 | 0.25651303 |
| KEGG_ECM_RECEPTOR_INTERACTIO  | 81  | 0.35844445 | 1.1679835 | 0.17886178 |
| GRAHAM_NORMAL QUIESCENT_VS_   | 60  | 0.4328446  | 1.1668861 | 0.2946768  |
| NAGASHIMA_EGF_SIGNALING_UP    | 52  | 0.4161244  | 1.1666657 | 0.2771855  |
| YAUCH_HEDGEHOG_SIGNALING_PA   | 200 | 0.2982796  | 1.1660457 | 0.06517312 |
| KEGG_GNRH_SIGNALING_PATHWAY   | 97  | 0.38695678 | 1.1652427 | 0.2        |
| KEGG_CALCIUM_SIGNALING_PATHV  | 171 | 0.32541904 | 1.1636158 | 0.14968815 |
| ELVIDGE_HIF1A_AND_HIF2A_TARGE | 87  | 0.38025445 | 1.1628108 | 0.24       |
| ALCALAY_AML_BY_NPM1_LOCALIZA  | 131 | 0.3315463  | 1.1610203 | 0.12450593 |
| BROWNE_HCMV_INFECTION_6HR_C   | 149 | 0.39014378 | 1.1603156 | 0.20467836 |
| GAL_LEUKEMIC_STEM_CELL_UP     | 118 | 0.34952947 | 1.1581453 | 0.11045365 |
| LEE_NEURAL_CREST_STEM_CELL_DN | 113 | 0.35361084 | 1.157332  | 0.17330678 |
| GENTILE_UV_HIGH_DOSE_DN       | 229 | 0.40066326 | 1.1555562 | 0.15280464 |
| AMIT_EGF_RESPONSE_120_HELA    | 60  | 0.40779173 | 1.1526644 | 0.1440501  |
| SWEET_LUNG_CANCER_KRAS_DN     | 375 | 0.32272097 | 1.1516347 | 0.15682282 |
| REACTOME_TRANSMISSION_ACROS   | 128 | 0.37608746 | 1.1505253 | 0.27484143 |
| BIOCARTA_NFAT_PATHWAY         | 53  | 0.4140322  | 1.150463  | 0.19277108 |
| GU_PDEF_TARGETS_UP            | 68  | 0.35580167 | 1.150355  | 0.14734773 |
| BIOCARTA_PPARA_PATHWAY        | 53  | 0.38170183 | 1.1497239 | 0.18548387 |
| DACOSTA_UV_RESPONSE_VIA_ERCC  | 60  | 0.44168228 | 1.1491199 | 0.16764133 |
| LINDGREN_BLADDER_CANCER_CLUS  | 361 | 0.34920135 | 1.1486058 | 0.3299595  |
| THUM_SYSTOLIC_HEART_FAILURE_C | 204 | 0.37255386 | 1.1485217 | 0.20558882 |
| KEGG_HEDGEHOG_SIGNALING_PATI  | 53  | 0.3965562  | 1.1465054 | 0.30664062 |
| KEGG_NEUROTROPHIN_SIGNALING_  | 122 | 0.36269733 | 1.14565   | 0.20454545 |
| MCLACHLAN_DENTAL_CARIES_UP    | 200 | 0.33512148 | 1.145268  | 0.10315789 |
| BROCKE_APOPTOSIS_REVERSED_BY_ | 129 | 0.3580366  | 1.141388  | 0.29961088 |
| KEGG_GLIOMA                   | 63  | 0.38326266 | 1.1347499 | 0.23175965 |
| CADWELL_ATG16L1_TARGETS_UP    | 77  | 0.3463892  | 1.1329441 | 0.16666667 |
| MASSARWEH_TAMOXIFEN_RESISTA   | 216 | 0.32267812 | 1.1310253 | 0.13235295 |

|                                |     |            |           |            |
|--------------------------------|-----|------------|-----------|------------|
| BROWNE_HCMV_INFECTION_30MIN    | 52  | 0.3929653  | 1.1301934 | 0.23140496 |
| LEE_LIVER_CANCER_CIPROFIBRATE_ | 64  | 0.41181433 | 1.1284692 | 0.23541667 |
| SASSON_RESPONSE_TO_GONADOTF    | 68  | 0.34594    | 1.1273862 | 0.2387755  |
| BROWNE_HCMV_INFECTION_10HR_    | 96  | 0.3505007  | 1.126895  | 0.22266401 |
| VART_KSHV_INFECTION_ANGIOGEN   | 161 | 0.3352563  | 1.1267769 | 0.28542915 |
| RODRIGUES_THYROID_CARCINOMA_   | 451 | 0.31601313 | 1.1265513 | 0.22406639 |
| KAYO_CALORIE_RESTRICTION_MUSC  | 66  | 0.36511657 | 1.1237798 | 0.20328543 |
| LEE_LIVER_CANCER_MYC_DN        | 57  | 0.3844479  | 1.1237129 | 0.2851485  |
| ZHAN_MULTIPLE_MYELOMA_CD1_A    | 74  | 0.3861021  | 1.1230007 | 0.2548638  |
| HAHTOLA_MYCOSIS_FUNGOIDES_CI   | 62  | 0.38715437 | 1.1221932 | 0.26987448 |
| REACTOME_P75_NTR_RECEPTOR_M    | 80  | 0.40357912 | 1.1217499 | 0.22453223 |
| DAZARD_RESPONSE_TO_UV_NHEK_    | 234 | 0.45494655 | 1.1191416 | 0.35992217 |
| SENESE_HDAC1_AND_HDAC2_TARG    | 206 | 0.29841807 | 1.1185673 | 0.13333334 |
| GRAHAM_CML_DIVIDING_VS_NORN    | 88  | 0.3654781  | 1.1179024 | 0.24609375 |
| YAGI_AML_FAB_MARKERS           | 179 | 0.3282183  | 1.1169182 | 0.15714286 |
| KEGG_ENDOCYTOSIS               | 158 | 0.3748256  | 1.1167022 | 0.27136752 |
| KEGG_BASAL_CELL_CARCINOMA      | 53  | 0.38822937 | 1.1158081 | 0.2827443  |
| XU_HGF_TARGETS_REPRESSED_BY_   | 71  | 0.37878585 | 1.1152025 | 0.24190065 |
| TAKEDA_TARGETS_OF_NUP98_HOX.   | 171 | 0.31649512 | 1.114698  | 0.21062993 |
| KEGG_INSULIN_SIGNALING_PATHW.  | 131 | 0.37392858 | 1.1125729 | 0.19870411 |
| BROWNE_HCMV_INFECTION_6HR_U    | 64  | 0.35099256 | 1.1116118 | 0.22268042 |
| WAMUNYOKOLI_OVARIAN_CANCER_    | 168 | 0.41026217 | 1.1112523 | 0.30710173 |
| GRADE_COLON_AND_RECTAL_CANC    | 76  | 0.3745549  | 1.1106257 | 0.21703854 |
| KEGG_FC_GAMMA_R_MEDIATED_P     | 87  | 0.36500072 | 1.1105838 | 0.24074075 |
| REACTOME_TOLL_LIKE_RECEPTOR_   | 55  | 0.4099486  | 1.10832   | 0.2262931  |
| BONOME_OVARIAN_CANCER_SURV     | 457 | 0.35076845 | 1.1078565 | 0.21505377 |
| WEIGEL_OXIDATIVE_STRESS_BY_HN  | 53  | 0.4172019  | 1.1066067 | 0.30607966 |
| KANG_IMMORTALIZED_BY_TERT_DN   | 101 | 0.34828216 | 1.1057116 | 0.2173913  |
| HATADA_METHYLATED_IN_LUNG_C    | 323 | 0.32235232 | 1.1022075 | 0.3109756  |
| BIDUS_METASTASIS_DN            | 131 | 0.40525073 | 1.099161  | 0.19396552 |
| LINDGREN_BLADDER_CANCER_CLUS   | 197 | 0.31677142 | 1.0991374 | 0.26077586 |
| RUTELLA_RESPONSE_TO_HGF_DN     | 213 | 0.34275195 | 1.0965414 | 0.19126819 |
| RICKMAN_TUMOR_DIFFERENTIATED   | 205 | 0.32823905 | 1.0965014 | 0.251938   |
| TONKS_TARGETS_OF_RUNX1_RUNX    | 52  | 0.3955758  | 1.0958911 | 0.21856867 |
| LU_AGING_BRAIN_DN              | 236 | 0.34327164 | 1.0953928 | 0.26223093 |
| AMUNDSON_RESPONSE_TO_ARSEN     | 178 | 0.34234342 | 1.09014   | 0.3806706  |
| STEIN_ESRRA_TARGETS_DN         | 93  | 0.3073778  | 1.089157  | 0.20159681 |
| TURASHVILI_BREAST_LOBULAR_CAR  | 62  | 0.32852843 | 1.0887614 | 0.20283976 |
| BILD_SRC_ONCOGENIC_SIGNATURE   | 55  | 0.42858905 | 1.0882602 | 0.29310346 |
| BLALOCK_ALZHEIMERS_DISEASE_IN  | 358 | 0.28850436 | 1.0880213 | 0.22745901 |
| DOANE_RESPONSE_TO_ANDROGEN_    | 226 | 0.3230206  | 1.0877495 | 0.23260869 |

|                               |     |            |           |            |
|-------------------------------|-----|------------|-----------|------------|
| RUTELLA_RESPONSE_TO_HGF_VS_C  | 230 | 0.3119705  | 1.0873144 | 0.28865978 |
| BROWNE_HCMV_INFECTION_4HR_U   | 53  | 0.38504657 | 1.0857345 | 0.34122288 |
| REACTOME_IRS_RELATED_EVENTS   | 74  | 0.35144776 | 1.0850166 | 0.32304525 |
| KEGG_ARRHYTHMOGENIC_RIGHT_V   | 73  | 0.3336918  | 1.0833889 | 0.3146998  |
| KEGG_LYSOSOME                 | 115 | 0.4522363  | 1.0826173 | 0.31769723 |
| MOREAUX_MULTIPLE_MYELOMA_B    | 348 | 0.3448393  | 1.0793391 | 0.30703625 |
| REACTOME_NEURORANSMITTER_RE   | 82  | 0.34014452 | 1.0792315 | 0.39019188 |
| DAZARD_UV_RESPONSE_CLUSTER_C  | 111 | 0.4601421  | 1.0790933 | 0.38003838 |
| REACTOME_CELL_SURFACE_INTERA  | 94  | 0.354557   | 1.078962  | 0.24901186 |
| HAN_SATB1_TARGETS_DN          | 309 | 0.33785033 | 1.0766716 | 0.38607594 |
| CAIRO_HEPATOBLASTOMA_CLASSES  | 190 | 0.3608829  | 1.0763242 | 0.36460555 |
| IVANOVA_HEMATOPOIESIS_STEM_C  | 73  | 0.33829823 | 1.0751115 | 0.23673469 |
| TAKEDA_TARGETS_OF_NUP98_HOX   | 78  | 0.38613507 | 1.0743943 | 0.38353413 |
| IZADPANAH_STEM_CELL_ADIPOSE_V | 98  | 0.3427729  | 1.073423  | 0.24063116 |
| WANG_LMO4_TARGETS_UP          | 308 | 0.28583038 | 1.0710001 | 0.21663442 |
| HADDAD_T_LYMPHOCYTE_AND_NK    | 75  | 0.3680651  | 1.0688589 | 0.27272728 |
| TAKEDA_TARGETS_OF_NUP98_HOX   | 182 | 0.32860756 | 1.0678092 | 0.28370222 |
| KIM_WT1_TARGETS_8HR_UP        | 157 | 0.32599878 | 1.066548  | 0.3616601  |
| TURASHVILI_BREAST_LOBULAR_CAR | 86  | 0.3458034  | 1.0659101 | 0.39884394 |
| ONDER_CDH1_TARGETS_2_DN       | 432 | 0.29789165 | 1.0655122 | 0.3081511  |
| NIKOLSKY_BREAST_CANCER_20Q12  | 125 | 0.38901845 | 1.0646172 | 0.39751554 |
| SENESE_HDAC1_AND_HDAC2_TARG   | 211 | 0.30037293 | 1.064082  | 0.27494907 |
| WANG_CISPLATIN_RESPONSE_AND   | 131 | 0.36712894 | 1.0600071 | 0.31556502 |
| KEGG_RENAL_CELL_CARCINOMA     | 69  | 0.3714853  | 1.0598243 | 0.4367589  |
| WANG_ESOPHAGUS_CANCER_VS_N    | 81  | 0.4112478  | 1.0589694 | 0.34773663 |
| EBAUER_TARGETS_OF_PAX3_FOXO1  | 189 | 0.31038457 | 1.058596  | 0.37768242 |
| FERREIRA_EWINGS_SARCOMA_UNSP  | 85  | 0.4616447  | 1.0575894 | 0.4904051  |
| HELLER_SILENCED_BY_METHYLATIO | 238 | 0.30179504 | 1.0568818 | 0.36421052 |
| RIGGINS_TAMOXIFEN_RESISTANCE  | 197 | 0.33098996 | 1.0560753 | 0.33587787 |
| BERENJENO_TRANSFORMED_BY_RH   | 337 | 0.3371288  | 1.0537398 | 0.31982943 |
| LE_EGR2_TARGETS_DN            | 96  | 0.33263463 | 1.0528522 | 0.35123968 |
| KEGG_COLORECTAL_CANCER        | 61  | 0.37690282 | 1.0512284 | 0.39138943 |
| MASSARWEH_TAMOXIFEN_RESISTA   | 498 | 0.31207564 | 1.0509264 | 0.2485323  |
| YAGI_AML_WITH_INV_16_TRANSLO  | 389 | 0.27604577 | 1.0502065 | 0.21311475 |
| ONDER_CDH1_SIGNALING_VIA_CTN  | 72  | 0.30167496 | 1.0494354 | 0.3627451  |
| TONKS_TARGETS_OF_RUNX1_RUNX   | 179 | 0.35654694 | 1.0489032 | 0.35607675 |
| THUM_SYSTOLIC_HEART_FAILURE_U | 383 | 0.3374246  | 1.0484829 | 0.25244617 |
| HUTTMANN_B_CLL_POOR_SURVIVA   | 257 | 0.38320005 | 1.0482906 | 0.42616034 |
| LEE_TARGETS_OF_PTCH1_AND_SUF  | 73  | 0.3174769  | 1.0474081 | 0.36956522 |
| TAYLOR_METHYLATED_IN_ACUTE_U  | 62  | 0.3172251  | 1.0463265 | 0.43021032 |
| SCHLOSSER_SERUM_RESPONSE_UP   | 122 | 0.40326366 | 1.0459418 | 0.44906446 |



|                               |     |            |           |            |
|-------------------------------|-----|------------|-----------|------------|
| KEGG_DILATED_CARDIOMYOPATHY   | 89  | 0.32212374 | 1.0444894 | 0.30443975 |
| KEGG_VASCULAR_SMOOTH_MUSCL    | 110 | 0.28405514 | 1.0444667 | 0.31434184 |
| BEIER_GLIOMA_STEM_CELL_DN     | 56  | 0.38491148 | 1.0432105 | 0.4064516  |
| MCCLUNG_CREB1_TARGETS_UP      | 85  | 0.34101045 | 1.0430443 | 0.39569893 |
| MORI_SMALL_PRE_BII_LYMPHOCYT  | 56  | 0.35606205 | 1.0422119 | 0.42094457 |
| SEKI_INFLAMMATORY_RESPONSE_L  | 71  | 0.34854952 | 1.041889  | 0.41598362 |
| REACTOME_REGULATION_OF_LIPID  | 54  | 0.35217595 | 1.0416139 | 0.37575758 |
| ZHANG_BREAST_CANCER_PROGENI   | 125 | 0.329018   | 1.0409758 | 0.40416667 |
| RICKMAN_HEAD_AND_NECK_CANCI   | 85  | 0.28228292 | 1.0399145 | 0.31176472 |
| REACTOME_CENTROSOME_MATUR/    | 64  | 0.37469113 | 1.0393798 | 0.4078675  |
| VART_KSHV_INFECTION_ANGIOGEN  | 131 | 0.31880403 | 1.0381992 | 0.3395445  |
| ROSS_LEUKEMIA_WITH_MLL_FUSIO  | 72  | 0.3246643  | 1.0371605 | 0.3249476  |
| PICCALUGA_ANGIOIMMUNOBLASTIK  | 192 | 0.28367025 | 1.0365236 | 0.35658914 |
| LENAOUR_DENDRITIC_CELL_MATUR  | 88  | 0.33506662 | 1.0363197 | 0.39914164 |
| CHIARADONNA_NEOPLASTIC_TRANS  | 106 | 0.30789673 | 1.0350902 | 0.43796992 |
| ASTON_MAJOR_DEPRESSIVE_DISOR  | 149 | 0.2788244  | 1.0343875 | 0.31712472 |
| CHARAFE_BREAST_CANCER_LUMIN/  | 387 | 0.36847076 | 1.0325224 | 0.4362851  |
| IVANOVA_HEMATOPOIESIS_MATUR   | 85  | 0.34820563 | 1.0323967 | 0.38217822 |
| MCBRYAN_PUBERTAL_BREAST_4_5\  | 225 | 0.2754534  | 1.0302092 | 0.38477802 |
| BROWNE_HCMV_INFECTION_24HR_   | 136 | 0.2870174  | 1.0293595 | 0.37142858 |
| SHAFFER_IRF4_TARGETS_IN_PLASM | 64  | 0.36614472 | 1.0279773 | 0.37044534 |
| NAGASHIMA_NRG1_SIGNALING_UP   | 157 | 0.31716996 | 1.0277357 | 0.2611336  |
| YAO_TEMPORAL_RESPONSE_TO_PR   | 63  | 0.33782175 | 1.0271956 | 0.3814433  |
| BROWNE_HCMV_INFECTION_10HR_   | 52  | 0.37520814 | 1.0266947 | 0.38551858 |
| BROWNE_HCMV_INFECTION_4HR_    | 230 | 0.32830152 | 1.0262395 | 0.44444445 |
| BROWNE_HCMV_INFECTION_18HR_   | 165 | 0.32409585 | 1.0259099 | 0.4328063  |
| FOSTER_INFLAMMATORY_RESPONS   | 134 | 0.30127972 | 1.0249763 | 0.37651822 |
| SANA_TNF_SIGNALING_DN         | 74  | 0.30996063 | 1.0228864 | 0.4939759  |
| OKUMURA_INFLAMMATORY_RESPC    | 167 | 0.2740544  | 1.0220658 | 0.3936842  |
| REACTOME_SEMAPHORIN_INTERAC   | 63  | 0.30061415 | 1.0218022 | 0.31610337 |
| BASSO_CD40_SIGNALING_UP       | 91  | 0.41903967 | 1.0207855 | 0.4064516  |
| CORRE_MULTIPLE_MYELOMA_UP     | 58  | 0.29731745 | 1.0207154 | 0.37006238 |
| CHIARETTI_ACUTE_LYMPHOBLASTIC | 62  | 0.3877758  | 1.0206375 | 0.42332613 |
| TAKEDA_TARGETS_OF_NUP98_HOX.  | 131 | 0.2895198  | 1.0192989 | 0.42574257 |
| SENESE_HDAC3_TARGETS_UP       | 460 | 0.3409386  | 1.0185231 | 0.42857143 |
| MENSE_HYPOXIA_UP              | 81  | 0.3596628  | 1.01822   | 0.39676112 |
| BROWNE_HCMV_INFECTION_30MIN   | 133 | 0.31292805 | 1.0170729 | 0.42828685 |
| CHEMNITZ_RESPONSE_TO_PROSTAC  | 313 | 0.27587658 | 1.0156329 | 0.31944445 |
| REACTOME_SLC_MEDIATED_TRANSI  | 162 | 0.2991203  | 1.0149838 | 0.4311377  |
| OSWALD_HEMATOPOIETIC_STEM_C   | 207 | 0.29963133 | 1.014494  | 0.50870407 |
| OSWALD_HEMATOPOIETIC_STEM_C   | 207 | 0.29963133 | 1.014494  | 0.50870407 |

|                               |     |            |            |            |
|-------------------------------|-----|------------|------------|------------|
| SHEDDEN_LUNG_CANCER_GOOD_SI   | 280 | 0.30375057 | 1.014059   | 0.47741935 |
| KEGG_MELANOGENESIS            | 98  | 0.28652224 | 1.0139173  | 0.37964776 |
| REACTOME_LOSS_OF_NLP_FROM_N   | 57  | 0.35206157 | 1.0135851  | 0.40451744 |
| THEILGAARD_NEUTROPHIL_AT_SKIN | 69  | 0.34726304 | 1.0122912  | 0.41700405 |
| FONTAINE_PAPILLARY_THYROID_CA | 65  | 0.32279894 | 1.0119041  | 0.39019188 |
| DIAZ_CHRONIC_MEYLOGENOUS_LEI  | 110 | 0.34436154 | 1.0099543  | 0.454      |
| YAUCH_HEDGEHOG_SIGNALING_PA   | 119 | 0.26579952 | 1.0091696  | 0.42626262 |
| CHENG_IMPRINTED_BY ESTRADIOL  | 98  | 0.31309626 | 1.0076854  | 0.49137932 |
| COATES_MACROPHAGE_M1_VS_M2    | 56  | 0.3346964  | 1.0072129  | 0.48670757 |
| KEGG_ADHERENS_JUNCTION        | 73  | 0.34026745 | 1.0069637  | 0.37524557 |
| FOSTER_INFLAMMATORY_RESPONS   | 336 | 0.29577386 | 1.0068642  | 0.5        |
| MCBRYAN_PUBERTAL_BREAST_6_7\  | 166 | 0.30296052 | 1.0065808  | 0.45526838 |
| LEE_METASTASIS_AND_ALTERNATIV | 71  | 0.3374341  | 1.0056792  | 0.43632567 |
| SATO_SILENCED_BY METHYLATION_ | 394 | 0.3092124  | 1.0029159  | 0.42765957 |
| FONTAINE_PAPILLARY_THYROID_CA | 58  | 0.2948412  | 1.0020891  | 0.42436975 |
| REACTOME_OPIOID_SIGNALLING    | 81  | 0.30405745 | 1.0020766  | 0.45530146 |
| REACTOME_SIGNALING_IN_IMMUN   | 322 | 0.32449198 | 1.0017958  | 0.45182014 |
| RICKMAN_HEAD_AND_NECK_CANCI   | 98  | 0.3071285  | 0.99969095 | 0.43907562 |
| CHIANG_LIVER_CANCER_SUBCLASS_ | 143 | 0.29626858 | 0.99885076 | 0.51012146 |
| LEE_LIVER_CANCER_MYC_E2F1_DN  | 60  | 0.3722807  | 0.9967902  | 0.42505133 |
| NAKAYAMA_SOFT_TISSUE_TUMORS   | 71  | 0.3002325  | 0.9960593  | 0.3935743  |
| SASSON_RESPONSE_TO_GONADOTF   | 65  | 0.343255   | 0.99283195 | 0.42505133 |
| GINESTIER_BREAST_CANCER_20Q13 | 96  | 0.33263922 | 0.9911753  | 0.46242774 |
| REACTOME_RNA_POLYMERASE_I_PI  | 69  | 0.3086931  | 0.9909287  | 0.41666666 |
| GRESHOCK_CANCER_COPY_NUMBEI   | 323 | 0.3070305  | 0.9904384  | 0.5155642  |
| ZHANG_TARGETS_OF_EWSR1_FLI1_  | 82  | 0.3247644  | 0.9889967  | 0.5193133  |
| BIOCARTA_HIVNEF_PATHWAY       | 55  | 0.30862254 | 0.98896223 | 0.50101835 |
| RHEIN_ALL_GLUCCORTICOID_THEF  | 72  | 0.28089088 | 0.98864985 | 0.40880504 |
| DAVICIONI_RHABDOMYOSARCOMA_   | 61  | 0.30792215 | 0.98833054 | 0.5165289  |
| MCBRYAN_PUBERTAL_BREAST_3_4\  | 176 | 0.2858824  | 0.98815536 | 0.39235413 |
| COULOUARN_TEMPORAL_TGFB1_SI   | 84  | 0.39833817 | 0.9880056  | 0.62818    |
| GOLDRATH_IMMUNE_MEMORY        | 54  | 0.33363748 | 0.9857638  | 0.45770064 |
| LEE_NEURAL_CREST_STEM_CELL_UF | 140 | 0.296312   | 0.9854703  | 0.4460888  |
| NIKOLSKY_BREAST_CANCER_8P12_F | 51  | 0.31296936 | 0.98420274 | 0.41894737 |
| NAKAYAMA_SOFT_TISSUE_TUMORS   | 76  | 0.2855274  | 0.9839324  | 0.48232847 |
| BROWNE_HCMV_INFECTION_14HR_   | 144 | 0.29999906 | 0.9801808  | 0.4717742  |
| BOYALT_LIVER_CANCER_SUBCLASS  | 58  | 0.32345894 | 0.97988546 | 0.3768421  |
| RUTELLA_RESPONSE_TO_CSF2RB_AI | 281 | 0.2814139  | 0.978447   | 0.50319827 |
| COATES_MACROPHAGE_M1_VS_M2    | 59  | 0.34094274 | 0.9782006  | 0.5233266  |
| ENGELMANN_CANCER_PROGENITOI   | 61  | 0.2980492  | 0.97810787 | 0.47291666 |
| REACTOME_HEMOSTASIS           | 262 | 0.2689123  | 0.977091   | 0.49380165 |

|                                 |     |            |            |            |
|---------------------------------|-----|------------|------------|------------|
| ZHANG_RESPONSE_TO_IKK_INHIBIT   | 94  | 0.3033442  | 0.9768533  | 0.5267327  |
| URS_ADIPOCYTE_DIFFERENTIATION   | 59  | 0.33662495 | 0.9753253  | 0.5010707  |
| HAHTOLA_MYCOSIS_FUNGOIDES_SK    | 161 | 0.2861199  | 0.9742423  | 0.63983905 |
| LINDSTEDT_DENDRITIC_CELL_MATU   | 55  | 0.3241166  | 0.9739135  | 0.4055794  |
| BROWNE_HCMV_INFECTION_12HR      | 100 | 0.30128133 | 0.97324675 | 0.49315068 |
| GRESHOCK_CANCER_COPY_NUMBEI     | 308 | 0.31035733 | 0.9732012  | 0.54247105 |
| SABATES_COLORECTAL_ADENOMA      | 262 | 0.2593522  | 0.9730176  | 0.43222004 |
| KAYO_AGING_MUSCLE_UP            | 177 | 0.28354374 | 0.97145784 | 0.4877551  |
| DELYS_THYROID_CANCER_DN         | 206 | 0.26441735 | 0.9701128  | 0.5137795  |
| MARKEY_RB1_CHRONIC_LOF_DN       | 96  | 0.34707427 | 0.9698883  | 0.43383947 |
| TURASHVILI_BREAST_DUCTAL_CARC   | 180 | 0.28595066 | 0.9668552  | 0.48425198 |
| MULLIGHAN_MLL_SIGNATURE_1_DI    | 221 | 0.25591087 | 0.96614933 | 0.5051975  |
| DEBIASI_APOPTOSIS_BY_REOVIRUS   | 222 | 0.3382863  | 0.96609133 | 0.6144814  |
| WEST_ADRENOCORTICAL_TUMOR_I     | 495 | 0.32190958 | 0.9653423  | 0.5586354  |
| MAHAJAN_RESPONSE_TO_IL1A_UP     | 64  | 0.30495495 | 0.96332985 | 0.56646216 |
| MASSARWEH_RESPONSE_TO_ESTRA     | 53  | 0.31130135 | 0.9612613  | 0.54633206 |
| CHIANG_LIVER_CANCER_SUBCLASS    | 63  | 0.34022743 | 0.96088845 | 0.57051283 |
| IVANOVA_HEMATOPOIESIS_STEM_C    | 183 | 0.25867727 | 0.9607133  | 0.5502092  |
| CHARAFE_BREAST_CANCER_BASAL     | 109 | 0.3409062  | 0.9583383  | 0.52903223 |
| LAIHO_COLORECTAL_CANCER_SERR    | 103 | 0.29254526 | 0.95768005 | 0.5777311  |
| REACTOME_INNATE_IMMUNITY_SIG    | 105 | 0.33456513 | 0.9574215  | 0.626327   |
| REACTOME_TOLL_RECEPTOR_CASC     | 82  | 0.34040293 | 0.9547298  | 0.62236285 |
| WATANABE_RECTAL_CANCER_RADII    | 98  | 0.26718062 | 0.9543686  | 0.55424064 |
| SIG_PIP3_SIGNALING_IN_CARDIAC_I | 63  | 0.28746653 | 0.95365447 | 0.4785276  |
| LI_WILMS_TUMOR_VS_FETAL_KIDN    | 173 | 0.2898956  | 0.9534966  | 0.60749507 |
| BROWNE_HCMV_INFECTION_20HR      | 106 | 0.31436417 | 0.95321935 | 0.4488189  |
| PYEON_HPVP_POSITIVE_TUMORS_UF   | 73  | 0.39330927 | 0.95303154 | 0.6019608  |
| KEGG_CYTOKINE_CYTOKINE_RECEPT   | 245 | 0.2611456  | 0.9528427  | 0.5419355  |
| GOTTWEIN_TARGETS_OF_KSHV_MII    | 53  | 0.32693282 | 0.95191497 | 0.5852156  |
| IWANAGA_CARCINOGENESIS_BY_KR    | 94  | 0.27387667 | 0.948852   | 0.57575756 |
| LIN_NPAS4_TARGETS_UP            | 123 | 0.31159285 | 0.94877946 | 0.6143411  |
| KEGG_LONG_TERM_POTENTIATION     | 68  | 0.30138555 | 0.9481255  | 0.5883534  |
| HOFFMANN_PRE_BI_TO_LARGE_PRI    | 53  | 0.3354312  | 0.9479333  | 0.60714287 |
| WALLACE_PROSTATE_CANCER_RACI    | 71  | 0.2857669  | 0.94780564 | 0.60229445 |
| KEGG_LEISHMANIA_INFECTION       | 62  | 0.31393185 | 0.94757956 | 0.64853555 |
| YOSHIOKA_LIVER_CANCER_EARLY_R   | 52  | 0.3247331  | 0.94694376 | 0.52978724 |
| TIEN_INTESTINE_PROBIOTICS_24HR  | 197 | 0.29160067 | 0.94533086 | 0.5264188  |
| CONCANNON_APOPTOSIS_BY_EPOX     | 213 | 0.29683164 | 0.9452435  | 0.4676409  |
| KEGG_ADIPOCYTOKINE_SIGNALING    | 66  | 0.331484   | 0.944571   | 0.6293996  |
| AMIT_SERUM_RESPONSE_120_MCF     | 61  | 0.31231058 | 0.94353896 | 0.47280335 |
| SMID_BREAST_CANCER_NORMAL_L     | 438 | 0.30771172 | 0.9425362  | 0.5153374  |

|                                 |     |            |            |            |
|---------------------------------|-----|------------|------------|------------|
| KEGG_HYPERTROPHIC_CARDIOMYO     | 82  | 0.28696188 | 0.94249713 | 0.5878661  |
| HOQUE_METHYLATED_IN_CANCER      | 54  | 0.31285623 | 0.94039094 | 0.583682   |
| HUTTMANN_B_CLL_POOR_SURVIVA     | 58  | 0.3525089  | 0.9398471  | 0.48956355 |
| WNT_SIGNALING                   | 87  | 0.282412   | 0.938912   | 0.61523044 |
| SASSON_RESPONSE_TO_FORSKOLIN    | 66  | 0.33121288 | 0.9377694  | 0.52244896 |
| BRUECKNER_TARGETS_OF_MIRLET7    | 103 | 0.2712521  | 0.9363663  | 0.667319   |
| KEGG_P53_SIGNALING_PATHWAY      | 65  | 0.33354774 | 0.9336085  | 0.62167686 |
| REACTOME_INORGANIC_CATION_AI    | 91  | 0.3025401  | 0.9333219  | 0.56512606 |
| REACTOME_FORMATION_OF_PLATE     | 174 | 0.2565168  | 0.93301517 | 0.60493827 |
| WILCOX_PRESPONSE_TO_ROGESTEF    | 59  | 0.31674287 | 0.93284    | 0.607767   |
| TIEN_INTESTINE_PROBIOTICS_2HR_I | 79  | 0.3194391  | 0.9326134  | 0.57338554 |
| REACTOME_PLATELET_ACTIVATION    | 155 | 0.25813422 | 0.93223447 | 0.5962733  |
| LANDIS_ERBB2_BREAST_TUMORS_3    | 126 | 0.3049437  | 0.93210965 | 0.62139916 |
| GARGALOVIC_RESPONSE_TO_OXIDI    | 61  | 0.2975809  | 0.9314793  | 0.49686846 |
| BROWNE_HCMV_INFECTION_48HR_     | 461 | 0.2673683  | 0.9300536  | 0.6567164  |
| GAUSSMANN_MLL_AF4_FUSION_TA     | 75  | 0.23400703 | 0.9292734  | 0.6437247  |
| DAVICIONI_TARGETS_OF_PAX_FOXC   | 63  | 0.35452753 | 0.927207   | 0.59884834 |
| KOKKINAKIS_METHIONINE_DEPRIVA   | 117 | 0.2839384  | 0.9268913  | 0.6131687  |
| REACTOME_REGULATION_OF_INSUI    | 60  | 0.3265495  | 0.9261685  | 0.5769231  |
| GARY_CD5_TARGETS_UP             | 427 | 0.3041211  | 0.9243785  | 0.5567452  |
| GERY_CEBP_TARGETS               | 109 | 0.27731848 | 0.9241079  | 0.64300203 |
| WOO_LIVER_CANCER_RECURRENCE     | 98  | 0.2581275  | 0.92331994 | 0.6545454  |
| LIAO_METASTASIS                 | 475 | 0.3058694  | 0.9220995  | 0.6609442  |
| MCCABE_BOUND_BY_HOXC6           | 346 | 0.25079516 | 0.9217426  | 0.61875    |
| WU_CELL_MIGRATION               | 168 | 0.27069712 | 0.9192638  | 0.69960475 |
| SHEN_SMARCA2_TARGETS_DN         | 318 | 0.26349404 | 0.91814643 | 0.58773786 |
| LIN_MELANOMA_COPY_NUMBER_L      | 65  | 0.29290843 | 0.9181389  | 0.64179105 |
| KEGG_SYSTEMIC_LUPUS_ERYTHEMA    | 107 | 0.2785009  | 0.9178562  | 0.4915254  |
| TAKEDA_TARGETS_OF_NUP98_HOX     | 142 | 0.269254   | 0.9173712  | 0.69758064 |
| MORI_MATURE_B_LYMPHOCYTE_UI     | 67  | 0.33671778 | 0.915337   | 0.592955   |
| RUTELLA_RESPONSE_TO_CSF2RB_AI   | 315 | 0.25264636 | 0.9151177  | 0.68958336 |
| FALVELLA_SMOKERS_WITH_LUNG_C    | 66  | 0.33511114 | 0.9146422  | 0.60687023 |
| JAZAG_TGFB1_SIGNALING_VIA_SMA   | 60  | 0.31935957 | 0.9137758  | 0.5983087  |
| DACOSTA_UV_RESPONSE_VIA_ERCC    | 371 | 0.37084475 | 0.9124249  | 0.5549133  |
| DIRMEIER_LMP1_RESPONSE_EARLY    | 51  | 0.33529842 | 0.911953   | 0.6172043  |
| FLECHNER_PBL_KIDNEY_TRANSPLAN   | 57  | 0.3503168  | 0.91056216 | 0.69617707 |
| GOZGIT_ESR1_TARGETS_UP          | 131 | 0.27527317 | 0.90958756 | 0.5862069  |
| MULLIGHAN_MLL_SIGNATURE_2_DI    | 254 | 0.24713755 | 0.90906996 | 0.81086516 |
| BILD_CTNNB1_ONCOGENIC_SIGNAT    | 66  | 0.3382868  | 0.9082447  | 0.52975047 |
| REACTOME_GOLGI_ASSOCIATED_VE    | 51  | 0.3369234  | 0.90715235 | 0.70883536 |
| ACEVEDO_LIVER_CANCER_WITH_H3    | 233 | 0.2559195  | 0.9071124  | 0.71705425 |

|                               |     |            |            |            |
|-------------------------------|-----|------------|------------|------------|
| TURASHVILI_BREAST_LOBULAR_CAR | 86  | 0.24815214 | 0.90565896 | 0.6368932  |
| MCBRYAN_PUBERTAL_BREAST_5_6V  | 99  | 0.26627815 | 0.905175   | 0.6720322  |
| KEGG_COMPLEMENT_AND_COAGUI    | 66  | 0.29552883 | 0.90138906 | 0.5        |
| ACEVEDO_LIVER_CANCER_WITH_H3  | 92  | 0.318561   | 0.900944   | 0.5852713  |
| MCBRYAN_PUBERTAL_BREAST_5_6V  | 111 | 0.2796627  | 0.90046275 | 0.6269531  |
| HELLER_SILENCED_BY_METHYLATIO | 93  | 0.29394054 | 0.89953244 | 0.49183673 |
| REACTOME_CLATHRIN_DERIVED_VE  | 58  | 0.3354593  | 0.8988894  | 0.7429719  |
| REACTOME_GPCR_LIGAND_BINDING  | 347 | 0.24133931 | 0.8970561  | 0.64065707 |
| KEGG_CELL_ADHESION_MOLECULES  | 125 | 0.33530375 | 0.8960414  | 0.6147541  |
| CHIANG_LIVER_CANCER_SUBCLASS_ | 140 | 0.24745788 | 0.89586544 | 0.6489152  |
| RODWELL_AGING_KIDNEY_NO_BLO   | 136 | 0.31513518 | 0.89466554 | 0.63752663 |
| DACOSTA_UV_RESPONSE_VIA_ERCC  | 63  | 0.3558879  | 0.89430606 | 0.63829786 |
| DAVICIONI_PAX_FOXO1_SIGNATURE | 51  | 0.31487313 | 0.893724   | 0.59026366 |
| GINESTIER_BREAST_CANCER_20Q13 | 152 | 0.29305884 | 0.8922483  | 0.5961945  |
| MARTINEZ_TP53_TARGETS_UP      | 500 | 0.2527506  | 0.8917144  | 0.78701824 |
| SHEPARD_BMYB_MORPHOLINO_DN    | 155 | 0.29519603 | 0.8909371  | 0.6969697  |
| OSMAN_BLADDER_CANCER_UP       | 348 | 0.2938167  | 0.8890761  | 0.69803923 |
| XU_GH1_EXOGENOUS_TARGETS_DN   | 91  | 0.25217494 | 0.88736016 | 0.7758985  |
| JIANG_HYPOXIA_NORMAL          | 203 | 0.29492652 | 0.8865789  | 0.6268344  |
| CHIARADONNA_NEOPLASTIC_TRANS  | 130 | 0.3187439  | 0.88637656 | 0.56751055 |
| COULOUARN_TEMPORAL_TGFB1_SI   | 116 | 0.28637782 | 0.88433474 | 0.6820084  |
| KEGG_PROGESTERONE_MEDIATED_   | 82  | 0.30560413 | 0.8833731  | 0.62753034 |
| KLEIN_PRIMARY_EFFUSION_LYMPHO | 53  | 0.30923107 | 0.8803885  | 0.6923077  |
| REACTOME_CLASS_B2_SECRETIN_FA | 79  | 0.31469798 | 0.88037163 | 0.6048565  |
| ZHOU_INFLAMMATORY_RESPONSE_   | 246 | 0.2860389  | 0.88016015 | 0.7068607  |
| MARTINEZ_RB1_AND_TP53_TARGET  | 500 | 0.2469803  | 0.87684894 | 0.6646586  |
| BORCZUK_MALIGNANT_MESOTHELI   | 90  | 0.29277793 | 0.8755655  | 0.57894737 |
| SHEPARD_BMYB_TARGETS          | 60  | 0.31156945 | 0.87230635 | 0.67722774 |
| MILI_PSEUDOPODIA_CHEMOTAXIS_  | 392 | 0.26833358 | 0.87190425 | 0.7388535  |
| MONNIER_POSTRADIATION_TUMOF   | 286 | 0.28010297 | 0.8714158  | 0.71308017 |
| RODWELL_AGING_KIDNEY_UP       | 308 | 0.30542412 | 0.8703365  | 0.59528905 |
| ROSS_AML_WITH_MLL_FUSIONS     | 73  | 0.28873077 | 0.8689296  | 0.6603774  |
| MCMURRAY_TP53_HRAS_COOPERA    | 62  | 0.27647632 | 0.86861634 | 0.6360153  |
| REACTOME_TELOMERE_MAINTENAI   | 64  | 0.30765522 | 0.86587244 | 0.6979167  |
| SHEN_SMARCA2_TARGETS_UP       | 359 | 0.38265043 | 0.86188954 | 0.64285713 |
| NIKOLSKY_BREAST_CANCER_7Q21_  | 61  | 0.27296764 | 0.8611576  | 0.8032787  |
| FIRESTEIN_PROLIFERATION       | 154 | 0.2539844  | 0.8593694  | 0.9204082  |
| KYNG_DNA_DAMAGE_UP            | 96  | 0.2575145  | 0.8592532  | 0.7366255  |
| MCBRYAN_PUBERTAL_BREAST_6_7V  | 62  | 0.28534576 | 0.85624945 | 0.7406639  |
| HAN_SATB1_TARGETS_UP          | 284 | 0.2530252  | 0.8552107  | 0.7944112  |
| FLECHNER_BIOPSY_KIDNEY_TRANSP | 81  | 0.34519768 | 0.85472494 | 0.6738197  |

|                               |     |            |            |            |
|-------------------------------|-----|------------|------------|------------|
| CROONQUIST_NRAS_VS_STROMAL_   | 74  | 0.29143515 | 0.85081345 | 0.7672065  |
| RICKMAN_HEAD_AND_NECK_CANCE   | 83  | 0.29440653 | 0.8497076  | 0.7579618  |
| REACTOME_BIOLOGICAL_OXIDATIO  | 113 | 0.2752495  | 0.84923214 | 0.79317695 |
| DAIRKEE_TERT_TARGETS_DN       | 80  | 0.2801108  | 0.8490168  | 0.7411765  |
| AMIT_EGF_RESPONSE_480_HELA    | 144 | 0.30013186 | 0.84815085 | 0.6624473  |
| RICKMAN_HEAD_AND_NECK_CANCE   | 52  | 0.25383765 | 0.84643227 | 0.76875    |
| REACTOME_CELL_JUNCTION_ORGAI  | 78  | 0.26818278 | 0.8463407  | 0.86262625 |
| LINDGREN_BLADDER_CANCER_CLUS  | 111 | 0.2712056  | 0.8437166  | 0.7069307  |
| JI_RESPONSE_TO_FSH_UP         | 52  | 0.28265136 | 0.8430939  | 0.906639   |
| OUELLET_CULTURED_OVARIAN_CAN  | 68  | 0.28235033 | 0.8426254  | 0.75456387 |
| WATANABE_COLON_CANCER_MSI_1   | 64  | 0.29357615 | 0.83966434 | 0.69625247 |
| KEGG_TGF_BETA_SIGNALING_PATHW | 82  | 0.2532571  | 0.83694917 | 0.8765182  |
| FERRANDO_T_ALL_WITH_MLL_ENL_  | 71  | 0.2808284  | 0.8341173  | 0.8466387  |
| CREIGHTON_ENDOCRINE_THERAPY_  | 370 | 0.2507513  | 0.8335505  | 0.6481481  |
| REACTOME_TCR_SIGNALING        | 57  | 0.336203   | 0.8329772  | 0.68653846 |
| GAZDA_DIAMOND_BLACKFAN_ANEIA  | 417 | 0.26336882 | 0.83275133 | 0.8160173  |
| LEE_LIVER_CANCER_ACOX1_UP     | 59  | 0.2827584  | 0.83094305 | 0.78131634 |
| CERVERA_SDHB_TARGETS_1_UP     | 98  | 0.2825995  | 0.83079684 | 0.8301075  |
| BENPORATH_ES_CORE_NINE_CORRE  | 97  | 0.249256   | 0.8295484  | 0.8873239  |
| TCGA_GLIOMASTOMA_COPY_NUMI    | 65  | 0.30796093 | 0.8272346  | 0.8476954  |
| MULLIGHAN_MLL_SIGNATURE_2_UI  | 382 | 0.29518405 | 0.8268195  | 0.8137045  |
| CAMPS_COLON_CANCER_COPY_NUMI  | 69  | 0.26330727 | 0.82423455 | 0.87763715 |
| WANG_ESOPHAGUS_CANCER_VS_N    | 106 | 0.28124565 | 0.82397944 | 0.7668067  |
| MARTORIATI_MDM4_TARGETS_FET.  | 250 | 0.25609598 | 0.8235843  | 0.8551859  |
| AMIT_SERUM_RESPONSE_60_MCF1   | 54  | 0.28104696 | 0.8230121  | 0.751434   |
| WELCSH_BRCA1_TARGETS_1_UP     | 160 | 0.25963593 | 0.8225952  | 0.764      |
| RICKMAN_TUMOR_DIFFERENTIATED  | 325 | 0.2699024  | 0.8217856  | 0.69857436 |
| CHEBOTAEV_GR_TARGETS_UP       | 65  | 0.2709669  | 0.8195579  | 0.9055118  |
| RASHI_RESPONSE_TO_IONIZING_RA | 73  | 0.29650927 | 0.8194116  | 0.7257384  |
| CORRE_MULTIPLE_MYELOMA_DN     | 58  | 0.25575018 | 0.81622165 | 0.87573963 |
| KAAB_HEART_ATRIUM_VS_VENTRIC  | 232 | 0.28707206 | 0.8152669  | 0.7548387  |
| ST_FAS_SIGNALING_PATHWAY      | 57  | 0.28404966 | 0.812999   | 0.79193205 |
| ACEVEDO_NORMAL_TISSUE_ADJACI  | 150 | 0.24408221 | 0.81151646 | 0.82738096 |
| TANAKA_METHYLATED_IN_ESOPHA   | 91  | 0.25517306 | 0.81027764 | 0.7773196  |
| SENGUPTA_NASOPHARYNGEAL_CAF   | 285 | 0.23897475 | 0.81008893 | 0.90618336 |
| UEDA_CENTRAL_CLOCK            | 79  | 0.2622952  | 0.8087872  | 0.81762296 |
| REACTOME_G2_M_TRANSITION      | 76  | 0.29726198 | 0.8083704  | 0.7464213  |
| PASQUALUCCI_LYMPHOMA_BY_GC_   | 240 | 0.24775794 | 0.8076936  | 0.9435484  |
| CADWELL_ATG16L1_TARGETS_DN    | 53  | 0.24926685 | 0.8050452  | 0.849711   |
| CHIARADONNA_NEOPLASTIC_TRAN   | 112 | 0.28393432 | 0.80485696 | 0.8792079  |
| LEE_LIVER_CANCER_E2F1_DN      | 57  | 0.3009489  | 0.8046126  | 0.78435516 |

|                                                             |     |            |            |            |
|-------------------------------------------------------------|-----|------------|------------|------------|
| REACTOME_GLUCOSE_AND_OTHER_BENPORATH_NOS_TARGETS            | 78  | 0.2777374  | 0.80409926 | 0.85265225 |
| DEBIASI_APOPTOSIS_BY_REOVIRUS_NIKOLSKY_BREAST_CANCER_8Q23_C | 156 | 0.2629447  | 0.8018954  | 0.8007663  |
| NELSON_RESPONSE_TO_ANDROGEN                                 | 205 | 0.28151885 | 0.80093884 | 0.76842105 |
| BROWNE_HCMV_INFECTION_18HR_REACTOME_CLASS_A1_RHODOPSIN      | 134 | 0.30540022 | 0.80013347 | 0.5897436  |
| REACTOME_MEMBRANE_TRAFFICKI                                 | 76  | 0.264534   | 0.79996645 | 0.7917526  |
| TIEN_INTESTINE_PROBIOTICS_6HR_I                             | 163 | 0.25987056 | 0.7980771  | 0.8821053  |
| DE_Y1_TARGETS_DN                                            | 254 | 0.20290774 | 0.79349124 | 0.91848904 |
| KEGG_METABOLISM_OF_XENOBIOT                                 | 74  | 0.28971267 | 0.79197615 | 0.94578314 |
| HAMAI_APOPTOSIS_VIA_TRAIL_DN                                | 150 | 0.2597132  | 0.78689307 | 0.84232366 |
| YAGI_AML_WITH_11Q23_REARRAN                                 | 84  | 0.3233339  | 0.7867374  | 0.76447874 |
| CASTELLANO_NRAS_TARGETS_UP                                  | 60  | 0.2626595  | 0.78600067 | 0.7177419  |
| TURASHVILI_BREAST_DUCTAL_CARC                               | 123 | 0.2863232  | 0.78550804 | 0.68619245 |
| REACTOME_G_ALPHA_Q_SIGNALLIN                                | 332 | 0.2404963  | 0.78438604 | 0.91260165 |
| SHEPARD_CRUSH_AND_BURN_MUT                                  | 58  | 0.2846987  | 0.78190184 | 0.8816326  |
| SABATES_COLORECTAL_ADENOMA                                  | 64  | 0.27751747 | 0.7804712  | 0.7523992  |
| HUANG_DASATINIB_RESISTANCE_UI                               | 140 | 0.2149569  | 0.77585155 | 0.93361884 |
| KANG_IMMORTALIZED_BY_TERT_UF                                | 146 | 0.24829343 | 0.7755922  | 0.78137654 |
| ICHIBA_GRAFT_VERSUS_HOST_DISE                               | 124 | 0.22996187 | 0.7749905  | 0.96842104 |
| CHANDRAN_METASTASIS_UP                                      | 74  | 0.27022624 | 0.77349275 | 0.8722555  |
| ACEVEDO_LIVER_TUMOR_VS_NORM                                 | 85  | 0.2227057  | 0.7732314  | 0.9107505  |
| KOYAMA_SEMA3B_TARGETS_DN                                    | 110 | 0.2537272  | 0.7723839  | 0.8568421  |
| REACTOME_G_ALPHA_I_SIGNALLIN                                | 73  | 0.2581657  | 0.7722989  | 0.83908045 |
| KEGG_DRUG_METABOLISM_CYTOCH                                 | 241 | 0.24436288 | 0.76877165 | 0.8939394  |
| BERNARD_PPAPDC1B_TARGETS_DN                                 | 264 | 0.22883666 | 0.76701576 | 0.96781117 |
| AMUNDSON_POOR_SURVIVAL_AFTI                                 | 151 | 0.22150713 | 0.7668938  | 0.8580508  |
| IGARASHI_ATF4_TARGETS_DN                                    | 61  | 0.26710817 | 0.76661485 | 0.7966805  |
| CHARAFE_BREAST_CANCER_LUMIN/                                | 51  | 0.25894463 | 0.76376814 | 0.9318182  |
| KEGG_EPITHELIAL_CELL_SIGNALING                              | 81  | 0.2472766  | 0.75517416 | 0.8773389  |
| REACTOME_COSTIMULATION_BY_TI                                | 81  | 0.28862256 | 0.75005925 | 0.9295499  |
| CHARAFE_BREAST_CANCER_LUMIN/                                | 405 | 0.24461153 | 0.7477649  | 0.827853   |
| MULLIGHAN_MLL_SIGNATURE_1_UI                                | 62  | 0.2577934  | 0.7448317  | 0.9269777  |
| SENESE_HDAC1_TARGETS_UP                                     | 62  | 0.2630114  | 0.74430037 | 0.81724846 |
| HARRIS_HYPOXIA                                              | 406 | 0.24822828 | 0.74274343 | 0.9112426  |
| KIM_RESPONSE_TO_TSA_AND_DECI                                | 354 | 0.26784524 | 0.7411629  | 0.8669528  |
| RICKMAN_METASTASIS_DN                                       | 404 | 0.25732073 | 0.7410744  | 0.9510763  |
| IWANAGA_CARCINOGENESIS_BY_KR                                | 79  | 0.26387277 | 0.7409238  | 0.7610063  |
| HUPER_BREAST_BASAL_VS_LUMINA                                | 124 | 0.25806186 | 0.74065006 | 0.7832618  |
| STEARMAN_LUNG_CANCER_EARLY_                                 | 239 | 0.2744839  | 0.7398007  | 0.8231579  |
|                                                             | 134 | 0.23161595 | 0.7374404  | 0.9128713  |
|                                                             | 57  | 0.2811768  | 0.7354711  | 0.805668   |
|                                                             | 51  | 0.245867   | 0.72974277 | 0.940552   |

|                               |     |            |            |            |
|-------------------------------|-----|------------|------------|------------|
| PYEON_CANCER_HEAD_AND_NECK_   | 162 | 0.30066553 | 0.72623754 | 0.78805393 |
| REACTOME_INTEGRIN_CELL_SURFAI | 80  | 0.2734687  | 0.72547406 | 0.875      |
| GRAHAM_CML QUIESCENT_VS_NOI   | 85  | 0.25790972 | 0.7231567  | 0.8702929  |
| YAMASHITA_LIVER_CANCER_STEM_  | 72  | 0.22879332 | 0.72176933 | 0.9686192  |
| REN_ALVEOLAR_RHABDOMYOSARCI   | 392 | 0.24052411 | 0.7199733  | 0.96868473 |
| LAU_APOPTOSIS_CDKN2A_UP       | 55  | 0.2686193  | 0.71980715 | 0.8589212  |
| KEGG_VIRAL_MYOCARDITIS        | 67  | 0.2684054  | 0.71918947 | 0.8469828  |
| DAZARD_RESPONSE_TO_UV_NHEK_   | 146 | 0.25850958 | 0.7188308  | 0.82377917 |
| MARTORIATI_MDM4_TARGETS_FET.  | 90  | 0.25184676 | 0.69085133 | 0.9683544  |
| BLUM_RESPONSE_TO_SALIRASIB_UI | 230 | 0.25615865 | 0.6840535  | 0.95606697 |
| LEE_LIVER_CANCER_ACOX1_DN     | 62  | 0.28677472 | 0.68042    | 0.9456067  |
| JISON_SICKLE_CELL_DISEASE_UP  | 169 | 0.24990278 | 0.6759622  | 0.9683544  |
| GINESTIER_BREAST_CANCER_ZNF21 | 275 | 0.2577377  | 0.6740856  | 0.8789809  |
| NAKAYAMA_SOFT_TISSUE_TUMORS   | 85  | 0.21723817 | 0.6660491  | 0.9435484  |
| HAMAI_APOPTOSIS_VIA_TRAIL_UP  | 328 | 0.25483793 | 0.66603905 | 0.8585086  |
| REACTOME_IMMUNOREGULATORY_    | 72  | 0.30420104 | 0.6594633  | 0.8296146  |
| KEGG_GLYCEROPHOSPHOLIPID_MET  | 65  | 0.3008476  | 0.6545679  | 0.93459916 |
| HOSHIDA_LIVER_CANCER_LATE_REC | 65  | 0.24814317 | 0.642793   | 0.9683544  |
| ZHAN_MULTIPLE_MYELOMA_CD1_V   | 61  | 0.23742329 | 0.63728935 | 0.8983402  |
| LEE_LIVER_CANCER_SURVIVAL_UP  | 126 | 0.2325017  | 0.62524295 | 0.9275053  |
| KESHELAVA_MULTIPLE_DRUG_RESIS | 76  | 0.2465888  | 0.61300653 | 0.96753246 |
| NIKOLSKY_BREAST_CANCER_16P13_ | 99  | 0.3087279  | 0.5874377  | 0.9275053  |



| FDR q-val  | FWER p-val | RANK AT MA\ LEADING EDGE            |
|------------|------------|-------------------------------------|
| 0.8160555  | 0.252      | 1558 tags=24%, list=8%, signal=26%  |
| 1          | 0.855      | 4505 tags=47%, list=22%, signal=60% |
| 1          | 0.855      | 5338 tags=45%, list=26%, signal=61% |
| 0.93709844 | 0.886      | 2023 tags=28%, list=10%, signal=31% |
| 0.9611517  | 0.898      | 3598 tags=41%, list=17%, signal=50% |
| 0.9487064  | 0.914      | 3753 tags=50%, list=18%, signal=61% |
| 0.9275164  | 0.924      | 2625 tags=33%, list=13%, signal=37% |
| 0.92396384 | 0.935      | 4622 tags=45%, list=22%, signal=57% |
| 0.9139193  | 0.935      | 3598 tags=39%, list=17%, signal=47% |
| 0.9195182  | 0.935      | 2979 tags=28%, list=14%, signal=32% |
| 0.90509427 | 0.935      | 4393 tags=42%, list=21%, signal=54% |
| 0.8713794  | 0.95       | 3989 tags=34%, list=19%, signal=42% |
| 0.8482097  | 0.95       | 4693 tags=36%, list=23%, signal=46% |
| 0.70865256 | 0.966      | 4384 tags=31%, list=21%, signal=39% |
| 0.719016   | 0.966      | 3503 tags=25%, list=17%, signal=29% |
| 0.70559406 | 0.966      | 4032 tags=32%, list=20%, signal=39% |
| 0.667602   | 0.966      | 1752 tags=17%, list=8%, signal=18%  |
| 0.6529022  | 0.966      | 4270 tags=34%, list=21%, signal=42% |
| 0.6816711  | 0.966      | 3956 tags=32%, list=19%, signal=40% |
| 0.654573   | 0.966      | 1822 tags=19%, list=9%, signal=21%  |
| 0.59185064 | 0.966      | 4034 tags=36%, list=20%, signal=44% |
| 0.6032912  | 0.979      | 4457 tags=37%, list=22%, signal=47% |
| 0.5965214  | 0.979      | 4637 tags=32%, list=22%, signal=41% |
| 0.5923852  | 0.979      | 4200 tags=40%, list=20%, signal=50% |
| 0.6090417  | 0.979      | 4111 tags=35%, list=20%, signal=43% |
| 0.600675   | 0.979      | 2067 tags=22%, list=10%, signal=25% |
| 0.59605324 | 0.979      | 3539 tags=41%, list=17%, signal=49% |
| 0.5982868  | 0.979      | 3677 tags=28%, list=18%, signal=34% |
| 0.59631795 | 0.979      | 2613 tags=38%, list=13%, signal=43% |
| 0.5886974  | 0.979      | 4115 tags=28%, list=20%, signal=34% |
| 0.5867157  | 1          | 4608 tags=42%, list=22%, signal=53% |
| 0.5807079  | 1          | 4387 tags=38%, list=21%, signal=47% |
| 0.5740293  | 1          | 3432 tags=31%, list=17%, signal=37% |
| 0.57416594 | 1          | 1891 tags=24%, list=9%, signal=26%  |
| 0.5852472  | 1          | 4635 tags=42%, list=22%, signal=54% |
| 0.59097284 | 1          | 3867 tags=37%, list=19%, signal=45% |
| 0.58797103 | 1          | 2412 tags=25%, list=12%, signal=28% |
| 0.58647037 | 1          | 2692 tags=31%, list=13%, signal=36% |
| 0.5803544  | 1          | 4286 tags=33%, list=21%, signal=42% |
| 0.58743393 | 1          | 6894 tags=47%, list=33%, signal=70% |

|            |   |                                     |
|------------|---|-------------------------------------|
| 0.5881151  | 1 | 5315 tags=38%, list=26%, signal=51% |
| 0.58384866 | 1 | 2900 tags=31%, list=14%, signal=36% |
| 0.5851373  | 1 | 3598 tags=39%, list=17%, signal=47% |
| 0.5976704  | 1 | 6029 tags=40%, list=29%, signal=56% |
| 0.58807874 | 1 | 3682 tags=22%, list=18%, signal=27% |
| 0.5887967  | 1 | 4690 tags=41%, list=23%, signal=53% |
| 0.58325946 | 1 | 3612 tags=30%, list=17%, signal=36% |
| 0.579298   | 1 | 4330 tags=38%, list=21%, signal=48% |
| 0.5754096  | 1 | 4227 tags=40%, list=20%, signal=50% |
| 0.5673049  | 1 | 3774 tags=30%, list=18%, signal=36% |
| 0.5666431  | 1 | 4412 tags=42%, list=21%, signal=53% |
| 0.5650953  | 1 | 2318 tags=20%, list=11%, signal=22% |
| 0.56324404 | 1 | 5805 tags=32%, list=28%, signal=45% |
| 0.5722912  | 1 | 4422 tags=42%, list=21%, signal=53% |
| 0.5954292  | 1 | 3270 tags=24%, list=16%, signal=28% |
| 0.5963502  | 1 | 2649 tags=31%, list=13%, signal=35% |
| 0.59118336 | 1 | 3793 tags=30%, list=18%, signal=36% |
| 0.5901049  | 1 | 3657 tags=23%, list=18%, signal=28% |
| 0.58918524 | 1 | 3072 tags=27%, list=15%, signal=32% |
| 0.5921412  | 1 | 6800 tags=54%, list=33%, signal=80% |
| 0.5971512  | 1 | 3318 tags=25%, list=16%, signal=29% |
| 0.59393185 | 1 | 3475 tags=29%, list=17%, signal=35% |
| 0.5950509  | 1 | 4777 tags=38%, list=23%, signal=50% |
| 0.59200174 | 1 | 5021 tags=49%, list=24%, signal=65% |
| 0.589309   | 1 | 2935 tags=45%, list=14%, signal=52% |
| 0.59098536 | 1 | 5191 tags=45%, list=25%, signal=60% |
| 0.5907466  | 1 | 3582 tags=31%, list=17%, signal=38% |
| 0.6031263  | 1 | 4407 tags=35%, list=21%, signal=44% |
| 0.6204978  | 1 | 4114 tags=22%, list=20%, signal=27% |
| 0.61712295 | 1 | 3726 tags=28%, list=18%, signal=34% |
| 0.613948   | 1 | 4539 tags=31%, list=22%, signal=40% |
| 0.6102582  | 1 | 3202 tags=31%, list=16%, signal=36% |
| 0.60713744 | 1 | 3659 tags=25%, list=18%, signal=30% |
| 0.60763484 | 1 | 5243 tags=38%, list=25%, signal=51% |
| 0.60586494 | 1 | 4975 tags=44%, list=24%, signal=58% |
| 0.60474896 | 1 | 4444 tags=23%, list=22%, signal=30% |
| 0.59047467 | 1 | 3586 tags=25%, list=17%, signal=30% |
| 0.59333026 | 1 | 4885 tags=54%, list=24%, signal=70% |
| 0.59182155 | 1 | 5457 tags=38%, list=26%, signal=50% |
| 0.59559304 | 1 | 5523 tags=26%, list=27%, signal=35% |
| 0.5923945  | 1 | 4045 tags=35%, list=20%, signal=43% |

|            |   |                                     |
|------------|---|-------------------------------------|
| 0.5928207  | 1 | 4129 tags=36%, list=20%, signal=44% |
| 0.6028582  | 1 | 4677 tags=26%, list=23%, signal=33% |
| 0.6013521  | 1 | 4448 tags=38%, list=22%, signal=47% |
| 0.6024876  | 1 | 3332 tags=30%, list=16%, signal=36% |
| 0.5968579  | 1 | 5112 tags=48%, list=25%, signal=64% |
| 0.59422255 | 1 | 4759 tags=41%, list=23%, signal=52% |
| 0.5943974  | 1 | 5228 tags=39%, list=25%, signal=52% |
| 0.5917541  | 1 | 3811 tags=43%, list=18%, signal=53% |
| 0.5920025  | 1 | 4578 tags=25%, list=22%, signal=32% |
| 0.5906752  | 1 | 3598 tags=34%, list=17%, signal=40% |
| 0.59014744 | 1 | 3657 tags=24%, list=18%, signal=29% |
| 0.59324753 | 1 | 5743 tags=37%, list=28%, signal=51% |
| 0.59236616 | 1 | 6883 tags=17%, list=33%, signal=25% |
| 0.59703034 | 1 | 3104 tags=27%, list=15%, signal=31% |
| 0.59695786 | 1 | 2647 tags=31%, list=13%, signal=36% |
| 0.5960654  | 1 | 4194 tags=14%, list=20%, signal=18% |
| 0.5927591  | 1 | 3421 tags=14%, list=17%, signal=17% |
| 0.5906606  | 1 | 1831 tags=16%, list=9%, signal=18%  |
| 0.588507   | 1 | 4451 tags=19%, list=22%, signal=23% |
| 0.5862643  | 1 | 6936 tags=36%, list=34%, signal=55% |
| 0.5866264  | 1 | 4161 tags=31%, list=20%, signal=38% |
| 0.5843848  | 1 | 5057 tags=31%, list=24%, signal=40% |
| 0.58359927 | 1 | 5730 tags=33%, list=28%, signal=46% |
| 0.5809397  | 1 | 4074 tags=34%, list=20%, signal=42% |
| 0.58154494 | 1 | 4082 tags=39%, list=20%, signal=48% |
| 0.5785744  | 1 | 3609 tags=27%, list=17%, signal=32% |
| 0.58235854 | 1 | 4932 tags=36%, list=24%, signal=47% |
| 0.5848209  | 1 | 4747 tags=37%, list=23%, signal=47% |
| 0.58100474 | 1 | 5590 tags=47%, list=27%, signal=64% |
| 0.58050853 | 1 | 4546 tags=29%, list=22%, signal=37% |
| 0.5797766  | 1 | 2987 tags=23%, list=14%, signal=27% |
| 0.5789995  | 1 | 3371 tags=26%, list=16%, signal=31% |
| 0.5804931  | 1 | 4006 tags=36%, list=19%, signal=44% |
| 0.5762562  | 1 | 2104 tags=20%, list=10%, signal=22% |
| 0.5820624  | 1 | 3312 tags=50%, list=16%, signal=59% |
| 0.5825581  | 1 | 5499 tags=25%, list=27%, signal=33% |
| 0.58542204 | 1 | 6675 tags=38%, list=32%, signal=57% |
| 0.5867274  | 1 | 5517 tags=22%, list=27%, signal=30% |
| 0.5867536  | 1 | 4528 tags=32%, list=22%, signal=41% |
| 0.58476967 | 1 | 4948 tags=42%, list=24%, signal=55% |
| 0.5882544  | 1 | 4636 tags=46%, list=22%, signal=59% |

|            |   |                                     |
|------------|---|-------------------------------------|
| 0.5886868  | 1 | 3788 tags=28%, list=18%, signal=34% |
| 0.5867218  | 1 | 5747 tags=39%, list=28%, signal=54% |
| 0.59378177 | 1 | 3926 tags=36%, list=19%, signal=44% |
| 0.59042704 | 1 | 6778 tags=35%, list=33%, signal=52% |
| 0.5898272  | 1 | 3069 tags=21%, list=15%, signal=24% |
| 0.5906982  | 1 | 2295 tags=22%, list=11%, signal=25% |
| 0.5890965  | 1 | 5075 tags=37%, list=25%, signal=48% |
| 0.589688   | 1 | 4906 tags=42%, list=24%, signal=55% |
| 0.5975913  | 1 | 4274 tags=26%, list=21%, signal=32% |
| 0.5951627  | 1 | 4079 tags=25%, list=20%, signal=30% |
| 0.5950435  | 1 | 5605 tags=27%, list=27%, signal=37% |
| 0.59853905 | 1 | 5291 tags=32%, list=26%, signal=43% |
| 0.59721494 | 1 | 4049 tags=22%, list=20%, signal=28% |
| 0.5954341  | 1 | 3395 tags=22%, list=16%, signal=26% |
| 0.5934901  | 1 | 4174 tags=26%, list=20%, signal=32% |
| 0.5960114  | 1 | 3793 tags=38%, list=18%, signal=46% |
| 0.5947769  | 1 | 3421 tags=12%, list=17%, signal=14% |
| 0.5937152  | 1 | 3644 tags=30%, list=18%, signal=36% |
| 0.59407055 | 1 | 6081 tags=40%, list=29%, signal=56% |
| 0.5969833  | 1 | 5415 tags=40%, list=26%, signal=54% |
| 0.59567636 | 1 | 2482 tags=24%, list=12%, signal=27% |
| 0.5958784  | 1 | 1706 tags=17%, list=8%, signal=18%  |
| 0.59416145 | 1 | 4939 tags=30%, list=24%, signal=39% |
| 0.59384644 | 1 | 4148 tags=30%, list=20%, signal=37% |
| 0.5960231  | 1 | 3279 tags=30%, list=16%, signal=35% |
| 0.58993334 | 1 | 5009 tags=25%, list=24%, signal=33% |
| 0.5850112  | 1 | 3291 tags=27%, list=16%, signal=32% |
| 0.584486   | 1 | 4167 tags=33%, list=20%, signal=41% |
| 0.5869099  | 1 | 4200 tags=30%, list=20%, signal=37% |
| 0.5860606  | 1 | 2331 tags=22%, list=11%, signal=24% |
| 0.5857997  | 1 | 4576 tags=45%, list=22%, signal=57% |
| 0.58693165 | 1 | 3598 tags=31%, list=17%, signal=37% |
| 0.5876066  | 1 | 4516 tags=38%, list=22%, signal=48% |
| 0.58634216 | 1 | 4527 tags=30%, list=22%, signal=37% |
| 0.5897529  | 1 | 4505 tags=37%, list=22%, signal=48% |
| 0.58908826 | 1 | 4477 tags=36%, list=22%, signal=45% |
| 0.58901745 | 1 | 4244 tags=27%, list=21%, signal=34% |
| 0.58788586 | 1 | 5277 tags=30%, list=26%, signal=40% |
| 0.58906096 | 1 | 3651 tags=28%, list=18%, signal=34% |
| 0.58766145 | 1 | 3507 tags=29%, list=17%, signal=35% |
| 0.58510125 | 1 | 4357 tags=33%, list=21%, signal=42% |

|            |   |                                     |
|------------|---|-------------------------------------|
| 0.58208704 | 1 | 4603 tags=24%, list=22%, signal=30% |
| 0.5795801  | 1 | 3571 tags=18%, list=17%, signal=21% |
| 0.57901055 | 1 | 3580 tags=29%, list=17%, signal=36% |
| 0.5771417  | 1 | 3513 tags=20%, list=17%, signal=24% |
| 0.57690465 | 1 | 2568 tags=21%, list=12%, signal=24% |
| 0.576414   | 1 | 4000 tags=46%, list=19%, signal=57% |
| 0.5756489  | 1 | 4332 tags=40%, list=21%, signal=51% |
| 0.57804626 | 1 | 4162 tags=28%, list=20%, signal=35% |
| 0.578769   | 1 | 3833 tags=28%, list=19%, signal=34% |
| 0.5808148  | 1 | 4932 tags=31%, list=24%, signal=41% |
| 0.5793568  | 1 | 3111 tags=28%, list=15%, signal=33% |
| 0.57998616 | 1 | 4588 tags=31%, list=22%, signal=40% |
| 0.58099216 | 1 | 4241 tags=24%, list=21%, signal=29% |
| 0.58354515 | 1 | 4704 tags=32%, list=23%, signal=41% |
| 0.5844047  | 1 | 2036 tags=31%, list=10%, signal=34% |
| 0.5838917  | 1 | 4904 tags=39%, list=24%, signal=51% |
| 0.58430004 | 1 | 5893 tags=31%, list=29%, signal=42% |
| 0.5825202  | 1 | 4448 tags=34%, list=22%, signal=42% |
| 0.5804106  | 1 | 4357 tags=38%, list=21%, signal=49% |
| 0.5802922  | 1 | 4665 tags=26%, list=23%, signal=33% |
| 0.57892007 | 1 | 4505 tags=45%, list=22%, signal=58% |
| 0.5793807  | 1 | 2891 tags=24%, list=14%, signal=27% |
| 0.57964796 | 1 | 2944 tags=23%, list=14%, signal=27% |
| 0.57897615 | 1 | 2450 tags=28%, list=12%, signal=32% |
| 0.5801868  | 1 | 4221 tags=31%, list=20%, signal=39% |
| 0.5797548  | 1 | 2891 tags=25%, list=14%, signal=29% |
| 0.5828666  | 1 | 3782 tags=25%, list=18%, signal=30% |
| 0.5830644  | 1 | 1955 tags=17%, list=9%, signal=19%  |
| 0.5851742  | 1 | 4874 tags=35%, list=24%, signal=45% |
| 0.5856449  | 1 | 4913 tags=30%, list=24%, signal=39% |
| 0.5887774  | 1 | 4124 tags=38%, list=20%, signal=48% |
| 0.58839154 | 1 | 4693 tags=36%, list=23%, signal=46% |
| 0.58698815 | 1 | 5062 tags=33%, list=25%, signal=43% |
| 0.5899237  | 1 | 3659 tags=21%, list=18%, signal=26% |
| 0.5900852  | 1 | 4297 tags=27%, list=21%, signal=34% |
| 0.59288263 | 1 | 5982 tags=44%, list=29%, signal=61% |
| 0.59381175 | 1 | 5461 tags=44%, list=26%, signal=59% |
| 0.5924586  | 1 | 4850 tags=48%, list=23%, signal=63% |
| 0.5925395  | 1 | 4289 tags=34%, list=21%, signal=43% |
| 0.59511673 | 1 | 3665 tags=26%, list=18%, signal=31% |
| 0.59471124 | 1 | 4612 tags=29%, list=22%, signal=37% |

|            |   |                                     |
|------------|---|-------------------------------------|
| 0.5957317  | 1 | 3990 tags=29%, list=19%, signal=36% |
| 0.5937765  | 1 | 4399 tags=23%, list=21%, signal=29% |
| 0.5942407  | 1 | 4461 tags=35%, list=22%, signal=45% |
| 0.593909   | 1 | 5488 tags=40%, list=27%, signal=54% |
| 0.5923268  | 1 | 5155 tags=42%, list=25%, signal=56% |
| 0.5910272  | 1 | 5768 tags=36%, list=28%, signal=50% |
| 0.5903957  | 1 | 4772 tags=28%, list=23%, signal=36% |
| 0.58971024 | 1 | 4471 tags=36%, list=22%, signal=46% |
| 0.5933656  | 1 | 5114 tags=26%, list=25%, signal=35% |
| 0.5928606  | 1 | 5872 tags=41%, list=28%, signal=57% |
| 0.5952169  | 1 | 4448 tags=36%, list=22%, signal=46% |
| 0.59520847 | 1 | 4932 tags=37%, list=24%, signal=48% |
| 0.5942609  | 1 | 2649 tags=26%, list=13%, signal=30% |
| 0.60144293 | 1 | 6707 tags=38%, list=32%, signal=56% |
| 0.60097796 | 1 | 4330 tags=38%, list=21%, signal=48% |
| 0.60032755 | 1 | 3636 tags=33%, list=18%, signal=40% |
| 0.59972906 | 1 | 4772 tags=23%, list=23%, signal=29% |
| 0.60102946 | 1 | 6106 tags=37%, list=30%, signal=52% |
| 0.60358876 | 1 | 4348 tags=19%, list=21%, signal=24% |
| 0.602535   | 1 | 3571 tags=30%, list=17%, signal=36% |
| 0.6049046  | 1 | 4954 tags=28%, list=24%, signal=37% |
| 0.6050437  | 1 | 3757 tags=32%, list=18%, signal=39% |
| 0.60704887 | 1 | 3432 tags=26%, list=17%, signal=31% |
| 0.6047022  | 1 | 4910 tags=31%, list=24%, signal=40% |
| 0.60835487 | 1 | 2028 tags=25%, list=10%, signal=28% |
| 0.6124294  | 1 | 4237 tags=32%, list=21%, signal=40% |
| 0.61394286 | 1 | 4289 tags=25%, list=21%, signal=31% |
| 0.6159855  | 1 | 5889 tags=33%, list=29%, signal=46% |
| 0.61506826 | 1 | 6456 tags=45%, list=31%, signal=66% |
| 0.614363   | 1 | 3479 tags=24%, list=17%, signal=28% |
| 0.61503977 | 1 | 5007 tags=42%, list=24%, signal=55% |
| 0.61569035 | 1 | 3283 tags=42%, list=16%, signal=49% |
| 0.6158533  | 1 | 3914 tags=26%, list=19%, signal=31% |
| 0.61493367 | 1 | 4926 tags=41%, list=24%, signal=53% |
| 0.618284   | 1 | 1908 tags=13%, list=9%, signal=15%  |
| 0.61956346 | 1 | 4932 tags=32%, list=24%, signal=42% |
| 0.6194137  | 1 | 4274 tags=24%, list=21%, signal=30% |
| 0.62521696 | 1 | 4448 tags=35%, list=22%, signal=44% |
| 0.64052576 | 1 | 4932 tags=32%, list=24%, signal=42% |
| 0.64301807 | 1 | 5738 tags=30%, list=28%, signal=41% |
| 0.64361644 | 1 | 4422 tags=31%, list=21%, signal=39% |

|            |   |                                     |
|------------|---|-------------------------------------|
| 0.64482075 | 1 | 2137 tags=17%, list=10%, signal=19% |
| 0.6463913  | 1 | 713 tags=8%, list=3%, signal=8%     |
| 0.64846957 | 1 | 4471 tags=32%, list=22%, signal=41% |
| 0.64770925 | 1 | 1430 tags=17%, list=7%, signal=18%  |
| 0.64687914 | 1 | 5148 tags=22%, list=25%, signal=29% |
| 0.6463576  | 1 | 3412 tags=25%, list=17%, signal=29% |
| 0.64835674 | 1 | 4064 tags=27%, list=20%, signal=34% |
| 0.64728034 | 1 | 1846 tags=14%, list=9%, signal=15%  |
| 0.6483324  | 1 | 2797 tags=26%, list=14%, signal=30% |
| 0.6496459  | 1 | 4693 tags=42%, list=23%, signal=54% |
| 0.649901   | 1 | 4906 tags=39%, list=24%, signal=51% |
| 0.6505431  | 1 | 4286 tags=45%, list=21%, signal=56% |
| 0.65026623 | 1 | 3517 tags=18%, list=17%, signal=22% |
| 0.65002006 | 1 | 2746 tags=20%, list=13%, signal=23% |
| 0.65149075 | 1 | 4592 tags=28%, list=22%, signal=36% |
| 0.6508955  | 1 | 4128 tags=30%, list=20%, signal=37% |
| 0.65138716 | 1 | 6022 tags=36%, list=29%, signal=50% |
| 0.6522469  | 1 | 4695 tags=31%, list=23%, signal=40% |
| 0.6512539  | 1 | 2346 tags=16%, list=11%, signal=18% |
| 0.65093875 | 1 | 4361 tags=30%, list=21%, signal=38% |
| 0.6521203  | 1 | 1896 tags=14%, list=9%, signal=15%  |
| 0.65242857 | 1 | 2378 tags=21%, list=12%, signal=24% |
| 0.6522768  | 1 | 4016 tags=29%, list=19%, signal=36% |
| 0.65124273 | 1 | 5385 tags=40%, list=26%, signal=54% |
| 0.65608186 | 1 | 5592 tags=51%, list=27%, signal=70% |
| 0.6562465  | 1 | 2649 tags=21%, list=13%, signal=23% |
| 0.65448916 | 1 | 3371 tags=45%, list=16%, signal=54% |
| 0.65531707 | 1 | 4444 tags=27%, list=22%, signal=34% |
| 0.6591831  | 1 | 5189 tags=27%, list=25%, signal=35% |
| 0.6618066  | 1 | 5321 tags=46%, list=26%, signal=61% |
| 0.6607839  | 1 | 3733 tags=29%, list=18%, signal=35% |
| 0.6655093  | 1 | 4989 tags=39%, list=24%, signal=51% |
| 0.6645166  | 1 | 4156 tags=33%, list=20%, signal=41% |
| 0.6649716  | 1 | 1962 tags=23%, list=10%, signal=25% |
| 0.66541034 | 1 | 4455 tags=27%, list=22%, signal=34% |
| 0.66781664 | 1 | 4200 tags=31%, list=20%, signal=39% |
| 0.66967356 | 1 | 2470 tags=18%, list=12%, signal=21% |
| 0.670062   | 1 | 2625 tags=18%, list=13%, signal=20% |
| 0.67041004 | 1 | 2682 tags=29%, list=13%, signal=33% |
| 0.67017126 | 1 | 3700 tags=24%, list=18%, signal=29% |
| 0.6701157  | 1 | 4112 tags=28%, list=20%, signal=34% |

|            |   |                                     |
|------------|---|-------------------------------------|
| 0.67072797 | 1 | 4106 tags=30%, list=20%, signal=37% |
| 0.66986144 | 1 | 4950 tags=36%, list=24%, signal=47% |
| 0.66770244 | 1 | 4932 tags=38%, list=24%, signal=50% |
| 0.67185795 | 1 | 7092 tags=42%, list=34%, signal=64% |
| 0.6718568  | 1 | 4638 tags=38%, list=22%, signal=49% |
| 0.67304    | 1 | 4340 tags=26%, list=21%, signal=33% |
| 0.6722281  | 1 | 5889 tags=33%, list=29%, signal=46% |
| 0.6715932  | 1 | 3800 tags=41%, list=18%, signal=51% |
| 0.6709536  | 1 | 5074 tags=32%, list=25%, signal=42% |
| 0.67587775 | 1 | 4287 tags=29%, list=21%, signal=36% |
| 0.6757421  | 1 | 4693 tags=25%, list=23%, signal=32% |
| 0.6759344  | 1 | 4612 tags=33%, list=22%, signal=42% |
| 0.6770117  | 1 | 4287 tags=29%, list=21%, signal=37% |
| 0.67755944 | 1 | 4483 tags=28%, list=22%, signal=35% |
| 0.6792509  | 1 | 3006 tags=20%, list=15%, signal=24% |
| 0.68440735 | 1 | 4551 tags=29%, list=22%, signal=37% |
| 0.68611103 | 1 | 3409 tags=20%, list=17%, signal=24% |
| 0.687348   | 1 | 4448 tags=36%, list=22%, signal=45% |
| 0.6870338  | 1 | 4150 tags=24%, list=20%, signal=30% |
| 0.6875335  | 1 | 5116 tags=26%, list=25%, signal=34% |
| 0.6891952  | 1 | 6328 tags=41%, list=31%, signal=58% |
| 0.68972653 | 1 | 4528 tags=29%, list=22%, signal=37% |
| 0.6955346  | 1 | 4199 tags=37%, list=20%, signal=46% |
| 0.6950182  | 1 | 4948 tags=35%, list=24%, signal=46% |
| 0.69537866 | 1 | 4614 tags=35%, list=22%, signal=44% |
| 0.69455343 | 1 | 4280 tags=25%, list=21%, signal=32% |
| 0.6966989  | 1 | 5942 tags=41%, list=29%, signal=58% |
| 0.69655335 | 1 | 3346 tags=18%, list=16%, signal=22% |
| 0.6970647  | 1 | 3160 tags=24%, list=15%, signal=28% |
| 0.70111257 | 1 | 4760 tags=35%, list=23%, signal=44% |
| 0.7027837  | 1 | 5337 tags=38%, list=26%, signal=50% |
| 0.70473343 | 1 | 4357 tags=31%, list=21%, signal=39% |
| 0.7044768  | 1 | 4899 tags=33%, list=24%, signal=42% |
| 0.7051745  | 1 | 4297 tags=25%, list=21%, signal=31% |
| 0.7047961  | 1 | 4786 tags=31%, list=23%, signal=40% |
| 0.7057774  | 1 | 3869 tags=28%, list=19%, signal=35% |
| 0.70622385 | 1 | 2413 tags=19%, list=12%, signal=21% |
| 0.70556664 | 1 | 4929 tags=37%, list=24%, signal=48% |
| 0.7066158  | 1 | 6144 tags=36%, list=30%, signal=51% |
| 0.70858264 | 1 | 3360 tags=27%, list=16%, signal=33% |
| 0.70856243 | 1 | 5005 tags=39%, list=24%, signal=52% |



|            |   |                                     |
|------------|---|-------------------------------------|
| 0.7094276  | 1 | 6849 tags=36%, list=33%, signal=54% |
| 0.7085149  | 1 | 5959 tags=32%, list=29%, signal=44% |
| 0.7099039  | 1 | 4984 tags=38%, list=24%, signal=49% |
| 0.70933044 | 1 | 6056 tags=34%, list=29%, signal=48% |
| 0.7086818  | 1 | 2218 tags=21%, list=11%, signal=24% |
| 0.70876133 | 1 | 4457 tags=32%, list=22%, signal=41% |
| 0.7065688  | 1 | 3830 tags=28%, list=19%, signal=34% |
| 0.70722204 | 1 | 3734 tags=30%, list=18%, signal=36% |
| 0.7053537  | 1 | 5419 tags=20%, list=26%, signal=27% |
| 0.7061334  | 1 | 5230 tags=42%, list=25%, signal=56% |
| 0.7051189  | 1 | 6132 tags=34%, list=30%, signal=49% |
| 0.70398325 | 1 | 4760 tags=28%, list=23%, signal=36% |
| 0.70481527 | 1 | 3852 tags=17%, list=19%, signal=21% |
| 0.7036157  | 1 | 1389 tags=15%, list=7%, signal=16%  |
| 0.7037836  | 1 | 4778 tags=26%, list=23%, signal=34% |
| 0.70418304 | 1 | 4348 tags=28%, list=21%, signal=35% |
| 0.7049096  | 1 | 4949 tags=31%, list=24%, signal=40% |
| 0.70430225 | 1 | 3702 tags=33%, list=18%, signal=40% |
| 0.7074409  | 1 | 5843 tags=29%, list=28%, signal=40% |
| 0.70899653 | 1 | 5676 tags=35%, list=27%, signal=48% |
| 0.70983547 | 1 | 3617 tags=31%, list=18%, signal=38% |
| 0.70959145 | 1 | 5148 tags=41%, list=25%, signal=54% |
| 0.710433   | 1 | 1618 tags=14%, list=8%, signal=15%  |
| 0.71106017 | 1 | 4385 tags=40%, list=21%, signal=51% |
| 0.71154296 | 1 | 3598 tags=27%, list=17%, signal=32% |
| 0.7114284  | 1 | 4697 tags=33%, list=23%, signal=43% |
| 0.7131893  | 1 | 3835 tags=24%, list=19%, signal=29% |
| 0.71639127 | 1 | 2896 tags=22%, list=14%, signal=25% |
| 0.71700716 | 1 | 3877 tags=26%, list=19%, signal=31% |
| 0.7159303  | 1 | 5723 tags=38%, list=28%, signal=53% |
| 0.717108   | 1 | 3665 tags=33%, list=18%, signal=40% |
| 0.71649617 | 1 | 4247 tags=19%, list=21%, signal=24% |
| 0.71581614 | 1 | 4086 tags=34%, list=20%, signal=42% |
| 0.71543586 | 1 | 5098 tags=24%, list=25%, signal=32% |
| 0.71485656 | 1 | 3778 tags=29%, list=18%, signal=34% |
| 0.7145619  | 1 | 3245 tags=30%, list=16%, signal=35% |
| 0.7159623  | 1 | 4418 tags=31%, list=21%, signal=39% |
| 0.7193832  | 1 | 5465 tags=32%, list=26%, signal=43% |
| 0.7175988  | 1 | 5073 tags=30%, list=25%, signal=39% |
| 0.7168213  | 1 | 3090 tags=20%, list=15%, signal=24% |
| 0.7177275  | 1 | 3090 tags=20%, list=15%, signal=24% |

|            |   |                                     |
|------------|---|-------------------------------------|
| 0.7172012  | 1 | 3811 tags=20%, list=18%, signal=25% |
| 0.7165536  | 1 | 6151 tags=31%, list=30%, signal=43% |
| 0.7167536  | 1 | 5396 tags=44%, list=26%, signal=59% |
| 0.7174391  | 1 | 2331 tags=25%, list=11%, signal=28% |
| 0.71747434 | 1 | 4966 tags=26%, list=24%, signal=34% |
| 0.7197615  | 1 | 2923 tags=19%, list=14%, signal=22% |
| 0.7185303  | 1 | 4573 tags=22%, list=22%, signal=28% |
| 0.7181717  | 1 | 5377 tags=34%, list=26%, signal=45% |
| 0.71828485 | 1 | 1870 tags=16%, list=9%, signal=18%  |
| 0.71816605 | 1 | 4932 tags=36%, list=24%, signal=47% |
| 0.71767217 | 1 | 4036 tags=29%, list=20%, signal=35% |
| 0.7165357  | 1 | 3099 tags=21%, list=15%, signal=25% |
| 0.71785575 | 1 | 4111 tags=27%, list=20%, signal=33% |
| 0.7241462  | 1 | 5057 tags=28%, list=24%, signal=36% |
| 0.7249066  | 1 | 5592 tags=36%, list=27%, signal=50% |
| 0.7240602  | 1 | 6151 tags=35%, list=30%, signal=49% |
| 0.7239619  | 1 | 4981 tags=30%, list=24%, signal=38% |
| 0.72767645 | 1 | 3726 tags=14%, list=18%, signal=17% |
| 0.7291575  | 1 | 2625 tags=15%, list=13%, signal=18% |
| 0.73271024 | 1 | 1482 tags=8%, list=7%, signal=9%    |
| 0.73280656 | 1 | 4910 tags=25%, list=24%, signal=33% |
| 0.7369195  | 1 | 4252 tags=26%, list=21%, signal=33% |
| 0.7392161  | 1 | 4058 tags=30%, list=20%, signal=37% |
| 0.73907095 | 1 | 2151 tags=22%, list=10%, signal=24% |
| 0.73956656 | 1 | 5451 tags=40%, list=26%, signal=53% |
| 0.7416351  | 1 | 3947 tags=29%, list=19%, signal=36% |
| 0.7408972  | 1 | 2629 tags=20%, list=13%, signal=23% |
| 0.74070275 | 1 | 3861 tags=25%, list=19%, signal=31% |
| 0.7407003  | 1 | 3467 tags=23%, list=17%, signal=28% |
| 0.740237   | 1 | 5453 tags=30%, list=26%, signal=41% |
| 0.7398646  | 1 | 4319 tags=37%, list=21%, signal=46% |
| 0.74392784 | 1 | 2147 tags=22%, list=10%, signal=25% |
| 0.7438244  | 1 | 5207 tags=26%, list=25%, signal=35% |
| 0.74575824 | 1 | 5296 tags=35%, list=26%, signal=47% |
| 0.7454543  | 1 | 4485 tags=18%, list=22%, signal=23% |
| 0.74975795 | 1 | 3286 tags=22%, list=16%, signal=25% |
| 0.7498007  | 1 | 917 tags=12%, list=4%, signal=13%   |
| 0.75267106 | 1 | 4775 tags=32%, list=23%, signal=41% |
| 0.7514346  | 1 | 3628 tags=25%, list=18%, signal=31% |
| 0.7508368  | 1 | 3064 tags=16%, list=15%, signal=19% |
| 0.7517423  | 1 | 5116 tags=26%, list=25%, signal=34% |

|            |   |                                     |
|------------|---|-------------------------------------|
| 0.75165033 | 1 | 3226 tags=27%, list=16%, signal=31% |
| 0.7517913  | 1 | 5463 tags=32%, list=26%, signal=44% |
| 0.7527936  | 1 | 2388 tags=17%, list=12%, signal=20% |
| 0.7526757  | 1 | 4901 tags=38%, list=24%, signal=50% |
| 0.75349367 | 1 | 1668 tags=14%, list=8%, signal=15%  |
| 0.75281686 | 1 | 5451 tags=40%, list=26%, signal=53% |
| 0.7523112  | 1 | 4646 tags=16%, list=23%, signal=20% |
| 0.7529712  | 1 | 2393 tags=14%, list=12%, signal=15% |
| 0.75308114 | 1 | 6037 tags=34%, list=29%, signal=48% |
| 0.75263536 | 1 | 4247 tags=27%, list=21%, signal=34% |
| 0.7591629  | 1 | 3642 tags=19%, list=18%, signal=23% |
| 0.7602618  | 1 | 2511 tags=16%, list=12%, signal=18% |
| 0.7596339  | 1 | 3907 tags=32%, list=19%, signal=39% |
| 0.7604276  | 1 | 5532 tags=35%, list=27%, signal=46% |
| 0.7638687  | 1 | 2956 tags=22%, list=14%, signal=25% |
| 0.7653799  | 1 | 4387 tags=30%, list=21%, signal=38% |
| 0.76460695 | 1 | 4830 tags=25%, list=23%, signal=33% |
| 0.7641924  | 1 | 3041 tags=19%, list=15%, signal=22% |
| 0.7684977  | 1 | 4949 tags=24%, list=24%, signal=31% |
| 0.7692532  | 1 | 4392 tags=32%, list=21%, signal=40% |
| 0.767205   | 1 | 4950 tags=30%, list=24%, signal=39% |
| 0.77183247 | 1 | 4950 tags=37%, list=24%, signal=48% |
| 0.7710026  | 1 | 2426 tags=19%, list=12%, signal=22% |
| 0.771966   | 1 | 2427 tags=21%, list=12%, signal=23% |
| 0.7716122  | 1 | 4625 tags=28%, list=22%, signal=35% |
| 0.77140766 | 1 | 4247 tags=26%, list=21%, signal=33% |
| 0.7710647  | 1 | 4020 tags=34%, list=19%, signal=42% |
| 0.7705626  | 1 | 4667 tags=17%, list=23%, signal=21% |
| 0.7718612  | 1 | 2259 tags=23%, list=11%, signal=25% |
| 0.7753771  | 1 | 4743 tags=28%, list=23%, signal=36% |
| 0.7746994  | 1 | 3449 tags=24%, list=17%, signal=28% |
| 0.7743257  | 1 | 6200 tags=35%, list=30%, signal=50% |
| 0.7739306  | 1 | 2511 tags=19%, list=12%, signal=21% |
| 0.7726038  | 1 | 3038 tags=23%, list=15%, signal=26% |
| 0.77219224 | 1 | 4932 tags=26%, list=24%, signal=34% |
| 0.771212   | 1 | 4364 tags=31%, list=21%, signal=39% |
| 0.7742111  | 1 | 5249 tags=36%, list=25%, signal=47% |
| 0.7736224  | 1 | 4447 tags=28%, list=22%, signal=36% |
| 0.7748877  | 1 | 4474 tags=30%, list=22%, signal=39% |
| 0.7763776  | 1 | 3757 tags=33%, list=18%, signal=40% |
| 0.77693933 | 1 | 3870 tags=24%, list=19%, signal=29% |

|            |   |                                     |
|------------|---|-------------------------------------|
| 0.7761733  | 1 | 6607 tags=35%, list=32%, signal=52% |
| 0.77841806 | 1 | 2138 tags=13%, list=10%, signal=14% |
| 0.7787128  | 1 | 3907 tags=34%, list=19%, signal=42% |
| 0.7800891  | 1 | 5987 tags=32%, list=29%, signal=45% |
| 0.7809371  | 1 | 1494 tags=14%, list=7%, signal=15%  |
| 0.7824771  | 1 | 3571 tags=21%, list=17%, signal=26% |
| 0.7857889  | 1 | 3237 tags=23%, list=16%, signal=27% |
| 0.7856398  | 1 | 5182 tags=30%, list=25%, signal=39% |
| 0.7855829  | 1 | 5116 tags=24%, list=25%, signal=32% |
| 0.78515565 | 1 | 3843 tags=25%, list=19%, signal=31% |
| 0.7841413  | 1 | 3630 tags=33%, list=18%, signal=40% |
| 0.78339493 | 1 | 5091 tags=25%, list=25%, signal=32% |
| 0.78284675 | 1 | 2975 tags=22%, list=14%, signal=26% |
| 0.7826097  | 1 | 2660 tags=23%, list=13%, signal=26% |
| 0.7847617  | 1 | 3914 tags=23%, list=19%, signal=28% |
| 0.7848363  | 1 | 6392 tags=31%, list=31%, signal=44% |
| 0.7881269  | 1 | 3339 tags=22%, list=16%, signal=26% |
| 0.78650934 | 1 | 4533 tags=25%, list=22%, signal=32% |
| 0.7867585  | 1 | 5915 tags=37%, list=29%, signal=51% |
| 0.7884564  | 1 | 4180 tags=32%, list=20%, signal=39% |
| 0.7883788  | 1 | 4447 tags=26%, list=22%, signal=33% |
| 0.78973067 | 1 | 4690 tags=31%, list=23%, signal=39% |
| 0.78994906 | 1 | 3261 tags=23%, list=16%, signal=27% |
| 0.79018784 | 1 | 3782 tags=21%, list=18%, signal=25% |
| 0.7903022  | 1 | 5408 tags=27%, list=26%, signal=37% |
| 0.7921777  | 1 | 5542 tags=20%, list=27%, signal=27% |
| 0.79138947 | 1 | 5083 tags=31%, list=25%, signal=41% |
| 0.7913491  | 1 | 1537 tags=10%, list=7%, signal=11%  |
| 0.7910253  | 1 | 4737 tags=25%, list=23%, signal=32% |
| 0.79381025 | 1 | 3208 tags=28%, list=16%, signal=33% |
| 0.7934238  | 1 | 3514 tags=23%, list=17%, signal=27% |
| 0.793676   | 1 | 3636 tags=26%, list=18%, signal=31% |
| 0.7950737  | 1 | 4362 tags=27%, list=21%, signal=34% |
| 0.7965803  | 1 | 4001 tags=35%, list=19%, signal=43% |
| 0.79612964 | 1 | 3636 tags=29%, list=18%, signal=36% |
| 0.7964702  | 1 | 1827 tags=21%, list=9%, signal=23%  |
| 0.7971507  | 1 | 3705 tags=21%, list=18%, signal=26% |
| 0.79742974 | 1 | 4373 tags=27%, list=21%, signal=34% |
| 0.7973822  | 1 | 4615 tags=41%, list=22%, signal=53% |
| 0.79832345 | 1 | 3204 tags=27%, list=16%, signal=32% |
| 0.79686415 | 1 | 3404 tags=18%, list=16%, signal=21% |

|            |   |                                     |
|------------|---|-------------------------------------|
| 0.7971185  | 1 | 3851 tags=17%, list=19%, signal=21% |
| 0.7976255  | 1 | 5409 tags=30%, list=26%, signal=41% |
| 0.8015551  | 1 | 4386 tags=15%, list=21%, signal=19% |
| 0.8019722  | 1 | 4643 tags=33%, list=22%, signal=42% |
| 0.80142105 | 1 | 4620 tags=30%, list=22%, signal=38% |
| 0.79959375 | 1 | 3369 tags=23%, list=16%, signal=27% |
| 0.79969794 | 1 | 3204 tags=26%, list=16%, signal=31% |
| 0.80214524 | 1 | 4294 tags=12%, list=21%, signal=14% |
| 0.8034847  | 1 | 5409 tags=30%, list=26%, signal=41% |
| 0.80295575 | 1 | 1876 tags=9%, list=9%, signal=9%    |
| 0.805005   | 1 | 5792 tags=32%, list=28%, signal=44% |
| 0.805034   | 1 | 3283 tags=38%, list=16%, signal=45% |
| 0.8056708  | 1 | 2963 tags=18%, list=14%, signal=21% |
| 0.8071306  | 1 | 4181 tags=37%, list=20%, signal=46% |
| 0.80687094 | 1 | 4055 tags=22%, list=20%, signal=26% |
| 0.8071735  | 1 | 4282 tags=24%, list=21%, signal=30% |
| 0.80773675 | 1 | 2850 tags=24%, list=14%, signal=27% |
| 0.8075083  | 1 | 4535 tags=23%, list=22%, signal=29% |
| 0.8085853  | 1 | 3113 tags=23%, list=15%, signal=27% |
| 0.80835515 | 1 | 3570 tags=28%, list=17%, signal=34% |
| 0.8116197  | 1 | 4405 tags=24%, list=21%, signal=31% |
| 0.8116903  | 1 | 2741 tags=16%, list=13%, signal=18% |
| 0.81686664 | 1 | 3869 tags=28%, list=19%, signal=35% |
| 0.8161584  | 1 | 5987 tags=25%, list=29%, signal=36% |
| 0.815711   | 1 | 4669 tags=33%, list=23%, signal=42% |
| 0.81867796 | 1 | 4055 tags=22%, list=20%, signal=26% |
| 0.8186287  | 1 | 4863 tags=23%, list=24%, signal=30% |
| 0.8184995  | 1 | 4169 tags=22%, list=20%, signal=27% |
| 0.8185203  | 1 | 3053 tags=21%, list=15%, signal=25% |
| 0.8186805  | 1 | 3217 tags=21%, list=16%, signal=25% |
| 0.82025164 | 1 | 4698 tags=27%, list=23%, signal=35% |
| 0.8211791  | 1 | 4436 tags=21%, list=21%, signal=26% |
| 0.82117176 | 1 | 4579 tags=21%, list=22%, signal=27% |
| 0.8245389  | 1 | 1537 tags=16%, list=7%, signal=17%  |
| 0.830796   | 1 | 3138 tags=30%, list=15%, signal=35% |
| 0.8317423  | 1 | 4605 tags=28%, list=22%, signal=36% |
| 0.8335642  | 1 | 3781 tags=21%, list=18%, signal=26% |
| 0.83297694 | 1 | 2921 tags=19%, list=14%, signal=22% |
| 0.83755994 | 1 | 4737 tags=27%, list=23%, signal=35% |
| 0.83909327 | 1 | 4904 tags=27%, list=24%, signal=35% |
| 0.83944726 | 1 | 3869 tags=30%, list=19%, signal=36% |

|            |   |                                     |
|------------|---|-------------------------------------|
| 0.8462576  | 1 | 3276 tags=22%, list=16%, signal=26% |
| 0.84699035 | 1 | 6561 tags=24%, list=32%, signal=35% |
| 0.8473517  | 1 | 6609 tags=28%, list=32%, signal=41% |
| 0.8470172  | 1 | 3309 tags=19%, list=16%, signal=22% |
| 0.847468   | 1 | 4457 tags=33%, list=22%, signal=42% |
| 0.8491589  | 1 | 3467 tags=12%, list=17%, signal=14% |
| 0.8486426  | 1 | 5846 tags=31%, list=28%, signal=43% |
| 0.85254353 | 1 | 2620 tags=21%, list=13%, signal=24% |
| 0.85317844 | 1 | 3867 tags=19%, list=19%, signal=24% |
| 0.8533981  | 1 | 3501 tags=29%, list=17%, signal=35% |
| 0.8549668  | 1 | 2531 tags=19%, list=12%, signal=21% |
| 0.8571804  | 1 | 4932 tags=27%, list=24%, signal=35% |
| 0.86107254 | 1 | 2117 tags=23%, list=10%, signal=25% |
| 0.8616159  | 1 | 4915 tags=28%, list=24%, signal=36% |
| 0.86171335 | 1 | 2427 tags=26%, list=12%, signal=30% |
| 0.86138815 | 1 | 4267 tags=28%, list=21%, signal=35% |
| 0.8631193  | 1 | 4218 tags=22%, list=20%, signal=28% |
| 0.8626356  | 1 | 3851 tags=21%, list=19%, signal=26% |
| 0.86456263 | 1 | 4901 tags=32%, list=24%, signal=42% |
| 0.86778504 | 1 | 2140 tags=20%, list=10%, signal=22% |
| 0.8678741  | 1 | 4867 tags=32%, list=24%, signal=42% |
| 0.8696066  | 1 | 4339 tags=26%, list=21%, signal=33% |
| 0.86860967 | 1 | 3259 tags=21%, list=16%, signal=25% |
| 0.86794496 | 1 | 3683 tags=21%, list=18%, signal=25% |
| 0.867386   | 1 | 5843 tags=41%, list=28%, signal=57% |
| 0.8666802  | 1 | 4417 tags=28%, list=21%, signal=36% |
| 0.8674956  | 1 | 4461 tags=27%, list=22%, signal=34% |
| 0.86954576 | 1 | 4702 tags=32%, list=23%, signal=42% |
| 0.86913085 | 1 | 3914 tags=25%, list=19%, signal=30% |
| 0.8725282  | 1 | 6260 tags=29%, list=30%, signal=42% |
| 0.8735348  | 1 | 3507 tags=20%, list=17%, signal=24% |
| 0.8768328  | 1 | 4457 tags=32%, list=22%, signal=40% |
| 0.87878484 | 1 | 1788 tags=13%, list=9%, signal=14%  |
| 0.8785637  | 1 | 2590 tags=13%, list=13%, signal=15% |
| 0.87752753 | 1 | 6320 tags=32%, list=31%, signal=46% |
| 0.87796146 | 1 | 1389 tags=11%, list=7%, signal=12%  |
| 0.87721825 | 1 | 5070 tags=37%, list=25%, signal=49% |
| 0.8770676  | 1 | 3041 tags=18%, list=15%, signal=21% |
| 0.8788891  | 1 | 3717 tags=21%, list=18%, signal=25% |
| 0.8785582  | 1 | 1575 tags=13%, list=8%, signal=13%  |
| 0.87832344 | 1 | 2982 tags=11%, list=14%, signal=12% |

|            |   |                                     |
|------------|---|-------------------------------------|
| 0.87871486 | 1 | 4795 tags=29%, list=23%, signal=38% |
| 0.8815754  | 1 | 3639 tags=23%, list=18%, signal=28% |
| 0.88117063 | 1 | 3621 tags=25%, list=18%, signal=30% |
| 0.8818793  | 1 | 2428 tags=19%, list=12%, signal=22% |
| 0.8816684  | 1 | 1444 tags=14%, list=7%, signal=16%  |
| 0.8841892  | 1 | 4124 tags=25%, list=20%, signal=31% |
| 0.88838387 | 1 | 4294 tags=9%, list=21%, signal=12%  |
| 0.88877654 | 1 | 3204 tags=22%, list=16%, signal=26% |
| 0.89460963 | 1 | 2667 tags=19%, list=13%, signal=22% |
| 0.89410865 | 1 | 4533 tags=35%, list=22%, signal=44% |
| 0.8937877  | 1 | 3518 tags=12%, list=17%, signal=14% |
| 0.89228904 | 1 | 4119 tags=26%, list=20%, signal=32% |
| 0.8927257  | 1 | 4592 tags=26%, list=22%, signal=32% |
| 0.8956885  | 1 | 4067 tags=24%, list=20%, signal=30% |
| 0.89600325 | 1 | 4562 tags=23%, list=22%, signal=30% |
| 0.9003468  | 1 | 3291 tags=11%, list=16%, signal=13% |
| 0.8993345  | 1 | 4901 tags=22%, list=24%, signal=29% |
| 0.89956295 | 1 | 4902 tags=19%, list=24%, signal=25% |
| 0.90016043 | 1 | 4737 tags=30%, list=23%, signal=38% |
| 0.8997729  | 1 | 3611 tags=15%, list=17%, signal=18% |
| 0.90048414 | 1 | 4690 tags=25%, list=23%, signal=32% |
| 0.8999149  | 1 | 5590 tags=37%, list=27%, signal=51% |
| 0.9032547  | 1 | 3622 tags=17%, list=18%, signal=21% |
| 0.9037663  | 1 | 5052 tags=27%, list=24%, signal=35% |
| 0.90336764 | 1 | 4294 tags=13%, list=21%, signal=16% |
| 0.9016583  | 1 | 3518 tags=13%, list=17%, signal=16% |
| 0.9044607  | 1 | 3079 tags=22%, list=15%, signal=25% |
| 0.91221786 | 1 | 4615 tags=31%, list=22%, signal=40% |
| 0.91811436 | 1 | 3467 tags=25%, list=17%, signal=30% |
| 0.92007405 | 1 | 4089 tags=25%, list=20%, signal=30% |
| 0.9225974  | 1 | 4766 tags=32%, list=23%, signal=42% |
| 0.92265356 | 1 | 2427 tags=15%, list=12%, signal=16% |
| 0.9238122  | 1 | 3666 tags=21%, list=18%, signal=26% |
| 0.9240214  | 1 | 4748 tags=31%, list=23%, signal=40% |
| 0.92345333 | 1 | 3361 tags=23%, list=16%, signal=27% |
| 0.92303437 | 1 | 3464 tags=22%, list=17%, signal=26% |
| 0.9225708  | 1 | 3659 tags=15%, list=18%, signal=19% |
| 0.9222607  | 1 | 4722 tags=31%, list=23%, signal=39% |
| 0.92257565 | 1 | 5346 tags=29%, list=26%, signal=39% |
| 0.9236681  | 1 | 1791 tags=14%, list=9%, signal=15%  |
| 0.92851853 | 1 | 4390 tags=24%, list=21%, signal=30% |

|            |   |                                     |
|------------|---|-------------------------------------|
| 0.93053555 | 1 | 4020 tags=33%, list=19%, signal=40% |
| 0.93077946 | 1 | 5743 tags=29%, list=28%, signal=40% |
| 0.93122995 | 1 | 4422 tags=26%, list=21%, signal=33% |
| 0.931458   | 1 | 2170 tags=10%, list=11%, signal=11% |
| 0.93200356 | 1 | 4678 tags=29%, list=23%, signal=36% |
| 0.9314999  | 1 | 3035 tags=20%, list=15%, signal=23% |
| 0.93147206 | 1 | 3069 tags=12%, list=15%, signal=14% |
| 0.9311121  | 1 | 3118 tags=21%, list=15%, signal=24% |
| 0.9551761  | 1 | 3347 tags=19%, list=16%, signal=22% |
| 0.9579898  | 1 | 3195 tags=23%, list=15%, signal=27% |
| 0.96057785 | 1 | 5989 tags=27%, list=29%, signal=39% |
| 0.9614316  | 1 | 3316 tags=22%, list=16%, signal=26% |
| 0.9615646  | 1 | 4349 tags=32%, list=21%, signal=40% |
| 0.9642992  | 1 | 6069 tags=33%, list=29%, signal=46% |
| 0.96357894 | 1 | 5091 tags=32%, list=25%, signal=42% |
| 0.96528167 | 1 | 5542 tags=28%, list=27%, signal=38% |
| 0.96745574 | 1 | 3460 tags=26%, list=17%, signal=31% |
| 0.9718703  | 1 | 2366 tags=14%, list=11%, signal=16% |
| 0.97380346 | 1 | 5076 tags=30%, list=25%, signal=39% |
| 0.9739346  | 1 | 5942 tags=26%, list=29%, signal=37% |
| 0.97672886 | 1 | 2778 tags=17%, list=13%, signal=20% |
| 0.98626447 | 1 | 4221 tags=25%, list=20%, signal=32% |



| GSEA naïve  | SIZE | ES         | NES        | NOM p-val  | FDR q-val  | FWER p-val |
|-------------|------|------------|------------|------------|------------|------------|
| KIM_MYC_AM  | 153  | -0.6418862 | -1.661922  | 0          | 0.6891278  | 0.324      |
| DANG_MYC_   | 116  | -0.6832407 | -1.652132  | 0          | 0.43988755 | 0.352      |
| SCHUHMACH   | 63   | -0.817979  | -1.6110455 | 0          | 0.25020444 | 0.473      |
| YAO_TEMPOI  | 81   | -0.6587936 | -1.6020976 | 0.0815534  | 0.28732654 | 0.501      |
| REACTOME_S  | 85   | -0.7153829 | -1.5868316 | 0          | 0.21152626 | 0.557      |
| MANALO_HY   | 255  | -0.6841856 | -1.5834608 | 0.06324111 | 0.20916107 | 0.566      |
| REACTOME_S  | 98   | -0.7008486 | -1.5818608 | 0.03168317 | 0.20364259 | 0.566      |
| WONG_EMBI   | 302  | -0.6793587 | -1.5818086 | 0.03285421 | 0.19316247 | 0.566      |
| REACTOME_C  | 105  | -0.6598846 | -1.5693891 | 0.03149606 | 0.221453   | 0.61       |
| RHEIN_ALL_C | 339  | -0.5827666 | -1.5688276 | 0.06694561 | 0.21219218 | 0.61       |
| CHIANG_LIVE | 156  | -0.6157149 | -1.5678009 | 0.06570842 | 0.20445858 | 0.61       |
| RHODES_CAN  | 52   | -0.6483098 | -1.5668383 | 0.03271984 | 0.19984928 | 0.63       |
| MUELLER_PLI | 269  | -0.6228557 | -1.5636499 | 0.03187251 | 0.2002651  | 0.643      |
| TONKS_TARG  | 176  | -0.5959745 | -1.5601593 | 0.03155819 | 0.19531362 | 0.643      |
| REACTOME_I  | 73   | -0.7020421 | -1.5579257 | 0.04590818 | 0.1992485  | 0.654      |
| REACTOME_M  | 67   | -0.5958011 | -1.5504525 | 0.06570842 | 0.2090527  | 0.702      |
| REACTOME_I  | 130  | -0.6225595 | -1.5427034 | 0          | 0.20632334 | 0.765      |
| DANG_REGUI  | 64   | -0.6617448 | -1.5394275 | 0          | 0.21186863 | 0.765      |
| OUELLET_OV  | 110  | -0.5868403 | -1.5334356 | 0.08571429 | 0.21875893 | 0.84       |
| GRADE_COLC  | 218  | -0.597384  | -1.5316771 | 0.06570842 | 0.19461206 | 0.84       |
| ZHANG_RESP  | 52   | -0.7133327 | -1.5276015 | 0.06324111 | 0.19499928 | 0.853      |
| TARTE_PLASM | 279  | -0.6076724 | -1.5235753 | 0.0661157  | 0.19800347 | 0.853      |
| KAUFFMANN   | 57   | -0.5837209 | -1.5086545 | 0.13402061 | 0.22657481 | 0.905      |
| YAO_TEMPOI  | 115  | -0.6559276 | -1.5030755 | 0.08414873 | 0.23975565 | 0.917      |
| HESS_TARGET | 57   | -0.5967166 | -1.5030217 | 0.05338809 | 0.235623   | 0.917      |
| REACTOME_C  | 62   | -0.7033287 | -1.4994453 | 0.10958904 | 0.23303285 | 0.933      |
| REACTOME_M  | 60   | -0.699696  | -1.4975079 | 0.08219178 | 0.23459795 | 0.933      |
| REACTOME_F  | 118  | -0.6315736 | -1.4973652 | 0.03298969 | 0.23117106 | 0.933      |
| KEGG_GLYCO  | 60   | -0.6387362 | -1.4970669 | 0.08349515 | 0.22750725 | 0.933      |
| REACTOME_T  | 101  | -0.6056638 | -1.4950502 | 0          | 0.225123   | 0.933      |
| SCHLOSSER_M | 138  | -0.7137181 | -1.4949878 | 0.06185567 | 0.22195165 | 0.933      |
| DAIRKEE_CAN | 112  | -0.5690742 | -1.4940515 | 0.08187135 | 0.2212227  | 0.933      |
| REACTOME_F  | 102  | -0.5977187 | -1.4917243 | 0.03187251 | 0.21557891 | 0.933      |
| JAIN_NFKB_S | 69   | -0.5836847 | -1.4908149 | 0.06470589 | 0.21642081 | 0.933      |
| REACTOME_L  | 90   | -0.6310243 | -1.4882547 | 0.03206413 | 0.21034057 | 0.946      |
| REACTOME_F  | 118  | -0.5834425 | -1.4852542 | 0.03258656 | 0.20320903 | 0.946      |
| FOURNIER_A  | 258  | -0.5898745 | -1.4846032 | 0.10282258 | 0.19978766 | 0.946      |
| REACTOME_M  | 87   | -0.6308053 | -1.4837458 | 0.03174603 | 0.19982329 | 0.946      |
| ZHU_CMV_AI  | 55   | -0.5565695 | -1.4835439 | 0          | 0.19853544 | 0.946      |
| REACTOME_C  | 358  | -0.5125299 | -1.48124   | 0          | 0.19557716 | 0.946      |

|             |     |            |            |            |            |       |
|-------------|-----|------------|------------|------------|------------|-------|
| REACTOME_M  | 90  | -0.6083123 | -1.4750415 | 0.08484849 | 0.1996711  | 0.959 |
| IVANOVA_HE  | 91  | -0.6128252 | -1.4735972 | 0.11637081 | 0.20092872 | 0.959 |
| REACTOME_F  | 132 | -0.5904247 | -1.4712297 | 0.03187251 | 0.19655888 | 0.959 |
| RHODES_UNI  | 59  | -0.5915229 | -1.4707505 | 0.08366534 | 0.1964494  | 0.972 |
| REACTOME_H  | 180 | -0.574705  | -1.4688153 | 0.03174603 | 0.19968574 | 0.972 |
| GOLDRATH_H  | 134 | -0.5185754 | -1.468785  | 0.06517312 | 0.19783893 | 0.972 |
| KEGG_PURIN  | 151 | -0.5744978 | -1.4685779 | 0.06547619 | 0.19673623 | 0.972 |
| REACTOME_C  | 51  | -0.7224518 | -1.468515  | 0.08219178 | 0.19507268 | 0.972 |
| REACTOME_C  | 95  | -0.6466311 | -1.4663094 | 0.17886178 | 0.19339734 | 0.972 |
| REACTOME_F  | 90  | -0.5807316 | -1.4643952 | 0.03285421 | 0.19224396 | 0.972 |
| REACTOME_E  | 114 | -0.5901226 | -1.4637014 | 0.03187251 | 0.19200082 | 0.972 |
| MOREAUX_M   | 117 | -0.5560883 | -1.4635373 | 0.13347022 | 0.1905147  | 0.972 |
| REACTOME_C  | 87  | -0.6142947 | -1.457053  | 0          | 0.19343369 | 0.972 |
| FERRANDO_T  | 73  | -0.549032  | -1.453954  | 0.084      | 0.19948883 | 0.972 |
| WINNEPENNI  | 138 | -0.5897581 | -1.4503616 | 0.13292433 | 0.20169394 | 0.972 |
| BHATTACHAR  | 67  | -0.5597349 | -1.4502351 | 0.09979633 | 0.20036604 | 0.972 |
| CHANG_CORI  | 61  | -0.5828909 | -1.4479418 | 0.17751479 | 0.203817   | 0.972 |
| GARCIA_TARC | 132 | -0.5661267 | -1.4451828 | 0.09514563 | 0.20418638 | 0.972 |
| PENG_RAPAN  | 63  | -0.6911757 | -1.4437215 | 0.08414873 | 0.20322943 | 0.972 |
| KEGG_SPLICE | 107 | -0.5519686 | -1.4406697 | 0.07216495 | 0.20831935 | 0.972 |
| SANA_RESPO  | 76  | -0.5351266 | -1.4342608 | 0.04093567 | 0.21610032 | 0.972 |
| REACTOME_C  | 60  | -0.6966596 | -1.4338229 | 0          | 0.2148472  | 0.972 |
| WANG_SMAF   | 310 | -0.4887385 | -1.4323376 | 0.0661157  | 0.21195017 | 0.972 |
| BASSO_B_LYM | 122 | -0.5484485 | -1.4323009 | 0.11545988 | 0.21065336 | 0.972 |
| BOYAULT_LIV | 158 | -0.5683063 | -1.4316065 | 0.06666667 | 0.2098184  | 0.972 |
| NAKAMURA_   | 244 | -0.5188274 | -1.4271162 | 0.05335968 | 0.21381308 | 0.972 |
| BERENJENO_  | 444 | -0.5157563 | -1.4208814 | 0.13184585 | 0.22222857 | 0.972 |
| SAKAI_TUMC  | 77  | -0.5364299 | -1.4179845 | 0.13319673 | 0.22669142 | 0.972 |
| KIM_WT1_TA  | 194 | -0.4521625 | -1.4175017 | 0          | 0.22628918 | 0.972 |
| REACTOME_A  | 55  | -0.7070924 | -1.415474  | 0.0446602  | 0.23085055 | 1     |
| GRAHAM_NC   | 81  | -0.572921  | -1.410351  | 0.19472617 | 0.23703942 | 1     |
| KEGG_PYRIM  | 88  | -0.6092678 | -1.4051157 | 0.08498024 | 0.23839638 | 1     |
| KEGG_RIBOS  | 79  | -0.6073539 | -1.4046878 | 0.0673077  | 0.23754387 | 1     |
| REACTOME_T  | 59  | -0.6175638 | -1.4040161 | 0.06457926 | 0.23615953 | 1     |
| MATTIOLI_M  | 94  | -0.4911623 | -1.4014796 | 0.06776181 | 0.23946218 | 1     |
| CROONQUIST  | 60  | -0.5654656 | -1.3994416 | 0.17907445 | 0.24166033 | 1     |
| WAKASUGI_H  | 54  | -0.568078  | -1.3991883 | 0.02169625 | 0.24099888 | 1     |
| YAO_TEMPOI  | 58  | -0.6218213 | -1.3983984 | 0.13786408 | 0.24142484 | 1     |
| REACTOME_M  | 155 | -0.5614449 | -1.3976507 | 0.04572565 | 0.24213096 | 1     |
| GRAHAM_CM   | 170 | -0.5339696 | -1.3971128 | 0.15717092 | 0.24196646 | 1     |
| REACTOME_I  | 101 | -0.5412315 | -1.395614  | 0.0503876  | 0.24417323 | 1     |

|              |     |            |            |            |            |   |
|--------------|-----|------------|------------|------------|------------|---|
| REACTOME_T   | 51  | -0.6315866 | -1.3926868 | 0.06666667 | 0.24703458 | 1 |
| REACTOME_I   | 93  | -0.6142849 | -1.3919538 | 0          | 0.24710995 | 1 |
| REACTOME_C   | 56  | -0.6808872 | -1.3915929 | 0.23483366 | 0.24663617 | 1 |
| KOKKINAKIS_  | 72  | -0.4872278 | -1.3885987 | 0.08481263 | 0.2501276  | 1 |
| REACTOME_F   | 67  | -0.6615928 | -1.3880033 | 0.1409002  | 0.25086936 | 1 |
| REACTOME_F   | 77  | -0.6015298 | -1.3872831 | 0.03696498 | 0.25080258 | 1 |
| BILD_MYC_O   | 172 | -0.5135472 | -1.3803197 | 0.08365759 | 0.26339033 | 1 |
| LEE_LIVER_C/ | 119 | -0.5009579 | -1.3802904 | 0.06666667 | 0.26221374 | 1 |
| REACTOME_\   | 78  | -0.569999  | -1.3787587 | 0.06130268 | 0.26251996 | 1 |
| PENG_GLUTA   | 75  | -0.6229199 | -1.3786939 | 0.1553398  | 0.2614286  | 1 |
| WELCSH_BRC   | 108 | -0.5780168 | -1.3726543 | 0.08349515 | 0.27350262 | 1 |
| MORI_MATU    | 54  | -0.5251288 | -1.3682581 | 0.21084337 | 0.27747488 | 1 |
| KOKKINAKIS_  | 61  | -0.4619945 | -1.3641806 | 0          | 0.28519845 | 1 |
| WONG_MITC    | 205 | -0.6559397 | -1.3640212 | 0.05273438 | 0.28293929 | 1 |
| REACTOME_I   | 119 | -0.4804048 | -1.3601166 | 0.13549618 | 0.28820944 | 1 |
| BERTUCCI_M   | 176 | -0.464394  | -1.3577771 | 0.06639839 | 0.29290646 | 1 |
| REACTOME_M   | 185 | -0.4721814 | -1.3571051 | 0.05283757 | 0.2911283  | 1 |
| SHAFFER_IRF  | 74  | -0.5180983 | -1.3556399 | 0.2813765  | 0.29101923 | 1 |
| GARY_CD5_T   | 383 | -0.5488758 | -1.3549427 | 0.13541667 | 0.2918604  | 1 |
| BORCZUK_M/   | 274 | -0.5012184 | -1.3547962 | 0.13513513 | 0.2912217  | 1 |
| TSENG_IRS1_  | 98  | -0.496733  | -1.3507485 | 0.15810277 | 0.29888135 | 1 |
| SOTIRIOU_BR  | 138 | -0.5717442 | -1.3504398 | 0.2601626  | 0.29840484 | 1 |
| CROONQUIST   | 75  | -0.5313381 | -1.3476    | 0.27290836 | 0.30465376 | 1 |
| REACTOME_F   | 78  | -0.5776159 | -1.3440849 | 0.11627907 | 0.30949172 | 1 |
| SASAKI_ADUI  | 129 | -0.4289966 | -1.3434459 | 0.06420233 | 0.3084957  | 1 |
| MONNIER_PC   | 313 | -0.429094  | -1.3409959 | 0.0989899  | 0.31367955 | 1 |
| REACTOME_T   | 182 | -0.4372748 | -1.337763  | 0.08498024 | 0.31538585 | 1 |
| MOOTHA_HL    | 415 | -0.599403  | -1.3370091 | 0.12790698 | 0.31459278 | 1 |
| BENPORATH_   | 335 | -0.4808596 | -1.3361936 | 0.13541667 | 0.31567696 | 1 |
| LI_AMPLIFIED | 162 | -0.497939  | -1.3355703 | 0.08349515 | 0.31614602 | 1 |
| TIEN_INTESTI | 50  | -0.3541307 | -1.3330935 | 0.03501094 | 0.32221985 | 1 |
| KEGG_PEROX   | 73  | -0.5022102 | -1.3266461 | 0.05232558 | 0.32956246 | 1 |
| LI_WILMS_TL  | 150 | -0.5061736 | -1.3250344 | 0.13513513 | 0.33154562 | 1 |
| REACTOME_S   | 50  | -0.6655102 | -1.3247126 | 0.27184466 | 0.33083895 | 1 |
| REACTOME_F   | 91  | -0.5142816 | -1.3243072 | 0.1879845  | 0.33052436 | 1 |
| YAO_TEMPOI   | 154 | -0.5884818 | -1.3235397 | 0.10658915 | 0.33110738 | 1 |
| CROMER_ME    | 57  | -0.5307072 | -1.3220961 | 0.07335907 | 0.33234188 | 1 |
| VECCHI_GAST  | 379 | -0.4739111 | -1.3217607 | 0.1553398  | 0.33188158 | 1 |
| KEGG_RNA_C   | 51  | -0.5229855 | -1.3190761 | 0.19921105 | 0.33809775 | 1 |
| KAUFFMANN    | 203 | -0.4612153 | -1.3190284 | 0.10742188 | 0.33707827 | 1 |
| SHEDDEN_LU   | 408 | -0.4931512 | -1.3189093 | 0.31034482 | 0.33605176 | 1 |

|              |     |            |            |            |            |   |
|--------------|-----|------------|------------|------------|------------|---|
| BENPORATH_   | 134 | -0.5290666 | -1.3141717 | 0.39087301 | 0.34169137 | 1 |
| ELVIDGE_HIF  | 59  | -0.5250878 | -1.3138316 | 0.12778905 | 0.34177384 | 1 |
| HAHTOLA_SE   | 92  | -0.4494093 | -1.3129678 | 0.10778443 | 0.34145525 | 1 |
| MISSIAGLIA_I | 96  | -0.520232  | -1.310602  | 0.2248996  | 0.3443926  | 1 |
| REACTOME_F   | 100 | -0.4828555 | -1.3069311 | 0.2034549  | 0.34674838 | 1 |
| REACTOME_M   | 114 | -0.5509951 | -1.3063464 | 0.15904573 | 0.34727055 | 1 |
| KEGG_PARKII  | 106 | -0.6605981 | -1.3055019 | 0.05273438 | 0.34848502 | 1 |
| KEGG_ARGIN   | 52  | -0.512484  | -1.3042612 | 0.13592233 | 0.35119972 | 1 |
| KAAB_FAILED  | 130 | -0.4307994 | -1.3033732 | 0.08349515 | 0.35301486 | 1 |
| REACTOME_M   | 143 | -0.5440286 | -1.3023854 | 0.29740518 | 0.35186106 | 1 |
| PAL_PRMT5_   | 167 | -0.4527556 | -1.3006499 | 0.28458497 | 0.35319325 | 1 |
| MOOTHA_MI    | 431 | -0.5904467 | -1.2985077 | 0.16860466 | 0.35358194 | 1 |
| COLDREN_GE   | 77  | -0.5182432 | -1.2960839 | 0.1553398  | 0.3559391  | 1 |
| KAAB_HEART   | 244 | -0.4525031 | -1.2905723 | 0.12427185 | 0.36658025 | 1 |
| SMID_BREAS   | 293 | -0.3545717 | -1.2877625 | 0.07755102 | 0.3712533  | 1 |
| FURUKAWA_    | 60  | -0.5113373 | -1.2874913 | 0.32388663 | 0.3706728  | 1 |
| STEIN_ESRRA  | 338 | -0.4784859 | -1.2777203 | 0.1553398  | 0.38833797 | 1 |
| SANA_TNF_S   | 68  | -0.4052816 | -1.2775831 | 0.06438632 | 0.3873477  | 1 |
| SAMOLS_TAR   | 53  | -0.3642736 | -1.2742635 | 0.03660886 | 0.392668   | 1 |
| KOBAYASHI_I  | 230 | -0.4983923 | -1.2738163 | 0.31034482 | 0.3923611  | 1 |
| SESTO_RESPC  | 99  | -0.4324351 | -1.2722359 | 0.15748031 | 0.39502725 | 1 |
| KONDO_PRO    | 76  | -0.368914  | -1.2721289 | 0.11660079 | 0.39418766 | 1 |
| MOOTHA_VC    | 83  | -0.7060596 | -1.2685155 | 0.07617188 | 0.39763057 | 1 |
| BLALOCK_AL   | 160 | -0.4089759 | -1.2671424 | 0.16064256 | 0.40020552 | 1 |
| BARIS_THYRC  | 53  | -0.3799824 | -1.2648767 | 0.0233463  | 0.4049065  | 1 |
| PUJANA_BRC   | 92  | -0.4956178 | -1.2643517 | 0.13513513 | 0.4055777  | 1 |
| ALONSO_ME    | 154 | -0.4539203 | -1.2628458 | 0.16730769 | 0.4066785  | 1 |
| WHITEFORD_   | 90  | -0.502296  | -1.2626287 | 0.21149898 | 0.4059182  | 1 |
| NOUZOVA_TI   | 110 | -0.4074654 | -1.2594832 | 0.08565737 | 0.40912405 | 1 |
| ELVIDGE_HYF  | 133 | -0.4810664 | -1.258399  | 0.16129032 | 0.40926328 | 1 |
| MARZEC_IL2_  | 105 | -0.4692576 | -1.2568729 | 0.15384616 | 0.41122514 | 1 |
| LIEN_BREAST  | 74  | -0.4057939 | -1.2540761 | 0.06521739 | 0.41417712 | 1 |
| REACTOME_E   | 62  | -0.721508  | -1.2526418 | 0.14257812 | 0.4134827  | 1 |
| MORI_EMU_I   | 85  | -0.4370332 | -1.2524612 | 0.12598425 | 0.41308045 | 1 |
| RAMALHO_ST   | 174 | -0.4599876 | -1.2522851 | 0.13211381 | 0.41212106 | 1 |
| KEGG_OXIDA   | 110 | -0.6365363 | -1.2520667 | 0.09320388 | 0.41153806 | 1 |
| REACTOME_/   | 123 | -0.4471209 | -1.2505245 | 0.34724858 | 0.41330475 | 1 |
| REACTOME_H   | 50  | -0.428389  | -1.2503687 | 0.15294118 | 0.41269854 | 1 |
| YAO_TEMPOI   | 144 | -0.6299365 | -1.2494569 | 0.17248061 | 0.41422084 | 1 |
| WINTER_HYP   | 84  | -0.501353  | -1.246003  | 0.18446602 | 0.4178674  | 1 |
| BENPORATH_   | 214 | -0.4456046 | -1.2442733 | 0.16730769 | 0.42150545 | 1 |

|              |     |            |            |            |            |   |
|--------------|-----|------------|------------|------------|------------|---|
| VANHARANT/   | 62  | -0.4351894 | -1.2437884 | 0.09879033 | 0.42164436 | 1 |
| MOOTHA_PG    | 326 | -0.5188286 | -1.2422372 | 0.14757282 | 0.42306152 | 1 |
| FUJII_YBX1_T | 130 | -0.4901755 | -1.2410928 | 0.32443532 | 0.42267728 | 1 |
| SENGUPTA_N   | 161 | -0.3240172 | -1.2395768 | 0.05957447 | 0.42405406 | 1 |
| BROWNE_INT   | 64  | -0.4548487 | -1.2356449 | 0.24361493 | 0.430211   | 1 |
| ALCALAY_AM   | 169 | -0.4283003 | -1.2346032 | 0.12427185 | 0.43104813 | 1 |
| YAO_TEMPOI   | 63  | -0.4704592 | -1.2330472 | 0.21579961 | 0.43248606 | 1 |
| KAUFFMANN    | 127 | -0.4393896 | -1.2282141 | 0.20542635 | 0.43802482 | 1 |
| REACTOME_I   | 353 | -0.4725681 | -1.2236784 | 0.1553398  | 0.4439209  | 1 |
| GAZDA_DIAM   | 54  | -0.4800229 | -1.2214751 | 0.2413793  | 0.44797376 | 1 |
| RUIZ_TNC_TA  | 132 | -0.4574575 | -1.2200356 | 0.316      | 0.45113102 | 1 |
| LASTOWSKA_   | 158 | -0.4594837 | -1.2197671 | 0.25527832 | 0.45090625 | 1 |
| KEGG_HEMA    | 83  | -0.4128289 | -1.2194581 | 0.10516252 | 0.45080572 | 1 |
| REACTOME_C   | 144 | -0.6027851 | -1.2188203 | 0.16893204 | 0.4512594  | 1 |
| REACTOME_S   | 56  | -0.58262   | -1.2150712 | 0.38178295 | 0.4606927  | 1 |
| SESTO_RESPC  | 70  | -0.4252488 | -1.2098674 | 0.19066937 | 0.47135812 | 1 |
| SHAFFER_IRF  | 63  | -0.4573358 | -1.2088468 | 0.21384929 | 0.4733499  | 1 |
| STEIN_ESRRA  | 467 | -0.4142055 | -1.2071981 | 0.1553398  | 0.47677138 | 1 |
| GRUETZMAN    | 316 | -0.380804  | -1.2046068 | 0.15968063 | 0.48112333 | 1 |
| STARK_PREFE  | 380 | -0.5161644 | -1.2015812 | 0.23938224 | 0.48709565 | 1 |
| KIM_MYCN_A   | 72  | -0.3809195 | -1.1999311 | 0.07572816 | 0.4904528  | 1 |
| SESTO_RESPC  | 68  | -0.5101607 | -1.1998107 | 0.21832359 | 0.48948923 | 1 |
| CREIGHTON_   | 256 | -0.3461021 | -1.1972799 | 0          | 0.4948843  | 1 |
| BYSTRYKH_HI  | 154 | -0.4025171 | -1.1967976 | 0.3707415  | 0.49513605 | 1 |
| TOYOTA_TAR   | 378 | -0.420269  | -1.1959964 | 0.22920893 | 0.4963395  | 1 |
| REACTOME_F   | 194 | -0.5467549 | -1.1909614 | 0.16893204 | 0.5059935  | 1 |
| PUJANA_BRE   | 96  | -0.4138039 | -1.1893785 | 0.24180327 | 0.5076247  | 1 |
| HOLLMAN_AI   | 244 | -0.3890375 | -1.1892165 | 0.05242718 | 0.50677335 | 1 |
| HINATA_NFKI  | 64  | -0.380841  | -1.1861471 | 0.19238476 | 0.5118058  | 1 |
| ZHANG_BREA   | 333 | -0.4365039 | -1.1855044 | 0.21010101 | 0.512256   | 1 |
| CREIGHTON_   | 447 | -0.3381601 | -1.1841289 | 0.10576923 | 0.5151913  | 1 |
| REACTOME_S   | 62  | -0.4627756 | -1.18321   | 0.31496063 | 0.51530546 | 1 |
| REACTOME_I   | 207 | -0.5420064 | -1.1797718 | 0.2        | 0.52072585 | 1 |
| MOHANKUM     | 351 | -0.3936176 | -1.178795  | 0.31349206 | 0.5221975  | 1 |
| PUJANA_BRE   | 50  | -0.4528785 | -1.1720262 | 0.23138833 | 0.53818524 | 1 |
| KEGG_HUNTI   | 164 | -0.503288  | -1.1702696 | 0.33009708 | 0.5389609  | 1 |
| JAATINEN_HE  | 276 | -0.342362  | -1.1682794 | 0.20286885 | 0.54190016 | 1 |
| LEE_EARLY_T  | 73  | -0.4165179 | -1.168069  | 0.18951613 | 0.54156435 | 1 |
| MARKEY_RB1   | 192 | -0.4364416 | -1.1674321 | 0.26358148 | 0.5420055  | 1 |
| BASAKI_YBX1  | 262 | -0.4585308 | -1.1661386 | 0.34541985 | 0.54391074 | 1 |
| CONCANNON    | 150 | -0.4036144 | -1.162848  | 0.20970874 | 0.54930824 | 1 |

|              |     |            |            |            |            |   |
|--------------|-----|------------|------------|------------|------------|---|
| HINATA_NFKI  | 69  | -0.3495684 | -1.1608984 | 0.17348927 | 0.5526149  | 1 |
| LEE_LIVER_C/ | 59  | -0.3862476 | -1.159062  | 0.10650887 | 0.55421835 | 1 |
| SEITZ_NEOPL  | 71  | -0.3509899 | -1.1569247 | 0.05907173 | 0.55691266 | 1 |
| ZHONG_RESP   | 58  | -0.4187189 | -1.1560605 | 0.15459883 | 0.55835396 | 1 |
| SHEPARD_CR   | 140 | -0.4597594 | -1.1559997 | 0.25675675 | 0.5572786  | 1 |
| REACTOME_F   | 107 | -0.3659113 | -1.1548    | 0.2326923  | 0.5584743  | 1 |
| UDAYAKUMA    | 118 | -0.4232274 | -1.1529273 | 0.3011811  | 0.56158614 | 1 |
| YEGNASUBRA   | 119 | -0.3300796 | -1.1507051 | 0.16293278 | 0.5665782  | 1 |
| WOOD_EBV_    | 102 | -0.4098697 | -1.1500839 | 0.18640776 | 0.5672332  | 1 |
| RASHI_RESPC  | 125 | -0.324042  | -1.1481168 | 0.07436399 | 0.57129115 | 1 |
| AMIT_SERUN   | 55  | -0.3537347 | -1.1479938 | 0.16763006 | 0.5703853  | 1 |
| TONKS_TARG   | 51  | -0.3927748 | -1.1476088 | 0.22586873 | 0.5677961  | 1 |
| RIZ_ERYTHRC  | 71  | -0.3485245 | -1.147597  | 0.19959266 | 0.56662995 | 1 |
| KEGG_ALZHE   | 149 | -0.4760751 | -1.1469146 | 0.40697673 | 0.5674311  | 1 |
| CHEMNITZ_R   | 121 | -0.4119982 | -1.146371  | 0.394      | 0.56803983 | 1 |
| LINDSTEDT_C  | 56  | -0.3360081 | -1.1435229 | 0.12273642 | 0.5718636  | 1 |
| FERREIRA_EV  | 129 | -0.4348196 | -1.1428102 | 0.27565393 | 0.5730901  | 1 |
| REACTOME_C   | 277 | -0.4455677 | -1.14243   | 0.39321357 | 0.57178473 | 1 |
| SMITH_TERT_  | 121 | -0.4112362 | -1.1416941 | 0.3840156  | 0.5724808  | 1 |
| TAKAO_RESP   | 70  | -0.4883811 | -1.1409997 | 0.31791908 | 0.57319564 | 1 |
| KEGG_CYTOS   | 51  | -0.4220471 | -1.1405275 | 0.28654972 | 0.57353455 | 1 |
| RIZKI_TUMOF  | 55  | -0.368187  | -1.1388958 | 0.33595285 | 0.57574296 | 1 |
| SANA_RESPO   | 57  | -0.4173769 | -1.1383814 | 0.21568628 | 0.57566935 | 1 |
| WEST_ADREN   | 275 | -0.4099651 | -1.13777   | 0.3722334  | 0.57627547 | 1 |
| DAIRKEE_TER  | 299 | -0.4885585 | -1.1320616 | 0.3697318  | 0.589414   | 1 |
| ROME_INSUL   | 86  | -0.4481734 | -1.1316464 | 0.3759542  | 0.5895083  | 1 |
| IZADPANAH_   | 114 | -0.3593126 | -1.1302102 | 0.24856597 | 0.59077054 | 1 |
| TOOKER_RES   | 111 | -0.3844552 | -1.1254687 | 0.2019802  | 0.59861106 | 1 |
| TOOKER_GEN   | 111 | -0.3844552 | -1.1254687 | 0.2019802  | 0.5998106  | 1 |
| KEGG_ARACH   | 51  | -0.4519492 | -1.1251076 | 0.23800384 | 0.5982173  | 1 |
| VANTVEER_B   | 207 | -0.3635569 | -1.1247321 | 0.31034482 | 0.59834594 | 1 |
| JAZAG_TGFB   | 99  | -0.371744  | -1.123764  | 0.22044088 | 0.5988704  | 1 |
| SESTO_RESPC  | 64  | -0.3829368 | -1.121021  | 0.27724665 | 0.60244274 | 1 |
| LIU_SOX4_TA  | 275 | -0.3817637 | -1.1196979 | 0.32815534 | 0.60513455 | 1 |
| FERNANDEZ_   | 175 | -0.3625211 | -1.1196048 | 0.2620424  | 0.6042379  | 1 |
| HUANG_DAS    | 58  | -0.3810321 | -1.1151493 | 0.15686275 | 0.6107992  | 1 |
| ROSTY_CERVI  | 127 | -0.4558013 | -1.1148914 | 0.36127743 | 0.61021346 | 1 |
| DER_IFN_ALP  | 56  | -0.3863511 | -1.1145473 | 0.21917808 | 0.60882735 | 1 |
| LEE_LIVER_C/ | 51  | -0.4195087 | -1.1145402 | 0.332696   | 0.6077005  | 1 |
| LEE_RECENT_  | 98  | -0.3462753 | -1.1138343 | 0.2081712  | 0.60856587 | 1 |
| HSIAO_HOUS   | 364 | -0.3855977 | -1.113719  | 0.29672447 | 0.6076923  | 1 |

|             |     |            |            |            |            |   |
|-------------|-----|------------|------------|------------|------------|---|
| LIU_NASOPH  | 59  | -0.385915  | -1.1090871 | 0.23339659 | 0.6143487  | 1 |
| PUJANA_BRC  | 388 | -0.3429618 | -1.1081359 | 0.1609658  | 0.61501926 | 1 |
| DER_IFN_GAI | 56  | -0.410899  | -1.1071697 | 0.21832359 | 0.6154242  | 1 |
| MCBRYAN_PI  | 161 | -0.3608815 | -1.1048793 | 0.20231214 | 0.61702573 | 1 |
| YAO_TEMPOI  | 71  | -0.4195082 | -1.1019137 | 0.36100388 | 0.6204504  | 1 |
| MATSUDA_N   | 397 | -0.3274542 | -1.099308  | 0.28375733 | 0.62375546 | 1 |
| MAHAJAN_RI  | 59  | -0.312027  | -1.0963986 | 0.26530612 | 0.62705797 | 1 |
| REACTOME_T  | 211 | -0.3133526 | -1.0919464 | 0.19959678 | 0.63400507 | 1 |
| BOYLAN_MU   | 98  | -0.3661209 | -1.0915235 | 0.37704918 | 0.6341056  | 1 |
| HELLER_HDA  | 247 | -0.3364086 | -1.0872804 | 0.36237624 | 0.64402777 | 1 |
| KEGG_CELL_C | 119 | -0.3864707 | -1.0833633 | 0.39243028 | 0.6500959  | 1 |
| PUJANA_XPR  | 155 | -0.3811128 | -1.0803035 | 0.402863   | 0.6544248  | 1 |
| PROVENZANI  | 178 | -0.3119761 | -1.0803003 | 0.21471173 | 0.653285   | 1 |
| WANG_CLIM   | 150 | -0.3438613 | -1.0796276 | 0.29961088 | 0.6526676  | 1 |
| PUIFFE_INVA | 74  | -0.3808572 | -1.0776199 | 0.32427186 | 0.65554255 | 1 |
| REACTOME_C  | 55  | -0.4785849 | -1.0760766 | 0.42773438 | 0.65670586 | 1 |
| WEI_MIR34A  | 131 | -0.3102503 | -1.0751    | 0.2804878  | 0.6574501  | 1 |
| ELVIDGE_HYF | 54  | -0.4082237 | -1.0733055 | 0.31650487 | 0.66156006 | 1 |
| KAYO_AGING  | 99  | -0.4159857 | -1.0712173 | 0.38728324 | 0.66308665 | 1 |
| MARTINEZ_R  | 439 | -0.2930113 | -1.0692912 | 0.2485323  | 0.6636939  | 1 |
| BOYLAN_MU   | 73  | -0.3240312 | -1.0690569 | 0.3225191  | 0.6632726  | 1 |
| HAHTOLA_M   | 102 | -0.3253757 | -1.0620123 | 0.24248497 | 0.679664   | 1 |
| BLUM_RESPC  | 317 | -0.3702589 | -1.0618302 | 0.41338584 | 0.678901   | 1 |
| HORIUCHI_W  | 273 | -0.3679996 | -1.0601991 | 0.3722334  | 0.6810416  | 1 |
| ONDER_CDH   | 152 | -0.3758776 | -1.0579518 | 0.37860084 | 0.6826063  | 1 |
| DER_IFN_BET | 78  | -0.3955305 | -1.0569249 | 0.32793522 | 0.68315494 | 1 |
| GAURNIER_P  | 53  | -0.3544779 | -1.0552689 | 0.31238094 | 0.6842891  | 1 |
| CERVERA_SDI | 106 | -0.3301604 | -1.0539551 | 0.46783626 | 0.6854173  | 1 |
| KEGG_ANTIG  | 81  | -0.3737024 | -1.0506358 | 0.36022514 | 0.68862295 | 1 |
| LIN_NPAS4_T | 57  | -0.3248476 | -1.0476446 | 0.3031496  | 0.692432   | 1 |
| MARTORIATI  | 85  | -0.3633533 | -1.0470937 | 0.39453125 | 0.6930303  | 1 |
| ZHU_CMV_2   | 53  | -0.3680171 | -1.0436509 | 0.39175257 | 0.6998216  | 1 |
| FONTAINE_FC | 60  | -0.34014   | -1.0398704 | 0.37721023 | 0.70901966 | 1 |
| SMID_BREAS  | 153 | -0.2915503 | -1.0390773 | 0.3920792  | 0.7102946  | 1 |
| DITTMER_PTI | 69  | -0.3371848 | -1.0388869 | 0.3669903  | 0.7097871  | 1 |
| JIANG_HYPO  | 53  | -0.4008202 | -1.0385572 | 0.3625954  | 0.70952487 | 1 |
| OUILLETTE_C | 67  | -0.3665491 | -1.0383172 | 0.45364892 | 0.70804656 | 1 |
| HOEBEKE_LYI | 81  | -0.352762  | -1.0382442 | 0.36711282 | 0.7070532  | 1 |
| MORI_SMALL  | 57  | -0.3693739 | -1.0329837 | 0.39321357 | 0.7204028  | 1 |
| KEGG_CARDI  | 70  | -0.4133113 | -1.032743  | 0.52115387 | 0.7199432  | 1 |
| FARMER_BRE  | 298 | -0.2924777 | -1.0325378 | 0.47420636 | 0.71936417 | 1 |

|              |     |            |            |            |            |   |
|--------------|-----|------------|------------|------------|------------|---|
| TAKAO_RESP   | 82  | -0.3504328 | -1.0322977 | 0.41814595 | 0.7188021  | 1 |
| HOSHIDA_LIV  | 68  | -0.283112  | -1.0304874 | 0.3192389  | 0.7228517  | 1 |
| CHESLER_BR   | 60  | -0.3324119 | -1.0293567 | 0.36272544 | 0.72464067 | 1 |
| GRUETZMAN    | 183 | -0.3056466 | -1.0288798 | 0.41666666 | 0.7247442  | 1 |
| ALCALA_APO   | 82  | -0.3502962 | -1.0285752 | 0.41060904 | 0.72462773 | 1 |
| ICHIBA_GRAF  | 88  | -0.396823  | -1.0273074 | 0.40458015 | 0.7268128  | 1 |
| YAO_TEMPOI   | 70  | -0.3870886 | -1.024348  | 0.43822393 | 0.72882193 | 1 |
| LINDSTEDT_C  | 53  | -0.363831  | -1.0241903 | 0.40726578 | 0.72822094 | 1 |
| TOOKER_RES   | 75  | -0.404373  | -1.0221282 | 0.5028791  | 0.730367   | 1 |
| TOOKER_GEN   | 75  | -0.404373  | -1.0221282 | 0.5028791  | 0.73151904 | 1 |
| YAGI_AML_SI  | 113 | -0.2986885 | -1.0208124 | 0.42447418 | 0.73204887 | 1 |
| LOCKWOOD_    | 157 | -0.3816338 | -1.0200093 | 0.42857143 | 0.7328862  | 1 |
| AMIT_EGF_RI  | 56  | -0.2952578 | -1.0182083 | 0.4488978  | 0.7330778  | 1 |
| LEE_LIVER_C  | 60  | -0.3444166 | -1.0166882 | 0.3816047  | 0.73339623 | 1 |
| TAKEDA_TAR   | 159 | -0.3135388 | -1.0161191 | 0.49126214 | 0.7325618  | 1 |
| POOLA_INVA   | 260 | -0.2936435 | -1.0146232 | 0.48554912 | 0.7347855  | 1 |
| XU_GH1_AUT   | 157 | -0.3230025 | -1.013039  | 0.5106796  | 0.7363847  | 1 |
| ACEVEDO_NC   | 315 | -0.3915371 | -1.0127143 | 0.52030945 | 0.73595923 | 1 |
| MARTINEZ_R   | 493 | -0.2651711 | -1.0087678 | 0.46271512 | 0.742056   | 1 |
| MARTINEZ_TI  | 494 | -0.2734388 | -1.0086303 | 0.45142856 | 0.74138844 | 1 |
| LINDGREN_BI  | 106 | -0.3187355 | -1.0079539 | 0.500998   | 0.74188304 | 1 |
| SCHLOSSER_S  | 97  | -0.4050652 | -1.0076109 | 0.45559844 | 0.74174523 | 1 |
| WOO_LIVER_   | 76  | -0.371278  | -1.0068648 | 0.46564886 | 0.74284893 | 1 |
| MAYBURD_RI   | 51  | -0.4046713 | -1.0061988 | 0.34808853 | 0.7424954  | 1 |
| WANG_CISPL   | 126 | -0.3419569 | -1.0054569 | 0.47440946 | 0.7433551  | 1 |
| RAMASWAM     | 53  | -0.3384594 | -1.0046715 | 0.42074364 | 0.74290764 | 1 |
| LEE_LIVER_C  | 59  | -0.3676456 | -1.0024371 | 0.4815534  | 0.74717134 | 1 |
| SENESE_HDA   | 110 | -0.2978038 | -1.0023861 | 0.41617358 | 0.7461379  | 1 |
| RIZKI_TUMOF  | 62  | -0.3718867 | -1.001459  | 0.5152672  | 0.7456128  | 1 |
| PELLICCIOTTA | 59  | -0.4151308 | -1.001345  | 0.4431599  | 0.7449962  | 1 |
| RIZKI_TUMOF  | 179 | -0.3098745 | -1.0001413 | 0.5037879  | 0.7474916  | 1 |
| RIGGINS_TAN  | 63  | -0.3260548 | -0.9946014 | 0.5009346  | 0.7548613  | 1 |
| SWEET_LUNC   | 410 | -0.3385793 | -0.9944515 | 0.41346154 | 0.7541448  | 1 |
| ENK_UV_RES   | 274 | -0.3627843 | -0.9904503 | 0.54385966 | 0.7562291  | 1 |
| RIZKI_TUMOF  | 214 | -0.3124524 | -0.9840325 | 0.52998066 | 0.76868266 | 1 |
| REACTOME_M   | 79  | -0.4101688 | -0.9837903 | 0.36619717 | 0.7679933  | 1 |
| MITSIADES_R  | 219 | -0.3760661 | -0.9833235 | 0.45564517 | 0.76798356 | 1 |
| JAZAG_TGFB   | 95  | -0.345918  | -0.9827587 | 0.47206166 | 0.7681966  | 1 |
| YAMASHITA_   | 54  | -0.3552377 | -0.9809061 | 0.4848485  | 0.7708841  | 1 |
| SMID_BREAS   | 75  | -0.3108173 | -0.9804359 | 0.60365856 | 0.76984483 | 1 |
| SHAFFER_IRF  | 95  | -0.3360494 | -0.9791313 | 0.48118812 | 0.7709234  | 1 |



|              |     |            |            |            |            |   |
|--------------|-----|------------|------------|------------|------------|---|
| ROSS_AML_C   | 67  | -0.3438277 | -0.9783158 | 0.53949904 | 0.7706256  | 1 |
| IVANOVA_HE   | 120 | -0.3528948 | -0.9777002 | 0.5396518  | 0.7716081  | 1 |
| DEURIG_T_CI  | 337 | -0.3277135 | -0.9772406 | 0.61950284 | 0.7716744  | 1 |
| KIM_WT1_TA   | 120 | -0.3043606 | -0.9771964 | 0.50784314 | 0.7707165  | 1 |
| RODWELL_AC   | 117 | -0.3221055 | -0.9762177 | 0.52112675 | 0.7711596  | 1 |
| ENK_UV_RES   | 446 | -0.3285475 | -0.9714161 | 0.4657258  | 0.7765956  | 1 |
| SCHUETZ_BRI  | 326 | -0.2587204 | -0.9705526 | 0.58300394 | 0.7780966  | 1 |
| KEGG_UBIQU   | 122 | -0.3073748 | -0.9702977 | 0.5666004  | 0.7766397  | 1 |
| WANG_LMO4    | 291 | -0.3060895 | -0.9702168 | 0.48594376 | 0.775835   | 1 |
| HOSHIDA_LIV  | 223 | -0.3095534 | -0.9676534 | 0.6052104  | 0.77858484 | 1 |
| ODONNELL_T   | 117 | -0.3899526 | -0.9654841 | 0.5070994  | 0.78252065 | 1 |
| SAKAI_CHROI  | 75  | -0.3417657 | -0.9618278 | 0.46137786 | 0.78427714 | 1 |
| KEGG_VIBRIC  | 50  | -0.369909  | -0.9617921 | 0.44781783 | 0.78329176 | 1 |
| SLEBOS_HEAI  | 67  | -0.3728686 | -0.9605607 | 0.4466403  | 0.78560245 | 1 |
| TARTE_PLASM  | 74  | -0.3805366 | -0.959293  | 0.4949495  | 0.78693193 | 1 |
| DOANE_BREA   | 65  | -0.3233479 | -0.9560806 | 0.6403846  | 0.7935546  | 1 |
| CAIRO_HEPA   | 250 | -0.2934293 | -0.9548129 | 0.525      | 0.79604614 | 1 |
| JIANG_VHL_T  | 80  | -0.3570948 | -0.9545515 | 0.6539197  | 0.794529   | 1 |
| KAYO_CALOR   | 61  | -0.3557881 | -0.9539402 | 0.46462715 | 0.7934869  | 1 |
| WAMUNYOKI    | 121 | -0.3406864 | -0.9530064 | 0.6043307  | 0.7940593  | 1 |
| ROZANOV_M    | 237 | -0.2619145 | -0.9517499 | 0.592803   | 0.79401904 | 1 |
| DAVICIONI_M  | 160 | -0.3127678 | -0.9508251 | 0.4980695  | 0.7956671  | 1 |
| RICKMAN_TU   | 101 | -0.3380928 | -0.9446272 | 0.56130266 | 0.8074123  | 1 |
| DOANE_BREA   | 106 | -0.2531155 | -0.9439417 | 0.60940695 | 0.8071192  | 1 |
| RICKMAN_MI   | 283 | -0.2870836 | -0.9433311 | 0.6        | 0.8074987  | 1 |
| HOSHIDA_LIV  | 105 | -0.3448028 | -0.942555  | 0.6851145  | 0.80831254 | 1 |
| AGUIRRE_PA   | 209 | -0.3073517 | -0.936431  | 0.59655833 | 0.8186116  | 1 |
| FONTAINE_FC  | 63  | -0.3137474 | -0.9361925 | 0.6103896  | 0.81810945 | 1 |
| AMUNDSON_    | 147 | -0.278187  | -0.9356629 | 0.75936884 | 0.81601423 | 1 |
| ONKEN_UVEA   | 481 | -0.2429971 | -0.9343532 | 0.76363635 | 0.81808656 | 1 |
| VECCHI_GAST  | 120 | -0.3656235 | -0.9338912 | 0.48183557 | 0.81800383 | 1 |
| ASTIER_INTEC | 53  | -0.2924691 | -0.9276373 | 0.6990476  | 0.8261596  | 1 |
| DOANE_RESP   | 166 | -0.2970314 | -0.9266563 | 0.60190475 | 0.82785386 | 1 |
| WIELAND_UP   | 95  | -0.3338194 | -0.9236935 | 0.67241377 | 0.83217925 | 1 |
| HOLLMAN_AI   | 183 | -0.3001521 | -0.9225384 | 0.5518591  | 0.8336994  | 1 |
| BRUECKNER_   | 68  | -0.2814288 | -0.9206731 | 0.6904277  | 0.8341345  | 1 |
| BILBAN_B_CL  | 59  | -0.2940368 | -0.9206262 | 0.57258064 | 0.8331968  | 1 |
| CAIRO_LIVER  | 203 | -0.2669882 | -0.9196979 | 0.67172676 | 0.8332192  | 1 |
| SHEPARD_BM   | 142 | -0.2828862 | -0.9188023 | 0.69902915 | 0.8324424  | 1 |
| HELLER_HDAI  | 243 | -0.2811207 | -0.9169477 | 0.711501   | 0.8317271  | 1 |
| CHIANG_LIVE  | 151 | -0.2974355 | -0.9155186 | 0.51937985 | 0.83438736 | 1 |

|             |     |            |            |            |            |   |
|-------------|-----|------------|------------|------------|------------|---|
| FLECHNER_BI | 499 | -0.298811  | -0.9151684 | 0.5550935  | 0.83405244 | 1 |
| HOSHIDA_LIV | 257 | -0.3078447 | -0.9147793 | 0.7251908  | 0.83388007 | 1 |
| BHATI_G2M_  | 112 | -0.3250134 | -0.911683  | 0.6603053  | 0.83581674 | 1 |
| REACTOME_F  | 153 | -0.2436305 | -0.9081653 | 0.5923077  | 0.8396795  | 1 |
| KUMAR_TAR   | 338 | -0.2579385 | -0.9071497 | 0.7343454  | 0.84094113 | 1 |
| SCHUETZ_BRI | 80  | -0.2747019 | -0.9054932 | 0.6284501  | 0.8407914  | 1 |
| MARTINEZ_R  | 218 | -0.3449727 | -0.9013303 | 0.6099585  | 0.84678864 | 1 |
| CAIRO_HEPA  | 188 | -0.2864524 | -0.9000708 | 0.666      | 0.8484675  | 1 |
| SU_LIVER    | 54  | -0.2990434 | -0.8992533 | 0.6673152  | 0.84770817 | 1 |
| GOLDRATH_A  | 292 | -0.305927  | -0.8979427 | 0.49902153 | 0.8497494  | 1 |
| SEIDEN_ONC  | 79  | -0.3548252 | -0.8976307 | 0.6020833  | 0.84859896 | 1 |
| NIKOLSKY_BR | 108 | -0.3276146 | -0.897614  | 0.6111111  | 0.8475847  | 1 |
| LINDGREN_BI | 289 | -0.3314688 | -0.8961681 | 0.5476673  | 0.84911627 | 1 |
| REACTOME_C  | 78  | -0.375043  | -0.8952501 | 0.5412262  | 0.8503485  | 1 |
| BROWNE_HC   | 171 | -0.274107  | -0.8922122 | 0.7737374  | 0.85450435 | 1 |
| KANG_DOXO   | 50  | -0.3639341 | -0.8873357 | 0.6848485  | 0.8614031  | 1 |
| BIDUS_META  | 175 | -0.3773604 | -0.8858271 | 0.6458753  | 0.8596656  | 1 |
| AGUIRRE_PAI | 262 | -0.3270772 | -0.8851425 | 0.7594697  | 0.8601408  | 1 |
| ZHU_CMV_AI  | 71  | -0.2822881 | -0.8839456 | 0.65756303 | 0.86074567 | 1 |
| HOFFMANN_   | 84  | -0.3614145 | -0.8829031 | 0.69818914 | 0.86189646 | 1 |
| FARMER_BRE  | 303 | -0.2697084 | -0.8814256 | 0.75303644 | 0.8632857  | 1 |
| BHATI_G2M_  | 102 | -0.280622  | -0.8786677 | 0.72904485 | 0.86730015 | 1 |
| KOYAMA_SEM  | 198 | -0.26486   | -0.876282  | 0.8590476  | 0.8684702  | 1 |
| KONDO_PRO   | 145 | -0.2754374 | -0.8753896 | 0.62815124 | 0.8687326  | 1 |
| NATSUME_RE  | 65  | -0.2841014 | -0.8735826 | 0.75403225 | 0.8707923  | 1 |
| ROSS_AML_V  | 72  | -0.2956686 | -0.8727115 | 0.6959847  | 0.8709751  | 1 |
| LINDGREN_BI | 337 | -0.2924564 | -0.8692275 | 0.61969113 | 0.8738992  | 1 |
| ZHOU_INFLAI | 330 | -0.2928656 | -0.866739  | 0.740458   | 0.8741089  | 1 |
| ZHOU_INFLAI | 330 | -0.2928656 | -0.866739  | 0.740458   | 0.8751194  | 1 |
| IWANAGA_C/  | 136 | -0.2806022 | -0.8666261 | 0.80730224 | 0.87337893 | 1 |
| MULLIGHAN_  | 66  | -0.3344865 | -0.8643585 | 0.65725046 | 0.87558186 | 1 |
| SPIELMAN_LY | 441 | -0.3247343 | -0.8628827 | 0.63584906 | 0.87777865 | 1 |
| MARKEY_RB1  | 188 | -0.2904491 | -0.8620555 | 0.8854962  | 0.87846506 | 1 |
| DITTMER_PTI | 106 | -0.3434042 | -0.8612489 | 0.6961538  | 0.87900627 | 1 |
| MARKEY_RB1  | 105 | -0.2967989 | -0.8600718 | 0.7010101  | 0.87982064 | 1 |
| RODWELL_AC  | 108 | -0.2637229 | -0.857745  | 0.7234469  | 0.8842135  | 1 |
| RUTELLA_RES | 383 | -0.2605397 | -0.8571928 | 0.77115387 | 0.8845832  | 1 |
| SENGUPTA_M  | 343 | -0.2907109 | -0.8569896 | 0.5932914  | 0.88397676 | 1 |
| STEIN_ESR1_ | 78  | -0.3186398 | -0.8562509 | 0.61676645 | 0.88259596 | 1 |
| LIU_PROSTAT | 82  | -0.2957766 | -0.855306  | 0.6796116  | 0.88348216 | 1 |
| REACTOME_F  | 81  | -0.3089139 | -0.8543689 | 0.672      | 0.88473487 | 1 |

|              |     |            |            |            |            |   |
|--------------|-----|------------|------------|------------|------------|---|
| MILI_PSEUDC  | 405 | -0.3346343 | -0.8538587 | 0.6380753  | 0.88475466 | 1 |
| BROWNE_HC    | 143 | -0.2548392 | -0.8529682 | 0.82751936 | 0.8856205  | 1 |
| KEGG_PPAR_   | 66  | -0.3221043 | -0.8506193 | 0.7476099  | 0.88775945 | 1 |
| LEE_LIVER_C/ | 71  | -0.3077478 | -0.8480868 | 0.76620823 | 0.89154917 | 1 |
| BONOME_OV    | 221 | -0.2540836 | -0.8459849 | 0.8778626  | 0.89208215 | 1 |
| UEDA_PERIFE  | 128 | -0.267193  | -0.8438611 | 0.7534517  | 0.8943381  | 1 |
| OUILLETTE_C  | 56  | -0.3116391 | -0.8423911 | 0.7561905  | 0.896265   | 1 |
| LU_AGING_B   | 144 | -0.2551121 | -0.8414801 | 0.740519   | 0.8951121  | 1 |
| CHIANG_LIVE  | 136 | -0.2922877 | -0.8396241 | 0.6472946  | 0.89716476 | 1 |
| LIU_VAV3_PF  | 84  | -0.2807069 | -0.8386084 | 0.801636   | 0.8979248  | 1 |
| BANDRES_RE   | 136 | -0.3041973 | -0.8375271 | 0.6780952  | 0.8965441  | 1 |
| LANDIS_ERBE  | 130 | -0.2651681 | -0.8342724 | 0.8181818  | 0.8980462  | 1 |
| LIEN_BREAST  | 96  | -0.2477619 | -0.8337745 | 0.7552182  | 0.8973147  | 1 |
| CHUNG_BLIS   | 115 | -0.3758003 | -0.8324079 | 0.8244275  | 0.89688206 | 1 |
| BENPORATH_   | 260 | -0.2603228 | -0.8315069 | 0.8145161  | 0.896825   | 1 |
| DACOSTA_UV   | 286 | -0.3322809 | -0.8283957 | 0.665392   | 0.89761573 | 1 |
| PUIFFE_INVA  | 127 | -0.2464297 | -0.825785  | 0.8762089  | 0.901547   | 1 |
| ROSS_ACUTE   | 75  | -0.2732314 | -0.8257077 | 0.83778626 | 0.9007997  | 1 |
| SENESE_HDA   | 445 | -0.2427111 | -0.8228235 | 0.9292543  | 0.90413415 | 1 |
| MARTINEZ_R   | 60  | -0.3154635 | -0.8223677 | 0.66795367 | 0.90321195 | 1 |
| BYSTRYKH_HI  | 106 | -0.273853  | -0.8219459 | 0.7981132  | 0.902039   | 1 |
| SETLUR_PROS  | 62  | -0.2599259 | -0.8150966 | 0.90548205 | 0.9087158  | 1 |
| WATANABE_I   | 86  | -0.2901737 | -0.8126655 | 0.86612576 | 0.9127322  | 1 |
| NGUYEN_NO    | 61  | -0.2886415 | -0.8119819 | 0.8217054  | 0.9130655  | 1 |
| WALLACE_PR   | 265 | -0.2653019 | -0.8096488 | 0.73457944 | 0.91461027 | 1 |
| WINTER_HYP   | 211 | -0.2794309 | -0.8094928 | 0.72848946 | 0.91390306 | 1 |
| RUTELLA_RES  | 366 | -0.2448901 | -0.8073219 | 0.93032014 | 0.91431534 | 1 |
| KEGG_OOCYT   | 106 | -0.2822633 | -0.806928  | 0.7559055  | 0.9140155  | 1 |
| KIM_WT1_TA   | 416 | -0.2605581 | -0.806675  | 0.82270914 | 0.9134137  | 1 |
| LE_EGR2_TAF  | 92  | -0.2714395 | -0.8065515 | 0.7983871  | 0.9128009  | 1 |
| GRABARCZYK   | 63  | -0.2964406 | -0.8062483 | 0.8023952  | 0.91247815 | 1 |
| BROWNE_HC    | 207 | -0.2601065 | -0.8058392 | 0.82835823 | 0.91226524 | 1 |
| SMID_BREAS   | 128 | -0.2616979 | -0.8055444 | 0.84250474 | 0.91001904 | 1 |
| LEE_LIVER_C/ | 61  | -0.3057366 | -0.8013715 | 0.7457306  | 0.9106787  | 1 |
| TSENG_IRS1_  | 111 | -0.2297818 | -0.7970244 | 0.97137403 | 0.91685843 | 1 |
| FLECHNER_PI  | 145 | -0.2725078 | -0.7934017 | 0.8298279  | 0.9205074  | 1 |
| ROVERSI_GLI  | 81  | -0.2962192 | -0.7911503 | 0.6977186  | 0.9222958  | 1 |
| HADDAD_T_L   | 59  | -0.2767328 | -0.7899646 | 0.8904959  | 0.9223327  | 1 |
| NING_CHROM   | 57  | -0.2870721 | -0.7894023 | 0.780303   | 0.92237896 | 1 |
| SU_TESTIS    | 75  | -0.3094584 | -0.7888103 | 0.79116464 | 0.9223165  | 1 |
| COLDREN_GE   | 198 | -0.2041221 | -0.7841621 | 0.9442231  | 0.9280222  | 1 |

|              |     |            |            |            |            |   |
|--------------|-----|------------|------------|------------|------------|---|
| CHAUHAN_RI   | 91  | -0.2599164 | -0.7798342 | 0.84644914 | 0.92807543 | 1 |
| MULLIGHAN_   | 147 | -0.2710086 | -0.7790073 | 0.83870965 | 0.9270181  | 1 |
| GAL_LEUKEM   | 228 | -0.2423286 | -0.77823   | 0.84190476 | 0.92741996 | 1 |
| ENK_UV_RES   | 500 | -0.2892262 | -0.7773304 | 0.74857146 | 0.92778677 | 1 |
| HOSHIDA_LIV  | 110 | -0.2496625 | -0.7765051 | 0.85979384 | 0.9272498  | 1 |
| FURUKAWA_    | 61  | -0.2710258 | -0.7746694 | 0.79962546 | 0.92918026 | 1 |
| SENGUPTA_N   | 247 | -0.2941559 | -0.7740096 | 0.7095436  | 0.929273   | 1 |
| MULLIGHAN_   | 111 | -0.2921068 | -0.7712747 | 0.82649255 | 0.9308273  | 1 |
| WILCOX_PRE!  | 138 | -0.2917172 | -0.7708877 | 0.8832998  | 0.93050575 | 1 |
| BROWNE_HC    | 273 | -0.2303934 | -0.7685891 | 0.88385826 | 0.9302829  | 1 |
| FARMER_BRE   | 308 | -0.2524852 | -0.7677495 | 0.87525153 | 0.9306177  | 1 |
| DAZARD_RES   | 76  | -0.2916238 | -0.7673611 | 0.8792757  | 0.9303122  | 1 |
| TURASHVILI_  | 55  | -0.2700284 | -0.7646492 | 0.85287845 | 0.9337436  | 1 |
| HOOI_ST7_TA  | 77  | -0.2966016 | -0.7599952 | 0.8485477  | 0.93533754 | 1 |
| REACTOME_M   | 212 | -0.255204  | -0.7577043 | 0.905303   | 0.9370708  | 1 |
| SMITH_TERT_  | 65  | -0.3152388 | -0.7568986 | 0.9351145  | 0.93742955 | 1 |
| BROWNE_HC    | 208 | -0.2413174 | -0.753243  | 0.9694501  | 0.93907964 | 1 |
| LANDIS_BREA  | 61  | -0.225582  | -0.7483723 | 0.94219655 | 0.94185543 | 1 |
| LEE_LIVER_C/ | 53  | -0.27608   | -0.7481397 | 0.94015443 | 0.9412167  | 1 |
| TURASHVILI_  | 60  | -0.2797666 | -0.747795  | 0.9526749  | 0.94080156 | 1 |
| BONCI_TARG   | 80  | -0.2558667 | -0.7457694 | 0.8961303  | 0.9396484  | 1 |
| BROWNE_HC    | 79  | -0.239701  | -0.7434099 | 0.9580838  | 0.9401598  | 1 |
| DING_LUNG_   | 93  | -0.2828725 | -0.737722  | 0.828866   | 0.9432354  | 1 |
| NING_CHROM   | 68  | -0.3128604 | -0.7370656 | 0.7169811  | 0.94307405 | 1 |
| GINESTIER_BI | 61  | -0.2859843 | -0.7299922 | 0.802521   | 0.94889814 | 1 |
| VANTVEER_B   | 98  | -0.2729015 | -0.726835  | 0.89134806 | 0.947888   | 1 |
| SCIBETTA_KD  | 70  | -0.270724  | -0.7265728 | 0.7729084  | 0.9473695  | 1 |
| KEGG_TIGHT_  | 125 | -0.2121862 | -0.7258444 | 0.9701789  | 0.9475045  | 1 |
| NIKOLSKY_BR  | 101 | -0.2260089 | -0.7255135 | 0.91791046 | 0.94701326 | 1 |
| AMUNDSON_    | 84  | -0.2783401 | -0.7250298 | 0.97137403 | 0.94589376 | 1 |
| NAKAYAMA_!   | 77  | -0.2128104 | -0.7238988 | 0.890595   | 0.9462871  | 1 |
| KOKKINAKIS_  | 128 | -0.2422213 | -0.7196002 | 0.7274472  | 0.94749206 | 1 |
| CHIARADONN   | 134 | -0.2726491 | -0.7178737 | 0.9717514  | 0.94687814 | 1 |
| HSIAO_LIVER  | 232 | -0.2261119 | -0.7161241 | 0.9337121  | 0.9464838  | 1 |
| MUNSHI_MU    | 55  | -0.2878308 | -0.7100655 | 0.857685   | 0.94741523 | 1 |
| PROVENZANI   | 130 | -0.2597885 | -0.7020589 | 0.9082218  | 0.955176   | 1 |
| KIM_GASTRIC  | 92  | -0.2837916 | -0.6987378 | 0.79664177 | 0.9578551  | 1 |
| ACEVEDO_LIV  | 482 | -0.2445096 | -0.6968145 | 0.91729325 | 0.957867   | 1 |
| MILI_PSEUDC  | 54  | -0.2594633 | -0.6917952 | 0.90631366 | 0.95866984 | 1 |
| DELYS_THYRC  | 392 | -0.2129058 | -0.6910699 | 0.9714286  | 0.9585902  | 1 |
| NIKOLSKY_BR  | 133 | -0.2735274 | -0.6794151 | 0.8383459  | 0.9647341  | 1 |

|              |     |            |            |            |            |   |
|--------------|-----|------------|------------|------------|------------|---|
| RADMACHER    | 69  | -0.2398906 | -0.6726118 | 0.9265873  | 0.9691358  | 1 |
| DASU_IL6_SIK | 56  | -0.2615259 | -0.6698028 | 0.89341086 | 0.96939325 | 1 |
| SENESE_HDA   | 106 | -0.2385291 | -0.661691  | 0.9531568  | 0.9702911  | 1 |
| WAMUNYOKI    | 227 | -0.2490672 | -0.6374595 | 0.9720149  | 0.9754081  | 1 |
| KEGG_LONG_   | 67  | -0.2131573 | -0.6278753 | 0.97115386 | 0.9755457  | 1 |
| NIKOLSKY_BR  | 299 | -0.2533623 | -0.6230111 | 0.9720149  | 0.9762877  | 1 |
| GEORGES_CE   | 58  | -0.2531993 | -0.6112686 | 0.920082   | 0.98059565 | 1 |

RANK AT MA\ LEADING EDGE

3049 tags=47%, list=15%, signal=55%  
4164 tags=61%, list=20%, signal=76%  
1722 tags=65%, list=8%, signal=71%  
2520 tags=42%, list=12%, signal=48%  
4381 tags=71%, list=21%, signal=89%  
3050 tags=58%, list=15%, signal=67%  
4426 tags=68%, list=21%, signal=87%  
3837 tags=63%, list=19%, signal=76%  
4381 tags=67%, list=21%, signal=84%  
3815 tags=52%, list=18%, signal=63%  
3569 tags=51%, list=17%, signal=61%  
3196 tags=54%, list=15%, signal=64%  
3826 tags=55%, list=19%, signal=66%  
2619 tags=35%, list=13%, signal=40%  
4381 tags=67%, list=21%, signal=85%  
2559 tags=42%, list=12%, signal=48%  
5177 tags=65%, list=25%, signal=87%  
3112 tags=47%, list=15%, signal=55%  
4084 tags=53%, list=20%, signal=65%  
3432 tags=50%, list=17%, signal=59%  
3471 tags=62%, list=17%, signal=74%  
4083 tags=57%, list=20%, signal=70%  
4846 tags=60%, list=23%, signal=78%  
2646 tags=45%, list=13%, signal=52%  
4154 tags=53%, list=20%, signal=66%  
4381 tags=68%, list=21%, signal=86%  
4381 tags=68%, list=21%, signal=86%  
4192 tags=67%, list=20%, signal=84%  
3732 tags=42%, list=18%, signal=51%  
5034 tags=61%, list=24%, signal=81%  
3616 tags=67%, list=18%, signal=80%  
4542 tags=48%, list=22%, signal=61%  
4100 tags=59%, list=20%, signal=73%  
4332 tags=59%, list=21%, signal=75%  
4100 tags=60%, list=20%, signal=75%  
4212 tags=55%, list=20%, signal=69%  
4218 tags=58%, list=20%, signal=72%  
4192 tags=68%, list=20%, signal=85%  
2526 tags=35%, list=12%, signal=39%  
4582 tags=53%, list=22%, signal=67%

3513 tags=61%, list=17%, signal=73%  
4453 tags=57%, list=22%, signal=73%  
3159 tags=52%, list=15%, signal=60%  
4289 tags=59%, list=21%, signal=75%  
4426 tags=58%, list=21%, signal=73%  
3671 tags=47%, list=18%, signal=57%  
2624 tags=38%, list=13%, signal=44%  
4381 tags=67%, list=21%, signal=84%  
4426 tags=63%, list=21%, signal=80%  
3448 tags=51%, list=17%, signal=61%  
3159 tags=54%, list=15%, signal=63%  
4076 tags=47%, list=20%, signal=58%  
5177 tags=66%, list=25%, signal=87%  
3967 tags=48%, list=19%, signal=59%  
4390 tags=57%, list=21%, signal=71%  
3141 tags=42%, list=15%, signal=49%  
3837 tags=52%, list=19%, signal=64%  
3903 tags=46%, list=19%, signal=57%  
3837 tags=65%, list=19%, signal=80%  
4402 tags=60%, list=21%, signal=76%  
3091 tags=36%, list=15%, signal=42%  
4381 tags=67%, list=21%, signal=84%  
2999 tags=33%, list=15%, signal=38%  
3446 tags=50%, list=17%, signal=60%  
3605 tags=51%, list=17%, signal=61%  
4054 tags=42%, list=20%, signal=52%  
3671 tags=43%, list=18%, signal=51%  
4734 tags=57%, list=23%, signal=74%  
2193 tags=26%, list=11%, signal=29%  
4381 tags=67%, list=21%, signal=85%  
4504 tags=54%, list=22%, signal=69%  
2624 tags=49%, list=13%, signal=56%  
5177 tags=63%, list=25%, signal=84%  
2875 tags=47%, list=14%, signal=55%  
2884 tags=40%, list=14%, signal=47%  
4177 tags=63%, list=20%, signal=79%  
3377 tags=48%, list=16%, signal=57%  
4394 tags=66%, list=21%, signal=83%  
4562 tags=45%, list=22%, signal=58%  
4504 tags=49%, list=22%, signal=62%  
3855 tags=50%, list=19%, signal=62%

4192 tags=67%, list=20%, signal=83%  
5177 tags=65%, list=25%, signal=86%  
4426 tags=66%, list=21%, signal=84%  
3603 tags=36%, list=17%, signal=44%  
4381 tags=63%, list=21%, signal=79%  
5177 tags=62%, list=25%, signal=83%  
2450 tags=38%, list=12%, signal=43%  
4279 tags=47%, list=21%, signal=59%  
5177 tags=60%, list=25%, signal=80%  
3536 tags=56%, list=17%, signal=67%  
3005 tags=48%, list=15%, signal=56%  
3961 tags=46%, list=19%, signal=57%  
2808 tags=28%, list=14%, signal=32%  
4229 tags=66%, list=20%, signal=83%  
5299 tags=55%, list=26%, signal=74%  
3571 tags=37%, list=17%, signal=44%  
4813 tags=48%, list=23%, signal=62%  
3416 tags=47%, list=17%, signal=56%  
4035 tags=55%, list=20%, signal=67%  
4198 tags=49%, list=20%, signal=60%  
3447 tags=30%, list=17%, signal=35%  
3967 tags=53%, list=19%, signal=65%  
4230 tags=56%, list=20%, signal=70%  
5177 tags=60%, list=25%, signal=80%  
3569 tags=36%, list=17%, signal=44%  
3424 tags=34%, list=17%, signal=40%  
3448 tags=41%, list=17%, signal=49%  
4167 tags=58%, list=20%, signal=71%  
3405 tags=36%, list=16%, signal=42%  
3376 tags=30%, list=16%, signal=36%  
5250 tags=50%, list=25%, signal=67%  
4045 tags=38%, list=20%, signal=48%  
4292 tags=52%, list=21%, signal=65%  
4381 tags=62%, list=21%, signal=79%  
5181 tags=53%, list=25%, signal=70%  
3691 tags=55%, list=18%, signal=66%  
2401 tags=23%, list=12%, signal=26%  
3723 tags=37%, list=18%, signal=45%  
4355 tags=63%, list=21%, signal=79%  
3921 tags=43%, list=19%, signal=53%  
4198 tags=46%, list=20%, signal=57%



3791 tags=43%, list=18%, signal=53%  
3040 tags=42%, list=15%, signal=50%  
3789 tags=35%, list=18%, signal=42%  
2812 tags=34%, list=14%, signal=40%  
5181 tags=49%, list=25%, signal=65%  
3513 tags=43%, list=17%, signal=52%  
4385 tags=63%, list=21%, signal=80%  
4722 tags=44%, list=23%, signal=57%  
2685 tags=27%, list=13%, signal=31%  
4407 tags=52%, list=21%, signal=65%  
4110 tags=40%, list=20%, signal=50%  
3986 tags=55%, list=19%, signal=67%  
3374 tags=38%, list=16%, signal=45%  
3730 tags=35%, list=18%, signal=42%  
3032 tags=17%, list=15%, signal=20%  
4411 tags=47%, list=21%, signal=59%  
4177 tags=44%, list=20%, signal=54%  
4015 tags=25%, list=19%, signal=31%  
1702 tags=17%, list=8%, signal=18%  
3800 tags=41%, list=18%, signal=50%  
3796 tags=36%, list=18%, signal=44%  
3218 tags=17%, list=16%, signal=20%  
4385 tags=73%, list=21%, signal=93%  
4547 tags=45%, list=22%, signal=57%  
3852 tags=30%, list=19%, signal=37%  
4209 tags=55%, list=20%, signal=69%  
3837 tags=40%, list=19%, signal=48%  
3750 tags=44%, list=18%, signal=54%  
3325 tags=35%, list=16%, signal=41%  
3134 tags=37%, list=15%, signal=43%  
1572 tags=26%, list=8%, signal=28%  
2975 tags=20%, list=14%, signal=24%  
4372 tags=74%, list=21%, signal=94%  
3090 tags=39%, list=15%, signal=45%  
3296 tags=40%, list=16%, signal=47%  
4424 tags=62%, list=21%, signal=78%  
3972 tags=41%, list=19%, signal=50%  
1431 tags=8%, list=7%, signal=9%  
4092 tags=60%, list=20%, signal=74%  
2927 tags=31%, list=14%, signal=36%  
3266 tags=35%, list=16%, signal=41%

3159 tags=32%, list=15%, signal=38%  
3990 tags=46%, list=19%, signal=56%  
4296 tags=52%, list=21%, signal=65%  
1573 tags=6%, list=8%, signal=6%  
1532 tags=28%, list=7%, signal=30%  
2699 tags=26%, list=13%, signal=30%  
2683 tags=38%, list=13%, signal=44%  
4303 tags=45%, list=21%, signal=56%  
4385 tags=44%, list=21%, signal=56%  
3530 tags=44%, list=17%, signal=53%  
3667 tags=39%, list=18%, signal=47%  
2434 tags=32%, list=12%, signal=36%  
1712 tags=12%, list=8%, signal=13%  
4385 tags=63%, list=21%, signal=79%  
4381 tags=52%, list=21%, signal=66%  
3275 tags=31%, list=16%, signal=37%  
3275 tags=37%, list=16%, signal=43%  
4095 tags=39%, list=20%, signal=47%  
3099 tags=28%, list=15%, signal=32%  
4102 tags=47%, list=20%, signal=57%  
2444 tags=18%, list=12%, signal=20%  
3961 tags=37%, list=19%, signal=45%  
2369 tags=20%, list=11%, signal=22%  
4093 tags=33%, list=20%, signal=41%  
3817 tags=41%, list=18%, signal=49%  
4385 tags=52%, list=21%, signal=65%  
3851 tags=45%, list=19%, signal=55%  
2856 tags=27%, list=14%, signal=31%  
2618 tags=20%, list=13%, signal=23%  
4265 tags=45%, list=21%, signal=56%  
3218 tags=27%, list=16%, signal=31%  
4161 tags=31%, list=20%, signal=38%  
4385 tags=51%, list=21%, signal=64%  
4341 tags=36%, list=21%, signal=45%  
4192 tags=52%, list=20%, signal=65%  
4385 tags=53%, list=21%, signal=67%  
3584 tags=25%, list=17%, signal=30%  
4411 tags=44%, list=21%, signal=56%  
4341 tags=41%, list=21%, signal=51%  
4411 tags=43%, list=21%, signal=54%  
4272 tags=35%, list=21%, signal=43%

2430 tags=19%, list=12%, signal=21%  
1641 tags=19%, list=8%, signal=20%  
1152 tags=10%, list=6%, signal=10%  
3596 tags=41%, list=17%, signal=50%  
2360 tags=34%, list=11%, signal=38%  
2758 tags=33%, list=13%, signal=38%  
4177 tags=42%, list=20%, signal=53%  
2108 tags=14%, list=10%, signal=16%  
3903 tags=35%, list=19%, signal=43%  
2601 tags=24%, list=13%, signal=27%  
3878 tags=18%, list=19%, signal=22%  
3725 tags=35%, list=18%, signal=43%  
3377 tags=37%, list=16%, signal=44%  
4385 tags=50%, list=21%, signal=63%  
4183 tags=44%, list=20%, signal=55%  
2609 tags=20%, list=13%, signal=22%  
3961 tags=41%, list=19%, signal=51%  
4460 tags=47%, list=22%, signal=60%  
4259 tags=44%, list=21%, signal=55%  
4772 tags=51%, list=23%, signal=67%  
2535 tags=18%, list=12%, signal=20%  
2490 tags=22%, list=12%, signal=25%  
3342 tags=28%, list=16%, signal=33%  
4510 tags=47%, list=22%, signal=60%  
3945 tags=42%, list=19%, signal=51%  
4647 tags=47%, list=23%, signal=60%  
2650 tags=21%, list=13%, signal=24%  
3275 tags=35%, list=16%, signal=42%  
3275 tags=35%, list=16%, signal=42%  
1649 tags=16%, list=8%, signal=17%  
3801 tags=28%, list=18%, signal=33%  
3040 tags=26%, list=15%, signal=31%  
3972 tags=34%, list=19%, signal=42%  
3952 tags=38%, list=19%, signal=46%  
3499 tags=30%, list=17%, signal=35%  
2703 tags=26%, list=13%, signal=30%  
4411 tags=46%, list=21%, signal=59%  
1720 tags=23%, list=8%, signal=25%  
2721 tags=22%, list=13%, signal=25%  
2746 tags=32%, list=13%, signal=36%  
5119 tags=51%, list=25%, signal=66%

3289 tags=31%, list=16%, signal=36%  
4097 tags=39%, list=20%, signal=48%  
1720 tags=23%, list=8%, signal=25%  
3677 tags=30%, list=18%, signal=36%  
3236 tags=21%, list=16%, signal=25%  
3200 tags=23%, list=15%, signal=27%  
3750 tags=27%, list=18%, signal=33%  
3525 tags=22%, list=17%, signal=27%  
3001 tags=34%, list=15%, signal=39%  
3317 tags=26%, list=16%, signal=31%  
4158 tags=43%, list=20%, signal=53%  
4209 tags=43%, list=20%, signal=53%  
3289 tags=29%, list=16%, signal=34%  
2816 tags=28%, list=14%, signal=32%  
3903 tags=41%, list=19%, signal=50%  
4301 tags=47%, list=21%, signal=60%  
4316 tags=34%, list=21%, signal=43%  
2391 tags=30%, list=12%, signal=33%  
3949 tags=42%, list=19%, signal=52%  
3196 tags=21%, list=15%, signal=24%  
2472 tags=21%, list=12%, signal=23%  
3331 tags=33%, list=16%, signal=40%  
4059 tags=37%, list=20%, signal=45%  
4292 tags=40%, list=21%, signal=49%  
4099 tags=33%, list=20%, signal=41%  
1406 tags=21%, list=7%, signal=22%  
3970 tags=17%, list=19%, signal=21%  
1698 tags=13%, list=8%, signal=14%  
4247 tags=23%, list=21%, signal=29%  
831 tags=7%, list=4%, signal=7%  
3840 tags=39%, list=19%, signal=47%  
3349 tags=23%, list=16%, signal=27%  
2003 tags=17%, list=10%, signal=18%  
1509 tags=10%, list=7%, signal=10%  
3767 tags=35%, list=18%, signal=42%  
4608 tags=47%, list=22%, signal=61%  
1911 tags=22%, list=9%, signal=25%  
3005 tags=23%, list=15%, signal=27%  
2683 tags=33%, list=13%, signal=38%  
3918 tags=30%, list=19%, signal=37%  
3004 tags=21%, list=15%, signal=24%

2995 tags=29%, list=15%, signal=34%  
4170 tags=28%, list=20%, signal=35%  
5320 tags=40%, list=26%, signal=54%  
3947 tags=23%, list=19%, signal=28%  
4272 tags=45%, list=21%, signal=57%  
2042 tags=19%, list=10%, signal=21%  
4251 tags=39%, list=21%, signal=48%  
1970 tags=15%, list=10%, signal=17%  
2466 tags=27%, list=12%, signal=30%  
2466 tags=27%, list=12%, signal=30%  
3848 tags=29%, list=19%, signal=36%  
4732 tags=43%, list=23%, signal=56%  
3294 tags=29%, list=16%, signal=34%  
1521 tags=15%, list=7%, signal=16%  
1739 tags=14%, list=8%, signal=15%  
2403 tags=15%, list=12%, signal=17%  
3173 tags=18%, list=15%, signal=22%  
3867 tags=35%, list=19%, signal=42%  
3610 tags=24%, list=17%, signal=29%  
3237 tags=22%, list=16%, signal=25%  
3186 tags=30%, list=15%, signal=36%  
4092 tags=38%, list=20%, signal=47%  
1538 tags=13%, list=7%, signal=14%  
3617 tags=39%, list=18%, signal=47%  
4248 tags=32%, list=21%, signal=40%  
3918 tags=36%, list=19%, signal=44%  
2621 tags=22%, list=13%, signal=25%  
2032 tags=11%, list=10%, signal=12%  
2214 tags=19%, list=11%, signal=22%  
4998 tags=46%, list=24%, signal=60%  
3533 tags=26%, list=17%, signal=31%  
1180 tags=11%, list=6%, signal=12%  
3368 tags=25%, list=16%, signal=29%  
3173 tags=27%, list=15%, signal=32%  
3042 tags=25%, list=15%, signal=29%  
4176 tags=38%, list=20%, signal=47%  
4210 tags=42%, list=20%, signal=53%  
2690 tags=21%, list=13%, signal=24%  
141 tags=4%, list=1%, signal=4%  
2879 tags=19%, list=14%, signal=22%  
3678 tags=34%, list=18%, signal=41%

4001 tags=27%, list=19%, signal=33%  
4552 tags=40%, list=22%, signal=51%  
3038 tags=24%, list=15%, signal=27%  
3047 tags=23%, list=15%, signal=26%  
2866 tags=20%, list=14%, signal=23%  
3677 tags=33%, list=18%, signal=39%  
2431 tags=13%, list=12%, signal=14%  
4158 tags=39%, list=20%, signal=48%  
4373 tags=35%, list=21%, signal=44%  
3189 tags=25%, list=15%, signal=29%  
3745 tags=31%, list=18%, signal=37%  
2321 tags=20%, list=11%, signal=22%  
3449 tags=26%, list=17%, signal=31%  
3605 tags=33%, list=17%, signal=40%  
3990 tags=35%, list=19%, signal=43%  
1171 tags=9%, list=6%, signal=10%  
2413 tags=12%, list=12%, signal=13%  
4102 tags=38%, list=20%, signal=47%  
2448 tags=18%, list=12%, signal=20%  
3805 tags=30%, list=18%, signal=36%  
3386 tags=21%, list=16%, signal=25%  
3624 tags=24%, list=18%, signal=29%  
4194 tags=25%, list=20%, signal=31%  
1509 tags=8%, list=7%, signal=9%  
3884 tags=29%, list=19%, signal=35%  
3509 tags=25%, list=17%, signal=30%  
4242 tags=37%, list=21%, signal=46%  
2643 tags=25%, list=13%, signal=29%  
4248 tags=33%, list=21%, signal=41%  
4052 tags=27%, list=20%, signal=32%  
3707 tags=23%, list=18%, signal=28%  
2490 tags=21%, list=12%, signal=24%  
2044 tags=17%, list=10%, signal=19%  
4411 tags=34%, list=21%, signal=43%  
3961 tags=32%, list=19%, signal=39%  
5398 tags=35%, list=26%, signal=48%  
1674 tags=15%, list=8%, signal=17%  
3160 tags=15%, list=15%, signal=18%  
2896 tags=24%, list=14%, signal=28%  
2650 tags=21%, list=13%, signal=23%  
2363 tags=9%, list=11%, signal=10%

4229 tags=34%, list=20%, signal=42%  
2430 tags=14%, list=12%, signal=16%  
2631 tags=17%, list=13%, signal=19%  
5386 tags=14%, list=26%, signal=19%  
2881 tags=17%, list=14%, signal=20%  
3314 tags=20%, list=16%, signal=24%  
4178 tags=40%, list=20%, signal=50%  
3468 tags=30%, list=17%, signal=36%  
1364 tags=7%, list=7%, signal=8%  
4292 tags=34%, list=21%, signal=43%  
4220 tags=37%, list=20%, signal=46%  
3775 tags=30%, list=18%, signal=36%  
3329 tags=28%, list=16%, signal=33%  
238 tags=1%, list=1%, signal=1%  
2925 tags=21%, list=14%, signal=24%  
5305 tags=50%, list=26%, signal=67%  
4411 tags=41%, list=21%, signal=52%  
2943 tags=25%, list=14%, signal=29%  
3440 tags=20%, list=17%, signal=24%  
4248 tags=44%, list=21%, signal=55%  
3530 tags=25%, list=17%, signal=29%  
3490 tags=26%, list=17%, signal=32%  
2436 tags=13%, list=12%, signal=15%  
2035 tags=6%, list=10%, signal=7%  
3244 tags=20%, list=16%, signal=24%  
3049 tags=21%, list=15%, signal=24%  
3795 tags=27%, list=18%, signal=33%  
3651 tags=27%, list=18%, signal=33%  
3651 tags=27%, list=18%, signal=33%  
4387 tags=28%, list=21%, signal=35%  
4012 tags=33%, list=19%, signal=41%  
4114 tags=37%, list=20%, signal=45%  
2217 tags=16%, list=11%, signal=18%  
3966 tags=37%, list=19%, signal=45%  
3750 tags=30%, list=18%, signal=36%  
4968 tags=36%, list=24%, signal=47%  
3236 tags=20%, list=16%, signal=23%  
3347 tags=22%, list=16%, signal=25%  
4045 tags=36%, list=20%, signal=44%  
3387 tags=29%, list=16%, signal=35%  
2760 tags=14%, list=13%, signal=16%

3995 tags=33%, list=19%, signal=41%  
4261 tags=29%, list=21%, signal=37%  
4045 tags=24%, list=20%, signal=30%  
3050 tags=14%, list=15%, signal=16%  
3399 tags=23%, list=16%, signal=27%  
2402 tags=19%, list=12%, signal=21%  
2879 tags=29%, list=14%, signal=33%  
2733 tags=16%, list=13%, signal=18%  
3680 tags=30%, list=18%, signal=36%  
3571 tags=19%, list=17%, signal=23%  
2579 tags=15%, list=12%, signal=18%  
3732 tags=22%, list=18%, signal=27%  
2879 tags=10%, list=14%, signal=12%  
3718 tags=33%, list=18%, signal=40%  
3410 tags=23%, list=17%, signal=28%  
3917 tags=34%, list=19%, signal=41%  
4585 tags=35%, list=22%, signal=44%  
2873 tags=20%, list=14%, signal=23%  
3763 tags=22%, list=18%, signal=27%  
4746 tags=40%, list=23%, signal=52%  
3234 tags=25%, list=16%, signal=29%  
5022 tags=39%, list=24%, signal=51%  
3044 tags=24%, list=15%, signal=29%  
2044 tags=16%, list=10%, signal=18%  
2042 tags=12%, list=10%, signal=14%  
1762 tags=16%, list=9%, signal=17%  
4295 tags=28%, list=21%, signal=34%  
4177 tags=25%, list=20%, signal=31%  
2627 tags=22%, list=13%, signal=24%  
3687 tags=28%, list=18%, signal=34%  
3274 tags=33%, list=16%, signal=39%  
1989 tags=13%, list=10%, signal=14%  
1480 tags=10%, list=7%, signal=11%  
878 tags=7%, list=4%, signal=7%  
2808 tags=14%, list=14%, signal=17%  
4519 tags=41%, list=22%, signal=52%  
3526 tags=22%, list=17%, signal=27%  
2042 tags=15%, list=10%, signal=17%  
2357 tags=23%, list=11%, signal=26%  
4215 tags=33%, list=20%, signal=42%  
3878 tags=15%, list=19%, signal=18%



3382 tags=30%, list=16%, signal=35%  
3468 tags=25%, list=17%, signal=30%  
3961 tags=20%, list=19%, signal=24%  
4160 tags=28%, list=20%, signal=34%  
4154 tags=33%, list=20%, signal=41%  
3575 tags=16%, list=17%, signal=20%  
3526 tags=25%, list=17%, signal=30%  
3275 tags=26%, list=16%, signal=31%  
4453 tags=36%, list=22%, signal=46%  
3680 tags=22%, list=18%, signal=26%  
3742 tags=20%, list=18%, signal=25%  
4393 tags=37%, list=21%, signal=47%  
3959 tags=27%, list=19%, signal=34%  
2720 tags=18%, list=13%, signal=21%  
4229 tags=23%, list=20%, signal=28%  
2466 tags=23%, list=12%, signal=26%  
3386 tags=23%, list=16%, signal=27%  
3358 tags=15%, list=16%, signal=18%  
1394 tags=11%, list=7%, signal=12%  
3837 tags=28%, list=19%, signal=35%  
2950 tags=19%, list=14%, signal=22%  
4586 tags=24%, list=22%, signal=31%  
4338 tags=41%, list=21%, signal=51%  
4730 tags=34%, list=23%, signal=44%  
2484 tags=20%, list=12%, signal=22%  
5125 tags=43%, list=25%, signal=57%  
3567 tags=23%, list=17%, signal=28%  
3586 tags=14%, list=17%, signal=16%  
4540 tags=24%, list=22%, signal=30%  
4214 tags=30%, list=20%, signal=37%  
2218 tags=5%, list=11%, signal=6%  
3862 tags=27%, list=19%, signal=32%  
3852 tags=25%, list=19%, signal=30%  
4327 tags=14%, list=21%, signal=18%  
3391 tags=25%, list=16%, signal=30%  
2600 tags=17%, list=13%, signal=19%  
2758 tags=17%, list=13%, signal=20%  
3467 tags=20%, list=17%, signal=23%  
2740 tags=19%, list=13%, signal=21%  
3841 tags=19%, list=19%, signal=22%  
3126 tags=21%, list=15%, signal=25%

1984 tags=13%, list=10%, signal=14%  
3970 tags=25%, list=19%, signal=31%  
4187 tags=25%, list=20%, signal=32%  
3880 tags=26%, list=19%, signal=31%  
3858 tags=16%, list=19%, signal=20%  
2187 tags=16%, list=11%, signal=17%  
4678 tags=43%, list=23%, signal=56%
