# Supplementary material
Source: PubMed Central journal article supplement (PMC4086945)
Supplement: NIHMS601620-supplement-supplemental_table_2.pdf [file NIHMS601620-supplement-supplemental_table_2.pdf]

| Name       | Description | z-score_P1 | z-score_P2 | z-score_N1 | z-score_N2 |
|------------|-------------|------------|------------|------------|------------|
| TRCN000007 | ACIN1       | 0.396      | 0.462      | -1.228     | -0.658     |
| TRCN000007 | ACIN1       | 1.076      | 1.016      | -1.609     | -0.037     |
| TRCN000007 | ACIN1       | 0.246      | 0.09       | 0.127      | -0.699     |
| TRCN000007 | ACIN1       | 0.511      | 0.489      | 1.388      | 1.203      |
| TRCN000001 | AIRE        | -0.878     | -0.845     | 0.334      | 0.552      |
| TRCN000001 | AIRE        | -2.133     | -2.152     | 1.203      | 1.46       |
| TRCN000001 | AIRE        | -0.393     | -0.461     | 1.277      | 1.597      |
| TRCN000004 | AOF1        | 1.516      | 1.596      | 1.103      | 1.136      |
| TRCN000004 | AOF1        | -1.262     | -1.483     | 0.748      | 0.906      |
| TRCN000004 | AOF1        | -0.498     | -0.34      | 0.347      | 0.635      |
| TRCN000004 | AOF1        | 0.415      | 0.531      | 0.748      | 0.846      |
| TRCN000005 | ARID1A      | -1.581     | -1.665     | -1.803     | -1.756     |
| TRCN000005 | ARID1A      | -1.807     | -2.038     | -1.419     | -1.395     |
| TRCN000005 | ARID1A      | -1.583     | -1.622     | -1.254     | -1.122     |
| TRCN000005 | ARID1A      | -0.912     | -0.836     | -0.382     | -0.206     |
| TRCN000005 | ARID1A      | 0.079      | 0.012      | 0.127      | 0.361      |
| TRCN000010 | ARID1B      | -0.16      | 0.144      | 0.371      | 0.517      |
| TRCN000010 | ARID1B      | -0.438     | -0.726     | 0.533      | 0.592      |
| TRCN000010 | ARID1B      | -1.727     | -1.601     | -1.194     | -1.161     |
| TRCN000010 | ARID1B      | 0.243      | 0.107      | -0.941     | -0.883     |
| TRCN000010 | ARID1B      | -1.107     | -0.668     | -1.008     | -1.004     |
| TRCN000001 | ARID3A      | -1.042     | -1.321     | -1.714     | -1.694     |
| TRCN000001 | ARID3A      | 1.215      | 0.862      | 1.312      | 1.905      |
| TRCN000001 | ARID3A      | -0.341     | -0.269     | -2.056     | -2.037     |
| TRCN000001 | ARID3A      | -0.034     | 0.128      | 0.473      | 0.552      |
| TRCN000001 | ARID3A      | 1.388      | 0.988      | 1.121      | 1.388      |
| TRCN000015 | ARID3B      | 1.013      | 0.431      | 1.486      | 1.512      |
| TRCN000015 | ARID3B      | -1.041     | -1.008     | 0.401      | 0.522      |
| TRCN000015 | ARID3B      | -0.81      | -1.055     | -0.722     | -0.503     |
| TRCN000015 | ARID3B      | 0.91       | 1.535      | 1.625      | 1.738      |
| TRCN000015 | ARID3B      | -1.107     | -0.997     | -0.569     | -0.405     |
| TRCN000014 | ARID4B      | 1.032      | 0.988      | 1.425      | 1.497      |
| TRCN000014 | ARID4B      | 0.031      | -0.025     | -1.355     | -1.051     |
| TRCN000014 | ARID4B      | 1.004      | 1.295      | 1.682      | 1.801      |
| TRCN000014 | ARID4B      | 2.226      | 1.752      | 1.396      | 1.487      |
| TRCN000015 | ARID4B      | -0.39      | -0.456     | -0.542     | -0.536     |
| TRCN000015 | ARID5A      | 0.4        | -0.044     | 0.564      | 0.757      |
| TRCN000015 | ARID5A      | 0.391      | 0.656      | -0.045     | 0.299      |
| TRCN000015 | ARID5A      | 0.213      | 0.238      | -1.347     | -1.279     |
| TRCN000015 | ARID5A      | -0.553     | -0.528     | 0.05       | 0.128      |

|                   |        |        |        |        |
|-------------------|--------|--------|--------|--------|
| TRCN000015:ARID5A | 1.723  | 1.906  | 0.021  | 0.164  |
| TRCN000015:ARID5B | -0.2   | -0.183 | -0.537 | 0.675  |
| TRCN000015:ARID5B | 0.686  | 0.716  | -0.897 | 2.649  |
| TRCN000015:ARID5B | -0.132 | -0.096 | -1.051 | 1.691  |
| TRCN000015:ARID5B | 1.551  | 1.475  | -1.133 | 1.771  |
| TRCN000003:AS3MT  | -0.663 | -0.695 | 0.463  | 1.327  |
| TRCN000003:AS3MT  | 1.156  | 1.333  | -0.136 | 0.195  |
| TRCN000007:ASF1A  | 1.049  | 1.348  | 0.057  | 0.231  |
| TRCN000007:ASF1A  | 0.55   | 0.585  | -0.575 | -0.434 |
| TRCN000007:ASF1A  | -0.656 | -1.047 | -0.17  | 0.137  |
| TRCN000007:ASF1A  | 0.458  | -0.173 | 0.311  | 0.615  |
| TRCN000007:ASF1A  | -0.583 | -0.397 | -0.628 | -0.553 |
| TRCN000007:ASF1B  | -0.182 | -0.102 | -1.238 | -1.185 |
| TRCN000007:ASF1B  | -0.691 | -0.805 | -0.474 | -0.271 |
| TRCN000007:ASF1B  | -0.143 | 0.192  | -0.576 | -0.521 |
| TRCN000001:ASH1L  | 1.193  | 0.994  | -1.533 | -1.357 |
| TRCN000001:ASH1L  | 1.059  | 0.718  | 1.139  | 1.196  |
| TRCN000001:ASH1L  | 0.868  | 0.956  | 0.712  | 0.745  |
| TRCN000001:ASH1L  | 0.405  | -0.287 | 0.385  | 0.644  |
| TRCN000001:ASH2L  | -1.429 | -1.368 | -0.924 | -0.881 |
| TRCN000001:ASH2L  | 0.482  | 0.648  | 0.221  | 0.336  |
| TRCN000001:ASH2L  | 1.299  | 0.743  | 1.262  | 1.464  |
| TRCN000001:ASH2L  | 0.337  | 0.832  | 0.936  | 1.133  |
| TRCN000013:ASXL1  | 1.562  | 1.133  | 1.223  | 1.559  |
| TRCN000013:ASXL1  | 0.234  | 0.75   | 0.188  | 0.414  |
| TRCN000013:ASXL1  | -0.545 | -0.485 | -1.29  | -1.187 |
| TRCN000013:ASXL1  | -0.769 | -0.799 | -0.361 | -0.039 |
| TRCN000013:ASXL1  | -0.94  | -0.753 | 0.87   | 0.91   |
| TRCN000001:BAZ1B  | 1.55   | 1.459  | 0.384  | 0.584  |
| TRCN000001:BAZ1B  | -0.47  | -0.404 | -1.102 | -0.73  |
| TRCN000001:BAZ1B  | 0.886  | 0.843  | -1.369 | -1.022 |
| TRCN000001:BRD1   | -0.922 | -1.081 | 0.344  | 0.43   |
| TRCN000001:BRD1   | -0.711 | -0.705 | 0.475  | 0.489  |
| TRCN000001:BRD1   | -1.25  | -1.031 | 0.415  | 0.49   |
| TRCN000001:BRD1   | -0.805 | -0.728 | -1.585 | -1.561 |
| TRCN000000:BRD2   | -0.609 | -0.264 | -0.944 | -0.625 |
| TRCN000000:BRD2   | 0.634  | 1.171  | -0.165 | -0.068 |
| TRCN000000:BRD2   | -0.084 | -0.36  | -0.167 | 0.085  |
| TRCN000000:BRD2   | 0.205  | 1.164  | 0.585  | 0.699  |
| TRCN000000:BRD2   | -1.422 | -1.796 | -0.273 | -0.21  |
| TRCN000002:BRD3   | 0.851  | 0.827  | 1.223  | 1.256  |

|                     |        |        |        |        |
|---------------------|--------|--------|--------|--------|
| TRCN000002:BRD3     | 1.551  | 1.368  | 0.958  | 1.29   |
| TRCN000002:BRD3     | 1.174  | 0.739  | 0.816  | 0.912  |
| TRCN000002:BRD3     | 0.513  | 0.081  | -1.249 | -1.17  |
| TRCN000002:BRD3     | 0.077  | 0.094  | 0.427  | 0.5    |
| TRCN000019:BRD3     | 0.513  | 1.578  | 0.344  | -0.101 |
| TRCN000019:BRD3     | 1.014  | 0.295  | 0.971  | 1.328  |
| TRCN000019:BRD3     | -0.384 | -0.113 | -0.118 | -0.14  |
| TRCN000019:BRD3     | -0.213 | -0.036 | -1.124 | -0.565 |
| TRCN000002:BRD4     | -1.105 | -1.107 | 1.194  | 0.445  |
| TRCN000002:BRD4     | -0.971 | -0.757 | -0.329 | 0.393  |
| TRCN000002:BRD4     | -1.146 | -1.398 | -0.516 | 1.277  |
| TRCN000002:BRD4     | -2.483 | -2.591 | -1.935 | 0.557  |
| TRCN000002:BRD4     | -1.318 | -1.38  | 0.004  | 1.336  |
| TRCN000019:BRD4     | -0.136 | 0.906  | 0.012  | -0.622 |
| TRCN000019:BRD4     | -1.493 | -1.274 | -1.276 | 0.111  |
| TRCN000019:BRD4     | -0.903 | -1.372 | -0.828 | 0.414  |
| TRCN000019:BRD4     | -0.116 | -0.197 | -1.514 | 1.075  |
| TRCN000019:BRD4     | 1.532  | 1.181  | -0.983 | 0.787  |
| TRCN000015:BRD7     | -0.719 | -0.79  | -0.537 | -0.989 |
| TRCN000015:BRD7     | -0.197 | -0.498 | -0.828 | -0.939 |
| TRCN000015:BRD7     | -0.58  | -0.615 | -0.706 | -1.046 |
| TRCN000015:BRD7     | 0.604  | 1.728  | -1.735 | 0.059  |
| TRCN000001:BRD8     | 0.631  | 0.614  | 0.812  | 0.08   |
| TRCN000001:BRD8     | 0.606  | 0.509  | 0.881  | 1.306  |
| TRCN000012:BRD9     | -0.421 | -0.236 | -0.619 | 0.488  |
| TRCN000012:BRD9     | 1.327  | 1.307  | 0.641  | 0.392  |
| TRCN000013:BRD9     | -0.401 | -0.095 | -1.76  | 1.862  |
| TRCN000000:BRDT     | 0.54   | 1.4    | -0.892 | 1.038  |
| TRCN000000:BRDT     | 1.23   | 1.124  | -1.051 | 1.763  |
| TRCN000000:BRDT     | -0.702 | -0.603 | -0.582 | 1.664  |
| TRCN000019:BRDT     | -0.98  | -1.074 | -0.613 | 0.518  |
| TRCN000019:BRDT     | 0.118  | 0.71   | -1.691 | -0.607 |
| TRCN000019:BRDT     | 0.325  | 0.569  | 1.107  | -0.731 |
| TRCN000019:BRDT     | -0.726 | -0.716 | -0.417 | 0      |
| TRCN000019:BRDT     | -0.798 | -1.078 | -0.127 | -0.25  |
| TRCN000015:C20orf20 | 0.524  | 0.527  | -1.35  | -0.654 |
| TRCN000015:C20orf20 | 0.803  | 0.985  | 0.596  | -0.057 |
| TRCN000015:C20orf20 | 1.294  | 1.425  | 0.369  | 0.271  |
| TRCN000015:C20orf7  | -0.24  | -0.864 | -0.224 | 1.998  |
| TRCN000015:C20orf7  | 0.655  | 0.775  | 0.727  | 0.428  |
| TRCN000016:C20orf7  | 0.816  | 0.678  | -0.967 | 0.74   |

|                    |        |        |        |        |
|--------------------|--------|--------|--------|--------|
| TRCN000016(C2orf7  | 0.905  | 0.638  | -0.709 | -0.612 |
| TRCN000013(C2orf60 | 0.837  | 1.027  | -0.684 | 0.442  |
| TRCN000006:CBX1    | 0.346  | 0.895  | 1.018  | 1.467  |
| TRCN000006:CBX1    | 0.506  | 0.413  | 0.126  | -0.117 |
| TRCN000002(CBX2    | -1.734 | -1.477 | -1.186 | -0.975 |
| TRCN000002(CBX2    | 0.403  | 0.097  | 0.821  | 0.609  |
| TRCN000002(CBX2    | 0.136  | 1.488  | 0.519  | 0.991  |
| TRCN000000:CBX4    | 0.143  | 0.183  | -0.085 | 1.19   |
| TRCN000000:CBX4    | 1.117  | 1.157  | -0.043 | 1.175  |
| TRCN000000:CBX4    | 0.804  | 1.468  | 1.879  | -0.121 |
| TRCN000001(CBX4    | 0.265  | 0.259  | 0.459  | 1.11   |
| TRCN000001(CBX4    | 2.643  | 2.094  | -0.069 | 1.707  |
| TRCN000006:CBX5    | -0.033 | -0.269 | -0.562 | 0.445  |
| TRCN000006:CBX5    | 0.99   | 0.642  | 0.199  | 0.028  |
| TRCN000006:CBX5    | -0.216 | -0.358 | 0.771  | 1.548  |
| TRCN000001:CBX6    | -0.838 | -1.267 | 0.686  | 0.097  |
| TRCN000001:CBX6    | 0.435  | 0.289  | -1.105 | 1.457  |
| TRCN000001:CBX6    | -1.3   | -1.257 | -1.037 | -0.536 |
| TRCN000001:CBX6    | -0.769 | -0.569 | -0.909 | 1.053  |
| TRCN000001:CBX7    | 0.568  | 0.052  | 0.382  | 0.763  |
| TRCN000001:CBX7    | 0.495  | 0.266  | -0.223 | 0.605  |
| TRCN000001:CBX7    | 1.069  | 0.751  | 1.343  | 0.637  |
| TRCN000001:CBX7    | 1.47   | 1.032  | 0.732  | 0.75   |
| TRCN000002:CBX8    | 1.339  | 1.016  | 1.463  | 0.389  |
| TRCN000002:CBX8    | 0.532  | 0.339  | 0.777  | 1.574  |
| TRCN000002:CBX8    | -0.028 | -0.517 | -0.81  | -0.871 |
| TRCN000005:CD2BP2  | -0.647 | -0.601 | 0.975  | 0.984  |
| TRCN000005:CD2BP2  | -0.938 | -0.947 | 1.216  | 1.327  |
| TRCN000005:CD2BP2  | 0.475  | 0.813  | 1.398  | 1.543  |
| TRCN000007:CHAF1A  | 0.163  | 0.294  | 0.329  | 0.357  |
| TRCN000007:CHAF1A  | 0.611  | 0.467  | 0.66   | 0.689  |
| TRCN000007:CHAF1A  | 0.744  | 0.54   | 0.181  | 0.353  |
| TRCN000007:CHAF1A  | -0.044 | -0.214 | 0.865  | 0.941  |
| TRCN000007:CHAF1B  | 0.915  | 1.098  | 0.911  | 0.962  |
| TRCN000007:CHAF1B  | 1.342  | 1.248  | 0.672  | 0.688  |
| TRCN000007:CHAF1B  | 1.224  | 1.172  | 0.155  | 0.214  |
| TRCN000007:CHAF1B  | -1.048 | -1.406 | -0.747 | -0.722 |
| TRCN000002:CHD1    | 0.228  | 0.324  | 0.959  | 1.056  |
| TRCN000002:CHD1    | 0.364  | 0.355  | -0.781 | -0.715 |
| TRCN000002:CHD1    | -2.042 | -2.208 | 0.013  | 0.148  |
| TRCN000002:CHD1    | 0.206  | 0.274  | 1.634  | 1.841  |

|                   |        |        |        |        |
|-------------------|--------|--------|--------|--------|
| TRCN000002:CHD2   | 1.109  | 1.179  | 1.456  | 1.523  |
| TRCN000002:CHD2   | 0.734  | 0.544  | 1.027  | 1.121  |
| TRCN000002:CHD5   | -0.624 | -0.522 | -1.289 | -1.271 |
| TRCN000002:CHD5   | -0.31  | -0.241 | 1.058  | 1.127  |
| TRCN000002:CHD5   | 1.4    | 1.304  | -1.197 | -1.195 |
| TRCN000002:CHD5   | 1.082  | 0.888  | -0.981 | -0.929 |
| TRCN000001:CHD7   | -0.42  | -0.492 | -0.848 | -0.807 |
| TRCN000001:CHD7   | -0.111 | -0.103 | -0.93  | -0.884 |
| TRCN000001:CHD7   | 0.9    | 0.831  | -0.139 | -0.127 |
| TRCN000001:CHD7   | 0.745  | 0.837  | 0.88   | 1.125  |
| TRCN000001:CHD7   | 0.54   | 0.834  | 1.035  | 1.093  |
| TRCN000001:CHD8   | 0.029  | -0.165 | -1.217 | -1.21  |
| TRCN000001:CHD8   | -1.334 | -1.348 | -0.08  | -0.066 |
| TRCN000001:CHD8   | -1.776 | -1.873 | -0.072 | -0.06  |
| TRCN000014:CHMP2A | -0.079 | -0.195 | -0.239 | -0.279 |
| TRCN000014:CHMP2A | -0.19  | -0.336 | -1.071 | 0.632  |
| TRCN000014:CHMP2A | 0.007  | -0.043 | -0.629 | 0.743  |
| TRCN000012:CHMP2B | -2.471 | -2.436 | 0.526  | 0.796  |
| TRCN000013:CHMP2B | -0.688 | -0.121 | 0.06   | 0.219  |
| TRCN000013:CHMP2B | -1.594 | -1.612 | 0.61   | 0.664  |
| TRCN000013:CHMP2B | -0.744 | -0.784 | -0.792 | -0.632 |
| TRCN000014:CHMP4A | -0.306 | -0.31  | -0.532 | -0.511 |
| TRCN000014:CHMP4A | -0.434 | -0.49  | -0.831 | -0.775 |
| TRCN000014:CHMP4A | 0.754  | 0.581  | -1.165 | -1.037 |
| TRCN000014:CHMP4A | 1.004  | 0.919  | -0.453 | -0.423 |
| TRCN000015:CHMP4A | 0.53   | 0.307  | 0.337  | 0.692  |
| TRCN000015:CHMP6  | 0.974  | 1.191  | 1.604  | 1.931  |
| TRCN000015:CHMP6  | -0.645 | -0.636 | 0.025  | 0.884  |
| TRCN000001:CHRA1  | 0.985  | 0.832  | 1.9    | 1.931  |
| TRCN000001:CHRA1  | -1.571 | -1.677 | 1.003  | 1.22   |
| TRCN000001:CHRA1  | -2.7   | -2.481 | 0.982  | 1.254  |
| TRCN000001:CHRA1  | -1.052 | -0.931 | 0.339  | 0.353  |
| TRCN000001:CHRA1  | 0.362  | 0.137  | -0.676 | -0.542 |
| TRCN000001:CLOCK  | 0.158  | 0.219  | -0.484 | -0.198 |
| TRCN000001:CLOCK  | -1.044 | -0.891 | -0.085 | -0.045 |
| TRCN000001:CLOCK  | 0.546  | 0.497  | -1.469 | -1.04  |
| TRCN000001:CLOCK  | -0.401 | -0.436 | 0.956  | 1.156  |
| TRCN000003:COQ3   | 1.048  | 0.882  | 0.392  | 0.467  |
| TRCN000003:COQ3   | 0.63   | 0.643  | 0.633  | 0.639  |
| TRCN000002:DMAP1  | 0.136  | -0.667 | 0.938  | 1.057  |
| TRCN000002:DMAP1  | -0.567 | -0.933 | 0.06   | 0.409  |

|                     |        |        |        |        |
|---------------------|--------|--------|--------|--------|
| TRCN000002: DMAP1   | -1     | -1.127 | -0.524 | -0.419 |
| TRCN000003: EHMT1   | 0.339  | 0.411  | 0.535  | 0.66   |
| TRCN000003: EHMT1   | -0.081 | -0.164 | -1.565 | -1.548 |
| TRCN000003: EHMT1   | -0.193 | -0.278 | 1.308  | 1.333  |
| TRCN000003: EHMT1   | 1.345  | 1.028  | 0.276  | 0.393  |
| TRCN000003: EHMT1   | -0.121 | 0.147  | -1.103 | -1.02  |
| TRCN000011: EHMT2   | -0.866 | -0.604 | 1.348  | 1.348  |
| TRCN000011: EHMT2   | 0.482  | 0.452  | -1.592 | -1.589 |
| TRCN000011: EHMT2   | 1.941  | 2.336  | 0.349  | 0.606  |
| TRCN000007: EPC1    | -2.253 | -2.143 | 1.288  | 0.219  |
| TRCN000007: EPC1    | 0.287  | 0.266  | 0.217  | 1.13   |
| TRCN000007: EPC1    | -1.878 | -1.882 | -0.124 | 0.669  |
| TRCN000007: EPC1    | 1.005  | 0.877  | 0.358  | 1.479  |
| TRCN000007: EPC1    | 0.432  | 0.369  | -0.01  | 1.821  |
| TRCN000006: EPC2    | -0.676 | -0.341 | 1.25   | -0.761 |
| TRCN000006: EPC2    | 0.206  | 0.072  | 0.427  | 1.711  |
| TRCN000006: EPC2    | 1.08   | 0.868  | -0.969 | 0.42   |
| TRCN000006: EPC2    | -1.413 | -1.388 | -0.307 | 1.276  |
| TRCN000006: EPC2    | 0.243  | 0.594  | 1.295  | 1.111  |
| TRCN000000: EZH1    | -1.787 | -1.965 | -0.061 | 0.929  |
| TRCN000000: EZH1    | 1.398  | 1.56   | 0.687  | 0.914  |
| TRCN000000: EZH1    | 0.906  | 0.671  | -0.561 | 0.843  |
| TRCN000001: EZH2    | -0.598 | -0.556 | -1.548 | 1.157  |
| TRCN000001: EZH2    | -1.178 | -1.227 | -0.787 | -0.342 |
| TRCN000001: EZH2    | -0.567 | -0.586 | 1.585  | -0.197 |
| TRCN000004: EZH2    | 0.085  | 0.217  | 1.137  | -0.133 |
| TRCN000004: EZH2    | -0.383 | -0.332 | -0.072 | 1.226  |
| TRCN000004: EZH2    | -0.126 | -0.1   | -0.161 | -0.099 |
| TRCN000004: EZH2    | -0.032 | -0.027 | 1.115  | 1.015  |
| TRCN000006: FBXL19  | -0.706 | -0.667 | 0.306  | 0.813  |
| TRCN000006: FBXL19  | 0.426  | 0.378  | 0.526  | 0.725  |
| TRCN000006: FBXL19  | -1.101 | -1.11  | 1.576  | 1.697  |
| TRCN000006: FBXL19  | 0.572  | 0.585  | -0.486 | -0.401 |
| TRCN000000: FBXO11  | 1.132  | 1.041  | 1.67   | 0.446  |
| TRCN000000: FBXO11  | -2.714 | -2.665 | -0.672 | -0.381 |
| TRCN000000: FBXO11  | -0.662 | -0.536 | 0.307  | 0.709  |
| TRCN000001: GATAD2A | 0.404  | 0.348  | -0.584 | 1.204  |
| TRCN000001: GATAD2A | 0.489  | 0.27   | -1.421 | 0.507  |
| TRCN000001: GATAD2A | -1.858 | -1.892 | -0.676 | 0.511  |
| TRCN000001: GATAD2A | -1.143 | -0.951 | -1.225 | -0.113 |
| TRCN000001: GATAD2A | 0.526  | 0.576  | 0.041  | 0.94   |

|                    |        |        |        |        |
|--------------------|--------|--------|--------|--------|
| TRCN000001!GATAD2B | -1.059 | -1.208 | -0.958 | 0.094  |
| TRCN000001!GATAD2B | 0.312  | 0.478  | -1.404 | 0.168  |
| TRCN000001!GATAD2B | -0.342 | 0.221  | -1.373 | 0.767  |
| TRCN000001!GATAD2B | 0.204  | 0.233  | 0.497  | 1.891  |
| TRCN000000!HDAC1   | 0.954  | 0.913  | -0.147 | 1.102  |
| TRCN000000!HDAC1   | 0.37   | 0.571  | -0.66  | -0.856 |
| TRCN000000!HDAC1   | 0.367  | 0.37   | 1.189  | -0.531 |
| TRCN000019!HDAC1   | -1.682 | -1.63  | -0.342 | 1.474  |
| TRCN000000!HDAC10  | 3.179  | 3.144  | -0.836 | -1.257 |
| TRCN000000!HDAC10  | -0.559 | -0.472 | -0.782 | -0.176 |
| TRCN000000!HDAC10  | -0.279 | -0.236 | -1.076 | -0.026 |
| TRCN000000!HDAC10  | 0.564  | 0.431  | 0.075  | 0.119  |
| TRCN000019!HDAC10  | 0.219  | 0.332  | -1.303 | 1.12   |
| TRCN000019!HDAC10  | -0.2   | 0.028  | -0.891 | -0.76  |
| TRCN000019!HDAC10  | -1.086 | -1.036 | 1.46   | -0.158 |
| TRCN000001!HDAC11  | 0.774  | 0.571  | -0.874 | 0.383  |
| TRCN000001!HDAC11  | 1.369  | 1.203  | -0.852 | 0.7    |
| TRCN000001!HDAC11  | 0.909  | 0.922  | -0.738 | 1.117  |
| TRCN000019!HDAC11  | -1.032 | -1.111 | 1.291  | -0.827 |
| TRCN000019!HDAC11  | -0.239 | -0.152 | 0.738  | 0.599  |
| TRCN000000!HDAC2   | 0.529  | 0.477  | -0.411 | -0.391 |
| TRCN000000!HDAC2   | -0.084 | -0.052 | 0.141  | 0.682  |
| TRCN000000!HDAC2   | 0.147  | 0.321  | -0.441 | 0.626  |
| TRCN000019!HDAC2   | -0.235 | -0.302 | -0.322 | 2.072  |
| TRCN000019!HDAC2   | 1.223  | 1.109  | -0.962 | -1.071 |
| TRCN000019!HDAC2   | -0.077 | -0.088 | 1.512  | 1.758  |
| TRCN000019!HDAC2   | -0.554 | -0.818 | 1.212  | 1.453  |
| TRCN000000!HDAC3   | -0.497 | -0.275 | 1.854  | 1.931  |
| TRCN000000!HDAC3   | 0.935  | 0.651  | 0.599  | 0.608  |
| TRCN000000!HDAC3   | -0.438 | -0.887 | 0.278  | 0.466  |
| TRCN000000!HDAC3   | -1.12  | -1.299 | 0.195  | 0.35   |
| TRCN000019!HDAC3   | 0.996  | 1.114  | 1.458  | 1.611  |
| TRCN000019!HDAC3   | -1.581 | -1.463 | 0.793  | 0.815  |
| TRCN000019!HDAC3   | -1.108 | -1.178 | 0.211  | 0.379  |
| TRCN000019!HDAC3   | -1.009 | -1.129 | 0.241  | 0.455  |
| TRCN000019!HDAC3   | 0.684  | 0.577  | -0.235 | -0.174 |
| TRCN000000!HDAC4   | -0.574 | -0.388 | 0.551  | 0.633  |
| TRCN000000!HDAC4   | 2.234  | 1.855  | -0.721 | -0.68  |
| TRCN000000!HDAC4   | 1.338  | 1.278  | 0.364  | 0.48   |
| TRCN000000!HDAC4   | 0.375  | 0.65   | -0.316 | -0.179 |
| TRCN000000!HDAC5   | 0.279  | 0.157  | 2.004  | 2.224  |

|                   |        |        |        |        |
|-------------------|--------|--------|--------|--------|
| TRCN000000 HDAC5  | 0.47   | 0.412  | -1.205 | -1.203 |
| TRCN000000 HDAC5  | 0.649  | 0.525  | -0.66  | -0.655 |
| TRCN000000 HDAC5  | -0.012 | -0.002 | -0.435 | -0.366 |
| TRCN000000 HDAC6  | 0.995  | 1.179  | -0.715 | -0.626 |
| TRCN000000 HDAC6  | -0.576 | -0.662 | -0.389 | -0.347 |
| TRCN000000 HDAC6  | 0.41   | 0.313  | -0.711 | -0.629 |
| TRCN000000 HDAC6  | -0.92  | -0.623 | -0.613 | -0.581 |
| TRCN000000 HDAC6  | 0.523  | 0.751  | -1.14  | -1.103 |
| TRCN000000 HDAC7  | -0.573 | -1.035 | 0.445  | 0.581  |
| TRCN000000 HDAC7  | -0.939 | -1.038 | -0.657 | -0.606 |
| TRCN000000 HDAC7  | 0.576  | 0.604  | 0.651  | 0.824  |
| TRCN000000 HDAC7  | -1.587 | -1.236 | -0.349 | -0.273 |
| TRCN000019 HDAC7  | 1.133  | 1.388  | -0.721 | -0.575 |
| TRCN000019 HDAC7  | 0.04   | 0.083  | 0.336  | 0.387  |
| TRCN000019 HDAC7  | 0.887  | 0.842  | 0.221  | 0.276  |
| TRCN000019 HDAC7  | 0.201  | 0.425  | 0.297  | 0.485  |
| TRCN000000 HDAC8  | 0.455  | 0.624  | 0.384  | 0.615  |
| TRCN000000 HDAC8  | 0.716  | 0.865  | 1.063  | 1.217  |
| TRCN000000 HDAC8  | -0.082 | -0.171 | 0.723  | 0.983  |
| TRCN000000 HDAC9  | 0.913  | 0.923  | -0.197 | -0.156 |
| TRCN000000 HDAC9  | -0.342 | -0.166 | -0.534 | -0.465 |
| TRCN000000 HDAC9  | 0.011  | -0.24  | 2.165  | 2.271  |
| TRCN000000 HDAC9  | 1.426  | 1.213  | -1.316 | -1.31  |
| TRCN000000 HDAC9  | 0.767  | 0.624  | 0.15   | 0.195  |
| TRCN000006 HIF1AN | -0.605 | -0.468 | -0.21  | -0.11  |
| TRCN000006 HIF1AN | 0.513  | 0.551  | -0.908 | -0.794 |
| TRCN000006 HIF1AN | -0.499 | -0.523 | 0.637  | 1.009  |
| TRCN000000 HIF3A  | -0.224 | -0.671 | 0.631  | 0.768  |
| TRCN000000 HIF3A  | 0.879  | 0.968  | 0.593  | 0.704  |
| TRCN000000 HIF3A  | -0.058 | -0.241 | 0.952  | 0.997  |
| TRCN000000 HIF3A  | -0.152 | -0.192 | 1.468  | 1.6    |
| TRCN000001 HIF3A  | -0.126 | -0.111 | -1.042 | -0.981 |
| TRCN000002 HIRA   | -0.187 | -0.051 | 1.82   | 1.934  |
| TRCN000002 HIRA   | 0.637  | 1.254  | -0.748 | -0.665 |
| TRCN000002 HIRA   | 0.098  | 0.281  | 0.187  | 0.211  |
| TRCN000002 HIRA   | 0.439  | 0.458  | 0.858  | 0.907  |
| TRCN000001 HMG20B | 0.406  | 0.509  | -0.213 | -0.071 |
| TRCN000001 HMG20B | -0.118 | -0.098 | 0.653  | 0.718  |
| TRCN000001 HMG20B | 0.851  | 0.881  | -0.473 | -0.374 |
| TRCN000001 HMG20B | 0.699  | 0.68   | -0.754 | -0.567 |
| TRCN000001 HMGB1  | -0.162 | -0.562 | -0.548 | -0.371 |



|                  |        |        |        |        |
|------------------|--------|--------|--------|--------|
| TRCN000001:HMGB1 | -0.223 | -0.199 | -1.16  | -1.089 |
| TRCN000001:HMGB1 | -1.409 | -1.482 | -1.439 | -1.418 |
| TRCN000001:HMGB1 | 0.417  | 0.249  | -0.62  | -0.467 |
| TRCN000001:HMGB2 | -0.685 | -0.897 | -0.939 | -0.914 |
| TRCN000001:HMGB2 | 0.668  | 0.758  | 1.715  | 1.766  |
| TRCN000001:HMGB2 | 0.099  | 0.352  | 0.067  | 0.375  |
| TRCN000001:HMGB2 | 1.057  | 0.984  | 0.191  | 0.229  |
| TRCN000001:HMGB2 | 0.949  | 0.93   | 0.728  | 0.837  |
| TRCN000001:HMGB3 | -2.66  | -2.449 | 0.601  | 0.609  |
| TRCN000001:HMGB3 | 0.083  | 0.108  | -0.419 | 0.605  |
| TRCN000001:HMGB3 | -0.14  | -0.331 | -0.931 | 2.306  |
| TRCN000001:HMGB3 | 0.309  | 0.501  | 1.231  | 0.824  |
| TRCN000001:HMGN1 | -0.774 | -0.832 | -1.189 | 0.066  |
| TRCN000001:HMGN1 | 0.051  | 0.001  | -1.375 | -0.363 |
| TRCN000001:HMGN2 | 0.041  | 0.051  | 1.21   | 1.069  |
| TRCN000001:HMGN2 | 1.101  | 1.165  | -1.188 | 1.398  |
| TRCN000001:HMGN2 | 0.597  | 0.607  | -0.216 | 0.708  |
| TRCN000001:HMGN3 | 1.978  | 1.884  | -0.882 | 1.045  |
| TRCN000001:HMGN3 | 0.261  | 0.602  | 0.727  | 1.204  |
| TRCN000001:HMGN3 | 1.235  | 1.24   | -0.408 | 1.313  |
| TRCN000011:HMGN4 | 0.514  | 0.45   | -0.479 | 0.623  |
| TRCN000011:HMGN4 | 1.568  | 1.743  | -0.124 | 0.562  |
| TRCN000011:HMGN4 | 0.646  | 0.714  | -0.045 | 1.406  |
| TRCN000001:HMGN5 | -0.845 | -0.303 | 0.089  | 1.114  |
| TRCN000001:HMGN5 | -0.597 | 0.213  | 1.579  | 1.406  |
| TRCN000001:HMGN5 | -0.586 | 0.164  | 1.506  | 1.05   |
| TRCN000002:HMGB4 | -0.451 | -0.461 | -1.129 | -1.076 |
| TRCN000002:HMGB4 | 0.346  | 0.428  | -1.576 | -1.574 |
| TRCN000002:HMGB4 | -0.394 | -0.209 | 0.297  | 0.319  |
| TRCN000002:HMGB4 | 1.056  | 1.367  | 1.098  | 1.303  |
| TRCN000006:IL4I1 | -0.194 | -0.358 | 1.438  | 0.459  |
| TRCN000013:JMJD4 | 0.826  | 0.647  | 0.76   | 0.076  |
| TRCN000013:JMJD4 | -0.566 | -0.681 | 1.182  | 1.1    |
| TRCN000013:JMJD4 | 0.069  | 0.169  | -0.329 | -0.001 |
| TRCN000013:JMJD4 | 1.379  | 0.486  | -0.933 | 1.278  |
| TRCN000012:JMJD5 | -0.061 | -0.158 | 1.103  | 1.052  |
| TRCN000013:JMJD5 | -0.41  | -0.362 | -1.402 | 1.548  |
| TRCN000013:JMJD5 | -0.189 | -0.407 | -1.314 | 1.268  |
| TRCN000006:JMJD6 | -0.486 | -0.908 | -0.214 | -0.091 |
| TRCN000006:JMJD6 | -0.911 | -0.874 | 0.827  | 0.877  |
| TRCN000006:JMJD6 | -0.141 | 0.086  | -0.139 | -0.035 |

|                        |        |        |        |        |
|------------------------|--------|--------|--------|--------|
| TRCN000006:JMJD6       | -1.019 | -0.99  | -0.544 | -0.463 |
| TRCN000000:JMJD7-PLA2G | -0.095 | 1.903  | -0.34  | 0.74   |
| TRCN000016:JMJD8       | 0.171  | 0.146  | 0.953  | 1.124  |
| TRCN000016:JMJD8       | 0.623  | 0.615  | -0.729 | -0.439 |
| TRCN000017:JMJD8       | -1.836 | -1.809 | -0.147 | 0.016  |
| TRCN000017:JMJD8       | 2.628  | 2.909  | -0.044 | 0.043  |
| TRCN000017:JMJD8       | 0.883  | 0.775  | 1.767  | 1.834  |
| TRCN000001:KAT2B       | 0.404  | 0.346  | 0.882  | 1.246  |
| TRCN000001:KAT2B       | 0.702  | 0.773  | 0.403  | 0.593  |
| TRCN000001:KAT2B       | 0.057  | -0.014 | -0.225 | 0.199  |
| TRCN000004:KDM1        | -1.053 | -1.124 | -0.734 | -0.631 |
| TRCN000004:KDM1        | -0.409 | -0.167 | 0.91   | 1.085  |
| TRCN000004:KDM1        | 0.529  | 1.519  | -0.016 | 0.087  |
| TRCN000004:KDM1        | 0.787  | 0.574  | 0.771  | 0.789  |
| TRCN000011:KDM2B       | 0.313  | 0.298  | -0.591 | 1.062  |
| TRCN000001:KDM4B       | 1.192  | 0.839  | -0.174 | 0.503  |
| TRCN000001:KDM4B       | 0.008  | -0.225 | 1.026  | 1.591  |
| TRCN000002:KDM4C       | -0.651 | -0.756 | -1.15  | 0.796  |
| TRCN000014:KDM4D       | 1.086  | 0.943  | -1.083 | -1.118 |
| TRCN000014:KDM4D       | -2.318 | -2.269 | 0.517  | -0.024 |
| TRCN000014:KDM4D       | -0.432 | -0.445 | -1.27  | 0.671  |
| TRCN000001:KDM5A       | 0.768  | 0.931  | 0.043  | 0.056  |
| TRCN000001:KDM5A       | -0.4   | -0.465 | 0.584  | 0.768  |
| TRCN000001:KDM5A       | 1.236  | 1.125  | 0.488  | 0.636  |
| TRCN000002:KDM5D       | -2.383 | -2.39  | 0.92   | 1.193  |
| TRCN000002:KDM5D       | 0.441  | 0.389  | 0.832  | 0.871  |
| TRCN000002:KDM5D       | -0.198 | -0.201 | -0.457 | -0.184 |
| TRCN000004:KLHDC9      | 0.772  | 0.722  | 2.216  | -0.131 |
| TRCN000004:KLHDC9      | -0.771 | -1.042 | 0.831  | 1.794  |
| TRCN000004:MAOB        | 0.483  | 0.853  | 0.848  | 0.046  |
| TRCN000004:MAOB        | 1.814  | 1.832  | -0.367 | 0.779  |
| TRCN000004:MAOB        | -2.276 | -2.198 | -0.672 | 1.672  |
| TRCN000001:MBD4        | 2.154  | 2.115  | -1.617 | -1.25  |
| TRCN000001:MBD4        | -0.327 | -0.379 | 1.977  | 2      |
| TRCN000001:MBD4        | -0.005 | 0.111  | -1.211 | -0.936 |
| TRCN000001:MBD4        | 0.259  | 0.354  | -1.409 | -1.033 |
| TRCN000001:MBD4        | -1.269 | -1.266 | 0.853  | 1.252  |
| TRCN000003:MBD6        | 1.186  | 1.191  | -1.554 | -1.191 |
| TRCN000003:MBD6        | 1.231  | 1.173  | -0.178 | 0.174  |
| TRCN000003:MBD6        | -0.633 | -0.503 | 1.369  | 1.6    |
| TRCN000003:MBD6        | 1.471  | 1.734  | -0.101 | -0.016 |

|                    |        |        |        |        |
|--------------------|--------|--------|--------|--------|
| TRCN000012:METTL13 | 0.321  | 0.276  | 0.078  | -0.11  |
| TRCN000014:METTL13 | -0.567 | -0.42  | -1.219 | 0.453  |
| TRCN000011:MINA    | -0.636 | -0.593 | -0.579 | 0.377  |
| TRCN000011:MINA    | 0.302  | 0.131  | 0.426  | 0.998  |
| TRCN000012:MINA    | -0.239 | -0.174 | 0.851  | 1.06   |
| TRCN000012:MINA    | 0.128  | -0.207 | -0.873 | -0.699 |
| TRCN000013:MINA    | 0.86   | 0.489  | 1.047  | 1.85   |
| TRCN000013:MINA    | 0.309  | 0.203  | 1.232  | 1.57   |
| TRCN000000:MLL     | -0.77  | -0.955 | 0.432  | 0.635  |
| TRCN000001:MLL2    | 0.026  | -0.026 | 1.315  | 1.665  |
| TRCN000001:MLL2    | 0.165  | 0.169  | -0.24  | -0.068 |
| TRCN000001:MLL2    | -0.491 | -0.397 | 0.916  | 0.947  |
| TRCN000000:MLL3    | -0.134 | -0.284 | 0.657  | 1.159  |
| TRCN000000:MLL3    | -0.497 | -0.601 | 0.768  | 1.276  |
| TRCN000000:MLL3    | -1.022 | -0.877 | 1.123  | 1.65   |
| TRCN000000:MLL3    | 1.237  | 1.006  | -0.23  | -0.069 |
| TRCN000015:MLL5    | -2.396 | -2.423 | 1.303  | 1.662  |
| TRCN000015:MLL5    | -1.68  | -1.407 | 0.546  | 0.858  |
| TRCN000015:MLL5    | 0.749  | 0.694  | 0.621  | 1.276  |
| TRCN000001:MORF4   | -0.137 | -0.352 | 0.546  | 0.805  |
| TRCN000001:MORF4   | 0.213  | -0.063 | -0.33  | 0.162  |
| TRCN000001:MORF4   | -0.591 | -0.458 | 1.206  | 1.308  |
| TRCN000010:MORF4L1 | 1.417  | 1.465  | 2.388  | 2.781  |
| TRCN000010:MORF4L1 | -1.466 | -1.568 | 1.447  | 1.535  |
| TRCN000010:MORF4L1 | -0.824 | -0.872 | 0.268  | 0.585  |
| TRCN000010:MORF4L2 | 0.067  | 0.065  | 1.624  | 2.284  |
| TRCN000010:MORF4L2 | -0.483 | -0.418 | 0.505  | 0.569  |
| TRCN000010:MORF4L2 | 0.215  | 0.236  | -0.119 | -0.012 |
| TRCN000002:MSL3    | 0.175  | 0.018  | 0.422  | 0.713  |
| TRCN000002:MSL3    | -1.068 | -1.063 | 0.347  | 0.757  |
| TRCN000001:MYST3   | -0.432 | -0.669 | -0.851 | -0.67  |
| TRCN000001:MYST3   | 0.975  | 1.007  | 1.649  | 1.75   |
| TRCN000014:NAP1L1  | 0.337  | -0.107 | 1.201  | 1.486  |
| TRCN000014:NAP1L2  | 1.046  | 0.761  | 0.138  | 0.454  |
| TRCN000014:NAP1L2  | 1.653  | 0.992  | 2.026  | 2.232  |
| TRCN000014:NAP1L2  | -0.002 | 0.104  | 0.069  | 0.116  |
| TRCN000014:NAP1L3  | 0.274  | 0.284  | -0.199 | -0.149 |
| TRCN000014:NAP1L3  | -0.879 | -0.903 | 0.863  | 1.465  |
| TRCN000014:NAP1L5  | 0.131  | 0.21   | 1.02   | 1.685  |
| TRCN000014:NAP1L5  | -0.265 | -0.526 | -0.465 | -0.295 |
| TRCN000014:NAP1L5  | -0.89  | -0.876 | -0.348 | -0.113 |

|                   |        |        |        |        |
|-------------------|--------|--------|--------|--------|
| TRCN000011!NASP   | 1.616  | 1.212  | -0.813 | -0.701 |
| TRCN000011!NASP   | -0.41  | -0.372 | -0.694 | -0.556 |
| TRCN000011!NCAPD2 | 1.367  | 1.625  | 0.974  | 0.976  |
| TRCN000011!NCAPD2 | 2.156  | 1.857  | 0.289  | 0.319  |
| TRCN000011!NCAPD2 | -0.529 | -0.606 | 1.036  | 1.226  |
| TRCN000011!NCAPD2 | 0.416  | 0.457  | 0.266  | 0.471  |
| TRCN000011!NCAPD2 | 0.646  | 0.847  | 1.32   | 1.409  |
| TRCN000006!NCAPD3 | 0.761  | 0.814  | 0.895  | -0.073 |
| TRCN000006!NCAPD3 | -1.62  | -1.43  | -0.482 | 1.669  |
| TRCN000006!NCAPD3 | -0.421 | -0.39  | -0.179 | 0.71   |
| TRCN000006!NCAPD3 | 0.763  | 0.403  | -1.176 | -0.833 |
| TRCN000012!NIPBL  | 1.668  | 1.301  | 0.386  | 0.75   |
| TRCN000014!NIPBL  | -0.617 | 1.201  | -0.328 | 1.244  |
| TRCN000014!NIPBL  | 0.474  | -0.665 | -1.05  | -1.104 |
| TRCN000015!NIPBL  | -0.297 | 1.165  | 0.285  | 0.873  |
| TRCN000000!None   | -0.013 | -0.137 | -0.017 | -0.012 |
| TRCN000000!None   | 1.569  | 1.49   | 0.362  | 0.59   |
| TRCN000000!None   | -0.823 | -0.734 | 1.594  | 1.637  |
| TRCN000005!None   | -0.476 | -0.355 | -1.094 | -0.444 |
| TRCN000005!None   | -0.676 | -0.653 | -1.094 | -0.401 |
| TRCN000005!None   | -0.971 | -1.114 | -0.166 | 1.489  |
| TRCN000015!None   | 0.929  | 0.736  | 1.536  | 1.448  |
| TRCN000015!None   | -0.467 | -0.333 | -0.815 | 0.696  |
| TRCN000006!NSD1   | 2.126  | 0.657  | -0.201 | 1.015  |
| TRCN000004!PAOX   | 0.296  | 0.156  | 0.646  | -0.363 |
| TRCN000004!PAOX   | -1.336 | -1.43  | 1.702  | 1.238  |
| TRCN000004!PAOX   | -0.305 | 0.861  | 0.603  | 1.222  |
| TRCN000001!PBRM1  | 0.716  | -0.116 | -0.505 | -0.595 |
| TRCN000002!PDS5B  | -0.672 | -0.486 | -0.753 | -0.716 |
| TRCN000002!PDS5B  | 1.932  | 1.087  | 0.092  | 0.18   |
| TRCN000002!PDS5B  | 0.633  | 0.76   | -0.163 | 0.007  |
| TRCN000002!PDS5B  | 0.031  | -0.04  | -0.167 | 0.144  |
| TRCN000002!PDS5B  | 1.198  | 0.994  | 0.433  | 0.444  |
| TRCN000015!PHC1   | -1.243 | -1.271 | -0.264 | 0.726  |
| TRCN000015!PHC1   | -3.1   | -1.896 | -0.782 | 0.277  |
| TRCN000013!PHC3   | 0.56   | 0.625  | -0.085 | 1.012  |
| TRCN000013!PHC3   | -0.842 | -0.719 | -0.237 | 0.177  |
| TRCN000014!PHC3   | -2.45  | -2.507 | 0.939  | 0.402  |
| TRCN000002!PHF11  | -0.534 | -0.495 | -1.061 | -0.59  |
| TRCN000001!PHF16  | -1.21  | -1.175 | -0.538 | -0.379 |
| TRCN000001!PHF16  | -0.598 | -0.549 | -0.316 | -0.005 |

|                    |        |        |        |        |
|--------------------|--------|--------|--------|--------|
| TRCN000004! PPOX   | -0.478 | 0.106  | -0.512 | 1.278  |
| TRCN000001! PRDM1  | 0.397  | -0.628 | -1.263 | 1.547  |
| TRCN000001! PRDM1  | 0.333  | -0.455 | -0.228 | 0.551  |
| TRCN000001! PRDM1  | -0.572 | 0.762  | -0.296 | -1.064 |
| TRCN000001! PRDM10 | 1.533  | 1.484  | 0.578  | 1.035  |
| TRCN000001! PRDM10 | 1.456  | 0.208  | -0.463 | 0.042  |
| TRCN000001! PRDM12 | -0.737 | 0.222  | -0.363 | 0.831  |
| TRCN000001! PRDM14 | 0.151  | -0.813 | -0.471 | 1.504  |
| TRCN000001! PRDM14 | 1.213  | -0.304 | -1.283 | 0.813  |
| TRCN000002! PRDM16 | -1.103 | -0.522 | 0.283  | 1.449  |
| TRCN000001! PRDM2  | 1.171  | -0.462 | 0.258  | 0.443  |
| TRCN000001! PRDM2  | 1.357  | -0.343 | -1.333 | 1.045  |
| TRCN000001! PRDM2  | 0.825  | -0.33  | -0.226 | 1.692  |
| TRCN000001! PRDM4  | -0.085 | 1.364  | 0.755  | 0.591  |
| TRCN000001! PRDM4  | 0.38   | 0.397  | -0.104 | -0.079 |
| TRCN000001! PRDM4  | -0.103 | 0.197  | -0.053 | 0.092  |
| TRCN000001! PRDM4  | -0.119 | -0.2   | -0.884 | -0.876 |
| TRCN000001! PRDM4  | 0.878  | 0.519  | 2.273  | 2.338  |
| TRCN000001! PRDM5  | 1.036  | 0.904  | 0.226  | 0.232  |
| TRCN000001! PRDM5  | -0.816 | -0.075 | -0.113 | -0.065 |
| TRCN000001! PRDM5  | 1.077  | 0.833  | 0.087  | 0.298  |
| TRCN000001! PRDM7  | 1.61   | 1.349  | 2.222  | 2.273  |
| TRCN000001! PRDM7  | -0.689 | -0.445 | 0.486  | 0.5    |
| TRCN000001! PRDM8  | 0.006  | 0.48   | 1.837  | 2.215  |
| TRCN000001! PRDM8  | -0.463 | -0.147 | -0.04  | 0.039  |
| TRCN000001! PRDM8  | -2.775 | -2.823 | -0.998 | -0.976 |
| TRCN000001! PRDM8  | 1.033  | 1.256  | 0.67   | 0.913  |
| TRCN000001! PRDM9  | -1.768 | -1.534 | 0.843  | 0.979  |
| TRCN000003! PRMT1  | 1.52   | 1.427  | -1.229 | -0.063 |
| TRCN000003! PRMT1  | 1.58   | 1.326  | -0.116 | 1.573  |
| TRCN000003! PRMT1  | -2.063 | -2.033 | -0.538 | 2.052  |
| TRCN000003! PRMT2  | -0.501 | -0.396 | 0.549  | 0.629  |
| TRCN000003! PRMT2  | 1.144  | 0.813  | 0.753  | 0.782  |
| TRCN000003! PRMT2  | -0.48  | -0.258 | 1.039  | 1.159  |
| TRCN000003! PRMT3  | 1.289  | 1.137  | -1.018 | -0.956 |
| TRCN000003! PRMT3  | 0.444  | 0.428  | -0.889 | -0.887 |
| TRCN000010! PRMT5  | 0.488  | -0.042 | -0.765 | -0.752 |
| TRCN000010! PRMT5  | -0.158 | 0.113  | 1.882  | 1.901  |
| TRCN000010! PRMT5  | 0.683  | 0.422  | 1.435  | 1.448  |
| TRCN000010! PRMT5  | -1.823 | -1.762 | -0.232 | -0.1   |
| TRCN000003! PRMT6  | 0.984  | 1.275  | 1.897  | 2.014  |

|                   |        |        |        |        |
|-------------------|--------|--------|--------|--------|
| TRCN000003:PRMT6  | -0.16  | -0.021 | -1.051 | -1.031 |
| TRCN000003:PRMT6  | 1.738  | 1.485  | 1.063  | 1.088  |
| TRCN000003:PRMT7  | 0.024  | 0.156  | 1.567  | 1.763  |
| TRCN000003:PRMT7  | -1.846 | -1.977 | 0.798  | 0.952  |
| TRCN000003:PRMT7  | -0.395 | -0.719 | -0.847 | -0.812 |
| TRCN000003:PRMT8  | -3.101 | -3.179 | 0.523  | 0.555  |
| TRCN000003:PRMT8  | 1.528  | 1.553  | 0.385  | 0.387  |
| TRCN000003:PRMT8  | 0.883  | 0.901  | -0.361 | -0.345 |
| TRCN000003:PRMT8  | 0.055  | -0.108 | -0.698 | -0.628 |
| TRCN000011:RBBP4  | 0.822  | 1.028  | 0.898  | 1.05   |
| TRCN000011:RBBP4  | 0.268  | 0.498  | 0.493  | 0.689  |
| TRCN000011:RBBP4  | 0.166  | 0.375  | -0.536 | -0.417 |
| TRCN000011:RBBP4  | -0.2   | -0.297 | -0.161 | -0.144 |
| TRCN000003:RBBP7  | 0      | -0.195 | 1.25   | 1.502  |
| TRCN000003:RBBP7  | -0.525 | -0.108 | -0.933 | -0.841 |
| TRCN000003:RBBP7  | 1.445  | 1.321  | -0.097 | -0.086 |
| TRCN000015:RCC1   | 0.642  | 0.982  | 1.518  | 1.562  |
| TRCN000015:RCC1   | 0.932  | 0.887  | -0.32  | -0.298 |
| TRCN000015:RCC1   | 0.309  | 0.574  | -0.011 | 0.085  |
| TRCN000015:RCC1   | -0.58  | -0.683 | -0.631 | -0.626 |
| TRCN000002:SAP18  | -0.694 | -0.388 | -0.743 | -0.724 |
| TRCN000002:SAP18  | 0.177  | 0.366  | 0.727  | 0.828  |
| TRCN000002:SAP18  | 0.351  | 0.867  | 0.047  | 0.05   |
| TRCN000002:SAP18  | 0.783  | 0.645  | 1.423  | 1.454  |
| TRCN000002:SAP30  | 0.233  | 0.444  | -0.667 | -0.651 |
| TRCN000002:SAP30  | 0.507  | 0.373  | 1.461  | 1.487  |
| TRCN000002:SAP30  | -1.148 | -1.068 | 0.689  | 1.01   |
| TRCN000006:SET    | -0.272 | -0.218 | 1.143  | 1.227  |
| TRCN000001:SETBP1 | -0.45  | -0.719 | -1.281 | -0.327 |
| TRCN000001:SETBP1 | -0.553 | -0.158 | 0.849  | 0.971  |
| TRCN000015:SETD1A | 0.617  | 0.536  | -0.753 | 1.254  |
| TRCN000015:SETD1A | -0.196 | 0.019  | 0.475  | 0.525  |
| TRCN000015:SETD1A | 1.231  | 0.974  | 0.615  | 1.253  |
| TRCN000000:SETD2  | -0.785 | -0.896 | -1.041 | 1.218  |
| TRCN000000:SETD2  | 0.443  | 0.507  | -0.995 | -0.518 |
| TRCN000000:SETD2  | 0.863  | 0.838  | 0.121  | 0.282  |
| TRCN000012:SETD3  | 0.844  | 1.076  | -1.047 | 0.002  |
| TRCN000012:SETD3  | 0.52   | 0.586  | 1.573  | 1.54   |
| TRCN000013:SETD3  | 1.122  | 0.916  | -0.28  | -0.079 |
| TRCN000014:SETD3  | -0.415 | -0.236 | 0.452  | 1.53   |
| TRCN000007:SETD7  | 1.229  | 0.985  | -1.283 | -1.029 |

|                    |        |        |        |        |
|--------------------|--------|--------|--------|--------|
| TRCN000012!SETD8   | 0.526  | 0.746  | -0.678 | 1.35   |
| TRCN000013!SETD8   | -1.071 | -1.253 | 0.126  | -0.609 |
| TRCN000002!SIN3A   | 1.296  | 1.234  | 1.263  | 0.929  |
| TRCN000002!SIN3A   | -0.57  | -0.726 | -0.017 | 1.24   |
| TRCN000002!SIN3A   | -1.213 | -1.24  | 0.506  | 2.177  |
| TRCN000010!SIN3B   | 1.79   | 1.703  | -0.298 | -0.71  |
| TRCN000010!SIN3B   | 0.482  | 0.252  | -0.62  | 0.394  |
| TRCN000010!SIN3B   | 0.564  | 0.537  | 0.953  | 1.303  |
| TRCN000010!SIN3B   | -1.372 | -1.403 | 1.362  | 1.088  |
| TRCN000001!SIRT1   | -0.185 | -0.123 | -0.145 | -0.675 |
| TRCN000001!SIRT1   | 1.424  | 1.432  | -0.859 | -1.107 |
| TRCN000001!SIRT1   | 0.074  | -0.131 | -0.324 | -0.062 |
| TRCN000001!SIRT1   | -1.09  | -1.164 | 1.499  | 0.603  |
| TRCN000001!SIRT2   | 0.101  | 0.181  | 0.817  | 0.708  |
| TRCN000001!SIRT2   | 2.26   | 2.123  | -0.353 | 0.562  |
| TRCN000004!SIRT2   | -0.43  | -0.446 | -1.374 | 1.813  |
| TRCN000004!SIRT2   | 2.158  | 2.214  | 1.56   | 0.206  |
| TRCN000004!SIRT2   | -0.184 | -0.096 | -0.197 | 1.958  |
| TRCN000004!SIRT2   | -0.887 | -1.103 | -0.008 | -0.03  |
| TRCN000001!SIRT4   | 0.806  | 0.795  | -0.07  | 1.421  |
| TRCN000001!SIRT4   | 0.658  | 0.757  | -0.57  | -0.881 |
| TRCN000001!SIRT5   | -0.238 | -0.116 | -0.171 | 1.998  |
| TRCN000001!SIRT5   | -0.053 | -0.108 | -0.802 | -0.559 |
| TRCN000001!SIRT5   | 1.112  | 1.058  | -1.066 | -0.528 |
| TRCN000001!SIRT5   | -0.068 | -0.542 | -0.006 | 0.042  |
| TRCN000005!SIRT6   | -1.932 | -2.222 | -1.031 | 0.308  |
| TRCN000005!SIRT6   | 0.767  | 0.581  | 0.927  | 0.594  |
| TRCN000005!SIRT6   | -0.142 | 0.299  | -0.524 | 0.23   |
| TRCN000002!SIRT7   | 0.359  | 0.409  | -0.4   | 0.365  |
| TRCN000002!SIRT7   | -1.746 | -1.67  | -0.024 | 0.602  |
| TRCN000001!SMARCA4 | 0.963  | 1.046  | -0.3   | -0.072 |
| TRCN000001!SMARCA4 | -0.094 | -0.244 | -1.533 | -1.183 |
| TRCN000001!SMARCA4 | -0.55  | -0.769 | -0.382 | -0.287 |
| TRCN000001!SMARCB1 | 0.043  | 0.258  | -0.378 | 1.869  |
| TRCN000001!SMARCB1 | -1.403 | -1.44  | -0.178 | 1.633  |
| TRCN000003!SMARCB1 | 0.023  | 0.138  | -0.458 | 1.127  |
| TRCN000003!SMARCB1 | -0.531 | -0.707 | 0.74   | 1.04   |
| TRCN000001!SMARCC2 | -1.972 | -1.789 | -0.31  | 0.097  |
| TRCN000001!SMARCC2 | -0.309 | -0.335 | 0.358  | 1.047  |
| TRCN000001!SMARCC2 | 0.155  | 0.352  | 0.276  | 0.757  |
| TRCN000015!SMARCD1 | -0.59  | -0.629 | -0.964 | 0.029  |

|                     |        |        |        |        |
|---------------------|--------|--------|--------|--------|
| TRCN000015: SMARCD1 | 0.621  | 0.498  | -0.622 | 2.25   |
| TRCN000002: SMARCD2 | 0.986  | 1.25   | 0.002  | 1.507  |
| TRCN000002: SMARCD2 | -0.54  | -0.456 | -0.573 | 1.022  |
| TRCN000002: SMARCD2 | -2.209 | -2.474 | 1.072  | 0.951  |
| TRCN000006: SMC1A   | 0.592  | 0.705  | -0.732 | 0.178  |
| TRCN000006: SMC1A   | 0.196  | -0.409 | -0.24  | 0.796  |
| TRCN000006: SMC1A   | 1.02   | 1.227  | 0.043  | -0.132 |
| TRCN000015: SMC1B   | 0.139  | 0.159  | 1.977  | 0.94   |
| TRCN000015: SMC1B   | 0.554  | 0.486  | -1.077 | 0.18   |
| TRCN000015: SMC1B   | -1.523 | -1.678 | 0.785  | 0.174  |
| TRCN000006: SMC2    | -1.877 | -1.748 | 0.917  | 0.949  |
| TRCN000006: SMC2    | 0.757  | 0.686  | -0.313 | -0.221 |
| TRCN000015: SMC3    | -3.272 | -3.366 | -0.46  | 1.55   |
| TRCN000016: SMC3    | -1.199 | -1.36  | -0.509 | 0.271  |
| TRCN000016: SMC3    | -1.188 | -1.168 | -0.479 | 0.042  |
| TRCN000015: SMC4    | -0.02  | 0.076  | -0.188 | -0.151 |
| TRCN000015: SMC4    | -1.662 | -1.695 | 0.07   | 0.147  |
| TRCN000015: SMC4    | 0.954  | 0.702  | -0.775 | -0.717 |
| TRCN000015: SMC4    | -0.521 | -0.482 | -0.397 | -0.335 |
| TRCN000004: SMOX    | -0.771 | -0.63  | -1.098 | -1.062 |
| TRCN000004: SMOX    | 1.684  | 1.632  | -0.773 | -0.729 |
| TRCN000004: SMOX    | 0.588  | 0.622  | 1.262  | 1.506  |
| TRCN000004: SMOX    | 1.022  | 1.032  | 0.291  | 0.352  |
| TRCN000004: SMOX    | -1.656 | -1.516 | 0.07   | 0.133  |
| TRCN000004: SND1    | -0.951 | -1.035 | 1.2    | 1.389  |
| TRCN000004: SND1    | -0.636 | -0.693 | 1.608  | 1.732  |
| TRCN000012: SPTY2D1 | 1.12   | 1.241  | 0.692  | 0.757  |
| TRCN000012: SPTY2D1 | 0.341  | 0.219  | -0.611 | -0.61  |
| TRCN000013: SPTY2D1 | -0.678 | -0.664 | 0.252  | 0.3    |
| TRCN000011: SS18    | -2.165 | -2.159 | 0.467  | 0.49   |
| TRCN000011: SS18    | 0.106  | 0.064  | -0.065 | -0.024 |
| TRCN000011: SS18    | -3.187 | -3.181 | 1.544  | 1.577  |
| TRCN000011: SS18    | -1.467 | -1.395 | -0.651 | -0.523 |
| TRCN000010: SS18L1  | 1.276  | 0.964  | -0.88  | -0.838 |
| TRCN000010: SS18L1  | -0.194 | -0.315 | 0.419  | 0.437  |
| TRCN000010: SS18L1  | 0.49   | 0.342  | 0.802  | 0.879  |
| TRCN000014: STAG1   | -1.2   | -0.913 | 1.295  | 1.344  |
| TRCN000014: STAG1   | 1.302  | 1.546  | 1.014  | 1.083  |
| TRCN000014: STAG1   | 0.398  | 0.43   | -0.445 | -0.359 |
| TRCN000015: STAG2   | -3.187 | -3.173 | 1.969  | 2.22   |
| TRCN000015: STAG2   | 0.037  | -0.051 | 0.306  | 0.351  |



|                    |        |        |        |        |
|--------------------|--------|--------|--------|--------|
| TRCN000015:STAG2   | 1.575  | 1.668  | -0.029 | -0.021 |
| TRCN000015:STAG2   | -0.564 | -0.423 | -0.71  | -0.534 |
| TRCN000013:STAG3   | -0.159 | -0.095 | 1.267  | 1.442  |
| TRCN000013:STAG3   | -0.044 | -0.173 | -0.609 | -0.555 |
| TRCN000006:STAG3L1 | -1.079 | -0.743 | -0.618 | -0.618 |
| TRCN000006:STAG3L1 | -0.358 | -0.353 | 0.005  | 0.209  |
| TRCN000006:STAG3L1 | 0.655  | 0.673  | 0.995  | 1.288  |
| TRCN000006:STAG3L1 | 0.4    | 0.291  | 0.602  | 0.736  |
| TRCN000006:STAG3L1 | -0.766 | -0.813 | -0.322 | -0.222 |
| TRCN000003:SUDES   | 0.813  | 0.975  | 1.383  | 1.384  |
| TRCN000003:SUDES   | 0.263  | 0.043  | 1.526  | 1.613  |
| TRCN000003:SUDES   | 1.224  | 1.215  | -0.465 | -0.437 |
| TRCN000003:SUDES   | 0.002  | -0.043 | 1.464  | 1.516  |
| TRCN000015:SU39H1  | -0.712 | -0.961 | 0.932  | 0.951  |
| TRCN000015:SU39H1  | -0.434 | -0.337 | 0.635  | 0.729  |
| TRCN000015:SU39H1  | 0.671  | 0.765  | 0.908  | 1.108  |
| TRCN000000:SU39H2  | -0.335 | -0.379 | 0.066  | 0.176  |
| TRCN000000:SU39H2  | -0.783 | -0.698 | -1.038 | -1.036 |
| TRCN000000:SU39H2  | -0.08  | -0.088 | 0.975  | 1.087  |
| TRCN000001:SU39H2  | 0.123  | 0.103  | -0.752 | -0.661 |
| TRCN000012:SU420H1 | 1.836  | 1.864  | 1.811  | 1.968  |
| TRCN000013:SU420H1 | 0.482  | 0.585  | 2.053  | 2.197  |
| TRCN000013:SU420H1 | 1.229  | 1.15   | 0.326  | 0.413  |
| TRCN000014:SU420H2 | -0.209 | -0.284 | -0.389 | -0.309 |
| TRCN000014:SU420H2 | 1.31   | 1.508  | 1.426  | 1.599  |
| TRCN000014:SU420H2 | 0.722  | 0.535  | -0.697 | -0.598 |
| TRCN000014:SU420H2 | -0.689 | -0.721 | 0.463  | 0.526  |
| TRCN000003:SUZ12   | -0.869 | -0.755 | -0.675 | -0.665 |
| TRCN000003:SUZ12   | -0.136 | -0.145 | -0.937 | -0.894 |
| TRCN000015:SYCP1   | 0.87   | 1.038  | -0.071 | -0.07  |
| TRCN000015:SYCP1   | 0.633  | 0.734  | 1.103  | 1.121  |
| TRCN000015:SYCP1   | 0.754  | 0.812  | 0.755  | 0.903  |
| TRCN000015:SYCP1   | -0.452 | -0.202 | -0.889 | -0.827 |
| TRCN000000:TAF1    | -0.402 | -0.437 | 1.406  | 1.485  |
| TRCN000000:TAF1    | 1.542  | 1.497  | 1.383  | 1.649  |
| TRCN000000:TAF1    | -0.705 | -0.624 | -0.762 | -0.235 |
| TRCN000007:TDRD3   | 1.4    | 1.378  | 0.599  | 0.602  |
| TRCN000007:TDRD3   | -0.327 | -0.467 | 0.864  | 1.484  |
| TRCN000007:TDRD3   | -2.201 | -2.337 | -0.746 | -0.441 |
| TRCN000014:THUMPD2 | -0.738 | -0.703 | 0.493  | 0.494  |
| TRCN000014:THUMPD2 | -1.109 | -1.121 | 1.084  | 1.167  |

|                    |        |       |        |       |
|--------------------|--------|-------|--------|-------|
| TRCN000014\THUMPD2 | 0.998  | 0.833 | 0.868  | 1.023 |
| TRCN000014\THUMPD2 | -0.142 | 0.064 | 0.711  | 0.916 |
| TRCN000015\THUMPD2 | -0.125 | 0.006 | -0.102 | 0.014 |
