# Supplementary material
Source: PubMed Central journal article supplement (PMC4086945)
Supplement: NIHMS601620-supplement-supplemental_table_3.pdf [file NIHMS601620-supplement-supplemental_table_3.pdf]

| GeneID | Symbol    | Description       | sumSignal_D | sumSignal_KOPT-K1_Persister |
|--------|-----------|-------------------|-------------|-----------------------------|
| 124540 | MSI2      | musashi hom       | 81513.4648  | 178855.522                  |
| 57521  | RPTOR     | regulatory as     | 2048.3951   | 117624.163                  |
| 23274  | CLEC16A   | C-type lectin     | 3295.0673   | 93395.3289                  |
| 1021   | CDK6      | cyclin-depend     | 12089.1486  | 75544.6162                  |
| 2120   | ETV6      | ets variant 6     | 9623.3874   | 59747.6282                  |
| 84959  | UBASH3B   | ubiquitin asso    | 16469.9108  | 49582.5341                  |
| 598    | BCL2L1    | BCL2-like 1       | 15177.5678  | 37678.3753                  |
| 83696  | TRAPPC9   | trafficking pro   | 27863.1476  | 19971.9061                  |
| 596    | BCL2      | B-cell CLL/lyn    | 5893.7709   | 39567.4996                  |
| 861    | RUNX1     | runt-related t    | 2402.9077   | 37066.5038                  |
| 26157  | GIMAP2    | GTPase, IMAF      | 1094.7383   | 37643.4777                  |
| 9846   | GAB2      | GRB2-associa      | 9896.5067   | 27512.1179                  |
| 10587  | TXNRD2    | thioredoxin re    | 2829.3175   | 33315.5915                  |
| 256987 | SERINC5   | serine incorp     | 1478.1907   | 32590.8844                  |
| 8821   | INPP4B    | inositol polyp    | 15935.8809  | 16848.5695                  |
| 10123  | ARL4C     | ADP-ribosylat     | 14572.5451  | 18196.1991                  |
| 84636  | GPR174    | G protein-cou     | 5062.2038   | 26981.0924                  |
| 11217  | AKAP2     | PALMA kinase (PRK | 11203.7717  | 19883.4989                  |
| 1803   | DPP4      | dipeptidyl-pe     | 17644.6857  | 11968.1376                  |
| 3659   | IRF1      | interferon re     | 9295.5537   | 18099.0673                  |
| 1523   | CUX1      | cut-like home     | 9339.4156   | 17393.554                   |
| 5583   | PRKCH     | protein kinas     | 6458.0969   | 20045.7727                  |
| 678    | ZFP36L2   | zinc finger pro   | 6562.5516   | 19111.0982                  |
| 8651   | SOCS1     | suppressor of     | 11109.7173  | 13987.5465                  |
| 84937  | ZNRF1     | zinc and ring     | 5226.7989   | 19832.3157                  |
| 71     | ACTG1     | actin, gamma      | 2711.2974   | 21249.159                   |
| 10320  | IKZF1     | IKAROS famil      | 2293.0269   | 20644.2669                  |
| 29969  | MDFIC     | MyoD family       | 847.3935    | 21799.378                   |
| 753    | C18orf1   | chromosome        | 6538.5857   | 15940.0682                  |
| 50515  | CHST11    | carbohydrate      | 11248.9902  | 11064.871                   |
| 7764   | ZNF217    | zinc finger pro   | 10583.827   | 11698.8444                  |
| 197370 | NSMCE1    | non-SMC eler      | 2872.7272   | 18592.8686                  |
| 64092  | SAMSN1    | SAM domain,       | 1899.6265   | 19481.5947                  |
| 7490   | WT1       | Wilms tumor       | 9727.3899   | 11628.4676                  |
| 1603   | DAD1      | defender aga      | 1151.2614   | 20033.5586                  |
| 57178  | ZMIZ1     | zinc finger, M    | 3926.3168   | 16824.1412                  |
| 140688 | C20orf112 | chromosome        | 4099.5034   | 16172.7189                  |
| 2776   | GNAQ      | guanine nucle     | 1512.1045   | 18487.5942                  |
| 896    | CCND3     | cyclin D3         | 18736.2587  | 1159.7641                   |
| 26112  | CCDC69    | coiled-coil do    | 9170.2987   | 10668.2015                  |

|        |          |                |            |            |
|--------|----------|----------------|------------|------------|
| 79621  | RNASEH2B | ribonuclease   | 10309.8032 | 9428.1728  |
| 8464   | SUPT3H   | suppressor of  | 3593.9611  | 15823.7428 |
| 152002 | C3orf21  | chromosome     | 1716.944   | 17451.7167 |
| 860    | RUNX2    | runt-related t | 2436.3694  | 16568.2253 |
| 25816  | TNFAIP8  | tumor necros   | 880.4029   | 18012.9866 |
| 9844   | ELMO1    | engulfment a   | 1215.4715  | 17490.6856 |
| 8832   | CD84     | CD84 molecu    | 1899.1743  | 16565.8987 |
| 961    | CD47     | CD47 molecu    | 693.6508   | 17700.0713 |
| 2113   | ETS1     | v-ets erythrol | 3521.6118  | 14648.2747 |
| 23648  | SSBP3    | single strandε | 5962.5029  | 12203.115  |
| 10507  | SEMA4D   | sema domain    | 2747.9243  | 15143.8208 |
| 55187  | VPS13D   | vacuolar prot  | 4443.1635  | 13260.5129 |
| 9938   | ARHGAP25 | Rho GTPase a   | 13952.6004 | 3486.8537  |
| 399    | RHOH     | ras homolog γ  | 3597.5787  | 13800.2625 |
| 6894   | TARBP1   | TAR (HIV-1) R  | 3049.0791  | 13855.5172 |
| 10868  | USP20    | ubiquitin spe  | 378.4783   | 16266.9425 |
| 10801  | 9-Sep    | septin 9       | 8251.0079  | 8262.5924  |
| 9760   | TOX      | thymocyte se   | 2761.4899  | 13749.661  |
| 8379   | MAD1L1   | MAD1 mitotic   | 10038.0404 | 6464.2019  |
| 9922   | IQSEC1   | IQ motif and : | 7454.2591  | 8973.3408  |
| 138050 | HGSNAT   | heparan-alph   | 8838.8475  | 7422.1415  |
| 129787 | TMEM18   | transmembra    | 6451.7663  | 9616.6199  |
| 60481  | ELOVL5   | ELOVL fatty a  | 2499.6751  | 13515.2654 |
| 7253   | TSHR     | thyroid stimu  | 5210.5203  | 10642.6099 |
| 10659  | CELF2    | CUGBP, Elav-l  | 2075.5262  | 13423.95   |
| 2533   | FYB      | FYN binding p  | 7369.7005  | 8044.4824  |
| 11178  | LZTS1    | leucine zippe  | 4722.6134  | 10582.1207 |
| 55247  | NEIL3    | nei endonuck   | 7840.8768  | 6831.2086  |
| 5293   | PIK3CD   | phosphoinosi   | 4780.493   | 9681.1806  |
| 149951 | COMMD7   | COMM doma      | 1703.3784  | 12698.6612 |
| 1029   | CDKN2A   | cyclin-depend  | 318.3378   | 13670.5597 |
| 23787  | MTCH1    | mitochondria   | 2418.2819  | 11485.3874 |
| 5757   | PTMA     | prothymosin,   | 6146.9941  | 7508.8039  |
| 7494   | XBP1     | X-box binding  | 10376.2743 | 2975.6034  |
| 27132  | CPNE7    | copine VII     | 506.4465   | 12773.1094 |
| 64207  | IRF2BPL  | interferon reğ | 1666.2993  | 11360.9191 |
| 5588   | PRKCQ    | protein kinas  | 1858.4777  | 11021.8306 |
| 1453   | CSNK1D   | casein kinase  | 1156.2354  | 11704.0791 |
| 6482   | ST3GAL1  | ST3 beta-gala  | 683.2506   | 12143.7889 |
| 404636 | FAM45A   | family with se | 6793.6177  | 5839.5345  |
| 55257  | C20orf20 | chromosome     | 651.5976   | 11941.9644 |

|             |             |                 |           |            |
|-------------|-------------|-----------------|-----------|------------|
| 23048       | FNBP1       | formin bindin   | 5488.6137 | 7100.5018  |
| 3280        | HES1        | hairy and enf   | 5318.5923 | 7081.3081  |
| 9435        | CHST2       | carbohydrate    | 8789.5595 | 3566.5364  |
| 3838        | KPNA2       | karyopherin α   | 1009.2755 | 11331.2562 |
| 10228       | STX6        | syntaxin 6      | 872.7158  | 11466.1938 |
| 375449      | MAST4       | microtubule α   | 6884.5068 | 5281.7543  |
| 10451       | VAV3        | vav 3 guanine   | 3002.5042 | 9148.4101  |
| 9759        | HDAC4       | histone deace   | 8085.5084 | 3954.4815  |
| 79831       | JMJD5       | jumonji doma    | 2357.6892 | 9661.4052  |
| 8835        | SOCS2       | suppressor of   | 9591.7345 | 2304.9875  |
| 864         | RUNX3       | runt-related t  | 324.2162  | 11565.0701 |
| 9262        | STK17B      | serine/threor   | 3564.117  | 8250.9597  |
| 4154        | MBNL1       | muscleblind-l   | 932.8563  | 10733.3437 |
| 221150      | SKA3        | spindle and k   | 6531.803  | 5011.2977  |
| 83874       | TBC1D10A    | TBC1 domain     | 1188.7927 | 10296.5418 |
| 64115       | C10orf54    | chromosome      | 3170.2644 | 8295.1635  |
| 50650       | ARHGEF3     | Rho guanine i   | 4077.3463 | 7295.3467  |
| 91544       | UBXN11      | UBX domain p    | 1702.4741 | 9646.2829  |
| 54788       | DNAJB12     | DnaJ (Hsp40)    | 9983.7784 | 1331.344   |
| 113277      | TMEM106A    | transmembra     | 5239.4601 | 5998.9004  |
| 10767       | HBS1L       | HBS1-like (S. c | 4963.1754 | 6249       |
| 5292        | PIM1        | pim-1 oncoge    | 2183.5983 | 8974.5038  |
| 5465        | PPARA       | peroxisome p    | 4221.5931 | 6794.566   |
| 1843        | DUSP1       | dual specificit | 670.1372  | 10181.9614 |
| 359948      | IRF2BP2     | interferon reğ  | 466.6543  | 10365.7554 |
| 3937        | LCP2        | lymphocyte c    | 1763.0668 | 9059.4213  |
| 23151       | GRAMD4      | GRAM domai      | 3904.1597 | 6834.6983  |
| 6397 654434 | LINC00338 S | SEC14-like 1 (  | 2228.3645 | 8490.5902  |
| 4267        | CD99        | CD99 molecu     | 5994.6079 | 4636.73    |
| 81794       | ADAMTS10    | ADAM metall     | 1387.7538 | 9185.6344  |
| 4478        | MSN         | moesin          | 814.8362  | 9706.7721  |
| 55196       | C12orf35    | chromosome      | 6002.2951 | 4491.905   |
| 92106       | OXNAD1      | oxidoreducta    | 3027.3742 | 7383.7541  |
| 539         | ATP5O       | ATP synthase    | 5417.1685 | 4894.9724  |
| 6856        | SYPL1       | synaptophysi    | 543.9778  | 9719.5679  |
| 64969       | MRPS5       | mitochondria    | 2432.2996 | 7770.536   |
| 92255       | LMBRD2      | LMBR1 doma      | 8598.2855 | 1532.0054  |
| 3638        | INSIG1      | insulin induce  | 667.4241  | 9408.979   |
| 7832        | BTG2        | BTG family, r   | 3153.5337 | 6878.902   |
| 85318 85319 | BAGE2 BAGE  | B melanoma      | 5500.3705 | 4404.6609  |
| 84299       | MIEN1       | migration anc   | 2552.1285 | 7352.3463  |

|        |          |                 |           |           |
|--------|----------|-----------------|-----------|-----------|
| 9555   | H2AFY    | H2A histone f   | 2948.242  | 6937.6462 |
| 84892  | C3orf39  | chromosome      | 825.6886  | 9037.3195 |
| 8535   | CBX4     | chromobox h     | 462.1324  | 9335.1125 |
| 7038   | TG       | thyroglobulin   | 4195.8185 | 5533.0172 |
| 5660   | PSAP     | prosaposin      | 2198.9726 | 7438.427  |
| 4118   | MAL      | mal, T-cell dif | 739.3214  | 8808.1585 |
| 113451 | ADC      | arginine deca   | 1640.5249 | 7721.0978 |
| 5788   | PTPRC    | protein tyrosi  | 7572.2792 | 1760.5848 |
| 3676   | ITGA4    | integrin, alph  | 3540.1513 | 5716.2297 |
| 5575   | PRKAR1B  | protein kinas   | 3230.8572 | 5995.9922 |
| 952    | CD38     | CD38 molecu     | 3525.2292 | 5698.1992 |
| 11142  | PKIG     | protein kinas   | 587.8397  | 8626.1093 |
| 51218  | GLRX5    | glutaredoxin    | 3060.3838 | 6118.1339 |
| 11237  | RNF24    | ring finger pr  | 2522.7365 | 6646.8327 |
| 3727   | JUND     | jun D proto-o   | 2275.8438 | 6759.0868 |
| 1106   | CHD2     | chromodoma      | 5104.2569 | 3921.3289 |
| 84617  | TUBB6    | tubulin, beta   | 276.2846  | 8729.6388 |
| 3485   | IGFBP2   | insulin-like gr | 4766.4752 | 4212.724  |
| 6786   | STIM1    | stromal inter:  | 1491.7562 | 7436.1005 |
| 84532  | ACSS1    | acyl-CoA synt   | 1906.8614 | 7009.1864 |
| 8073   | PTP4A2   | protein tyrosi  | 2351.3587 | 6563.6601 |
| 970    | CD70     | CD70 molecu     | 1086.1468 | 7813.5764 |
| 4851   | NOTCH1   | notch 1         | 815.7406  | 8066.0026 |
| 10049  | DNAJB6   | DnaJ (Hsp40)    | 1979.6631 | 6874.8305 |
| 3903   | LAIR1    | leukocyte-ass   | 2362.6632 | 6490.9567 |
| 7029   | TFDP2    | transcription   | 8035.7681 | 761.3497  |
| 57161  | PELI2    | pellino homo    | 5602.1121 | 3192.5503 |
| 3482   | IGF2R    | insulin-like gr | 4622.2285 | 4111.5209 |
| 124935 | SLC43A2  | solute carrier  | 3999.5706 | 4612.8834 |
| 5193   | PEX12    | peroxisomal l   | 4236.063  | 4329.631  |
| 54899  | PXK      | PX domain cc    | 4053.8327 | 4487.8335 |
| 6470   | SHMT1    | serine hydrox   | 4296.6557 | 4203.418  |
| 9842   | PLEKHM1  | pleckstrin hor  | 1691.1695 | 6732.3319 |
| 10743  | RAI1     | retinoic acid i | 316.0769  | 8071.8187 |
| 8289   | ARID1A   | AT rich intera  | 3623.3532 | 4729.2088 |
| 157    | ADRBK2   | adrenergic, b   | 748.8173  | 7583.8337 |
| 3938   | LCT      | lactase         | 2245.9997 | 6081.4914 |
| 201266 | SLC39A11 | solute carrier  | 1215.0193 | 7081.3081 |
| 4602   | MYB      | v-myb myelol    | 3280.5974 | 4935.6863 |
| 26147  | PHF19    | PHD finger pr   | 250.0579  | 7881.6268 |
| 57181  | SLC39A10 | solute carrier  | 2573.3811 | 5497.5379 |

|           |              |                |           |           |
|-----------|--------------|----------------|-----------|-----------|
| 613       | BCR          | breakpoint cl  | 1842.6512 | 6226.8981 |
| 57713     | SFMBT2       | Scm-like with  | 6272.7013 | 1750.6971 |
| 147339    | C18orf25     | chromosome     | 649.7889  | 7174.3684 |
| 163486    | DENND1B      | DENN/MADD      | 4566.6098 | 3176.8464 |
| 156       | ADRBK1       | adrenergic, b  | 1970.1673 | 5762.1782 |
| 374819    | LRRC37A3     | leucine rich r | 938.7347  | 6691.6181 |
| 6903      | TBCC         | tubulin foldin | 3823.2187 | 3702.0556 |
| 7456      | WIPF1        | WAS/WASL ir    | 3747.7039 | 3766.0345 |
| 9679      | FAM53B       | family with se | 610.9011  | 6870.7591 |
| 7128      | TNFAIP3      | tumor necros   | 5805.1426 | 1670.4326 |
| 4289      | MKLN1        | muskelin 1, ir | 4102.6687 | 3315.8552 |
| 57216     | VANGL2       | vang-like 2 (v | 1991.4199 | 5380.0493 |
| 399687    | MYO18A       | myosin XVIII   | 2583.7814 | 4770.5042 |
| 80709     | AKNA         | AT-hook tran   | 2264.5392 | 5087.491  |
| 23635     | SSBP2        | single-strand  | 6503.3153 | 828.2368  |
| 81558     | FAM117A      | family with se | 2182.6939 | 5068.2972 |
| 7852      | CXCR4        | chemokine (C   | 1524.3135 | 5628.404  |
| 54880     | BCOR         | BCL6 corepre   | 2724.4107 | 4426.7627 |
| 80325     | ABTB1        | ankyrin repea  | 5296.8875 | 1759.4215 |
| 196528    | ARID2        | AT rich intera | 1727.3442 | 5318.3969 |
| 8459      | TPST2        | tyrosylproteir | 3492.6719 | 3515.3533 |
| 6503      | SLA          | Src-like-adapt | 2877.7012 | 4078.3681 |
| 27245     | AHDC1        | AT hook, DNA   | 2263.6349 | 4689.0765 |
| 8871      | SYNJ2        | synaptojanin   | 3298.6849 | 3653.7804 |
| 11118     | BTN3A2       | butyrophilin,  | 369.4346  | 6507.8239 |
| 51582     | AZIN1        | antizyme inhi  | 1590.7846 | 5283.4991 |
| 5579      | PRKCB        | protein kinas  | 4498.7821 | 2298.5898 |
| 3930      | LBR          | lamin B recep  | 2494.7011 | 4297.0598 |
| 257177    | C1orf192     | chromosome     | 3428.0096 | 3357.7324 |
| 22795     | NID2         | nidogen 2 (os  | 5043.2121 | 1740.8095 |
| 51564     | HDAC7        | histone deace  | 1429.3547 | 5350.9679 |
| 197322    | ACSF3        | acyl-CoA synt  | 1787.4847 | 4978.7267 |
| 51321     | AMZ2         | archaelysin fa | 926.0736  | 5838.3712 |
| 54758     | KLHDC4       | kelch domain   | 4329.6652 | 2432.9455 |
| 8648      | NCOA1        | nuclear recep  | 778.6615  | 5976.7985 |
| 6772      | STAT1        | signal transdu | 1524.3135 | 5223.01   |
| 100130872 | 1LOC10013087 | hypothetical   | 2258.2087 | 4467.4766 |
| 3702      | ITK          | IL2-inducible  | 2278.5569 | 4381.3958 |
| 7114      | TMSB4X       | thymosin bet   | 3355.2079 | 3301.8963 |
| 11320     | MGAT4A       | mannosyl (alp  | 749.7217  | 5899.4422 |
| 201176    | ARHGAP27     | Rho GTPase a   | 903.9165  | 5737.7499 |

|        |            |                     |           |           |
|--------|------------|---------------------|-----------|-----------|
| 7067   | THRA       | thyroid horm        | 1065.3464 | 5569.078  |
| 57332  | CBX8       | chromobox h         | 2094.0658 | 4540.1799 |
| 23081  | KDM4C      | lysine (K)-spe      | 1077.1031 | 5508.5888 |
| 23013  | SPEN       | spen homolo         | 3258.4405 | 3254.7844 |
| 6793   | STK10      | serine/threor       | 1685.7433 | 4815.2895 |
| 7402   | UTRN       | utrophin            | 2620.8605 | 3862.0031 |
| 3454   | IFNAR1     | interferon (al      | 2378.4897 | 4102.2149 |
| 27086  | FOXP1      | forkhead box        | 3822.3143 | 2655.7087 |
| 5880   | RAC2       | ras-related C       | 2877.249  | 3593.8728 |
| 10311  | DSCR3      | Down syndro         | 1279.6818 | 5181.1328 |
| 22800  | RRAS2      | related RAS v       | 1567.271  | 4868.2176 |
| 2745   | GLRX       | glutaredoxin        | 5258.4519 | 1156.2744 |
| 780    | DDR1       | discoidin don       | 4680.5603 | 1729.177  |
| 699    | BUB1       | budding unin        | 5500.3706 | 855.5732  |
| 408    | ARRB1      | arrestin, beta      | 1435.6854 | 4907.7682 |
| 5989   | RFX1       | regulatory fa       | 503.2812  | 5840.1162 |
| 2885   | GRB2       | growth factor       | 959.0831  | 5381.7942 |
| 10016  | 57491 AHRR | PDCD6 aryl-hydrocar | 2406.9773 | 3888.1761 |
| 10664  | CTCF       | CCCTC-bindin        | 954.109   | 5339.3354 |
| 80146  | UXS1       | UDP-glucuror        | 1099.7123 | 5184.041  |
| 22856  | CHSY1      | chondroitin s       | 368.9824  | 5890.7177 |
| 10213  | PSMD14     | proteasome (        | 2539.4673 | 3695.6577 |
| 493    | ATP2B4     | ATPase, Ca++        | 563.4217  | 5671.4444 |
| 51123  | ZNF706     | zinc finger pr      | 4093.625  | 2082.2245 |
| 54997  | TESC       | tescalcin           | 1872.0432 | 4252.8563 |
| 23092  | ARHGAP26   | Rho GTPase a        | 3062.6446 | 3009.3377 |
| 3185   | HNRNPF     | heterogeneo         | 1580.3843 | 4480.854  |
| 6711   | SPTBN1     | spectrin, beta      | 959.9874  | 5095.0521 |
| 56984  | PSMG2      | proteasome (        | 4913.4352 | 1120.7951 |
| 639    | PRDM1      | PR domain cc        | 4019.9189 | 2005.4498 |
| 2590   | GALNT2     | UDP-N-acetyl        | 5471.4307 | 551.3823  |
| 124565 | SLC38A10   | solute carrier      | 794.4879  | 5181.7145 |
| 10188  | TNK2       | tyrosine kina       | 598.2399  | 5376.5595 |
| 57540  | PTCHD2     | patched dom         | 640.7452  | 5331.1926 |
| 10010  | TANK       | TRAF family n       | 398.8266  | 5563.2617 |
| 3133   | HLA-E      | major histocc       | 1238.9851 | 4720.4843 |
| 23199  | KIAA0182   | KIAA0182            | 2630.3564 | 3328.651  |
| 2769   | GNA15      | guanine nucle       | 2492.4402 | 3441.4867 |
| 8611   | PPAP2A     | phosphatidic        | 4351.8222 | 1563.9948 |
| 1112   | FOXN3      | forkhead box        | 2808.0648 | 3107.0511 |
| 5093   | PCBP1      | poly(rC) bindi      | 2663.3658 | 3228.6112 |

|        |          |                 |           |           |
|--------|----------|-----------------|-----------|-----------|
| 963    | CD53     | CD53 molecu     | 2762.3942 | 3045.3987 |
| 6653   | SORL1    | sortilin-relate | 2652.5134 | 3152.418  |
| 80821  | DDHD1    | DDHD domain     | 3132.7332 | 2665.5963 |
| 6304   | SATB1    | SATB homeok     | 1964.2888 | 3830.595  |
| 51278  | IER5     | immediate ea    | 1296.4126 | 4483.7621 |
| 51621  | KLF13    | Kruppel-like f  | 2525.4496 | 3240.2437 |
| 353088 | ZNF429   | zinc finger pr  | 841.5151  | 4853.6769 |
| 25804  | LSM4     | LSM4 homolc     | 1640.977  | 4053.9399 |
| 2114   | ETS2     | v-ets erythrol  | 391.5916  | 5284.6625 |
| 374655 | ZNF710   | zinc finger pr  | 963.6049  | 4690.8213 |
| 91748  | C14orf43 | chromosome      | 370.339   | 5279.4279 |
| 286336 | FAM78A   | family with se  | 2183.5983 | 3437.9968 |
| 7528   | YY1      | YY1 transcrip   | 2121.649  | 3487.4352 |
| 283385 | MORN3    | MORN repeat     | 1886.9653 | 3710.1983 |
| 55819  | RNF130   | ring finger pr  | 655.6673  | 4883.9215 |
| 23499  | MACF1    | microtubule-i   | 1381.4232 | 4151.6531 |
| 3455   | IFNAR2   | interferon (al  | 2118.4837 | 3367.0383 |
| 6509   | SLC1A4   | solute carrier  | 2270.8698 | 3184.9892 |
| 9258   | MFHAS1   | malignant fib   | 775.4962  | 4634.4035 |
| 10163  | WASF2    | WAS protein     | 264.98    | 5119.4804 |
| 92906  | HNRPLL   | heterogeneou    | 567.4914  | 4796.0959 |
| 3688   | ITGB1    | integrin, beta  | 561.613   | 4791.4428 |
| 7150   | TOP1     | topoisomeras    | 661.5457  | 4687.9132 |
| 8743   | TNFSF10  | tumor necros    | 1999.5592 | 3268.7434 |
| 54518  | APBB1IP  | amyloid beta    | 2772.7944 | 2478.894  |
| 6184   | RPN1     | ribophorin I    | 1658.16   | 3589.8016 |
| 23533  | PIK3R5   | phosphoinosi    | 2784.5513 | 2453.3024 |
| 10930  | APOBEC2  | apolipoprotei   | 2658.3918 | 2513.2101 |
| 53347  | UBASH3A  | ubiquitin assc  | 2484.3008 | 2654.5454 |
| 64399  | HHIP     | hedgehog int    | 2145.1626 | 2962.8076 |
| 129642 | MBOAT2   | membrane bo     | 545.3343  | 4558.792  |
| 63977  | PRDM15   | PR domain cc    | 490.1678  | 4610.5568 |
| 6733   | SRPK2    | SRSF protein    | 3958.4218 | 1064.9589 |
| 7046   | TGFBR1   | transforming    | 593.7181  | 4427.9259 |
| 64750  | SMURF2   | SMAD specifi    | 373.9565  | 4599.5059 |
| 822    | CAPG     | capping prote   | 1868.8779 | 3091.3473 |
| 2313   | FLI1     | Friend leuken   | 649.3368  | 4277.2846 |
| 8869   | ST3GAL5  | ST3 beta-gala   | 720.3297  | 4181.8977 |
| 29904  | EEF2K    | eukaryotic ek   | 243.7274  | 4656.5053 |
| 90933  | TRIM41   | tripartite mot  | 2280.8179 | 2592.3113 |
| 8439   | NSMAF    | neutral sphin   | 1819.1376 | 3037.256  |

|           |              |                |           |           |
|-----------|--------------|----------------|-----------|-----------|
| 2752      | GLUL         | glutamate-an   | 1236.272  | 3599.6892 |
| 56829     | ZC3HAV1      | zinc finger CC | 1233.559  | 3561.8834 |
| 7760      | ZNF213       | zinc finger pr | 1569.5319 | 3225.703  |
| 9019      | MPZL1        | myelin protei  | 1957.5061 | 2832.5233 |
| 55893     | ZNF395       | zinc finger pr | 1346.1528 | 3429.8541 |
| 9948      | WDR1         | WD repeat dc   | 2000.9157 | 2759.2383 |
| 55843     | ARHGAP15     | Rho GTPase a   | 549.8562  | 4169.6836 |
| 3607      | FOXP2        | forkhead box   | 893.0641  | 3820.1258 |
| 55626     | AMBRA1       | autophagy/be   | 4034.3888 | 604.3104  |
| 1788      | DNMT3A       | DNA (cytosine  | 1006.1102 | 3629.9337 |
| 7434      | VIPR2        | vasoactive int | 1902.7917 | 2728.412  |
| 6659      | SOX4         | SRY (sex dete  | 2095.8745 | 2528.914  |
| 79991     | OBFC1        | oligonucleoti  | 944.1609  | 3621.791  |
| 9830      | TRIM14       | tripartite mot | 1605.2545 | 2955.8281 |
| 57410     | SCYL1        | SCY1-like 1 (S | 1522.5048 | 3033.1845 |
| 3965      | LGALS9       | lectin, galact | 2864.1357 | 1675.6672 |
| 27067     | STAU2        | staufen, RNA   | 3891.0462 | 647.3508  |
| 1316      | KLF6         | Kruppel-like f | 3657.7192 | 864.8793  |
| 23210     | JMJD6        | jumonji doma   | 1210.9497 | 3262.9271 |
| 10397     | NDRG1        | N-myc downs    | 676.9199  | 3787.5548 |
| 4627      | MYH9         | myosin, heav   | 1182.4621 | 3272.8149 |
| 1729      | DIAPH1       | diaphanous h   | 594.1702  | 3831.1767 |
| 9232      | PTTG1        | pituitary tum  | 1812.355  | 2611.505  |
| 340061    | TMEM173      | transmembra    | 1316.3086 | 3082.0412 |
| 140609    | NEK7         | NIMA (never    | 1399.5107 | 2992.4706 |
| 23060     | ZNF609       | zinc finger pr | 2419.6385 | 1966.4808 |
| 284001    | CCDC57       | coiled-coil do | 600.0486  | 3754.402  |
| 54980     | C2orf42      | chromosome     | 1742.2663 | 2566.7197 |
| 283149    | BCL9L        | B-cell CLL/lyn | 1574.506  | 2730.7385 |
| 23293     | SMG6         | smg-6 homolo   | 640.293   | 3634.005  |
| 51816     | CECR1        | cat eye syndr  | 3558.6909 | 702.0237  |
| 22901     | ARSG         | arylsulfatase  | 755.6001  | 3502.5574 |
| 29967     | LRP12        | low density li | 1708.3525 | 2530.0773 |
| 6001      | RGS10        | regulator of G | 1733.6747 | 2495.1796 |
| 7570      | ZNF22        | zinc finger pr | 1978.3066 | 2238.6822 |
| 100506688 | LOC100506688 | hypothetical   | 957.2743  | 3253.0396 |
| 11274     | USP18        | ubiquitin spe  | 2560.72   | 1628.5554 |
| 5987      | TRIM27       | tripartite mot | 1260.69   | 2925.002  |
| 3682      | ITGAE        | integrin, alph | 237.849   | 3939.941  |
| 30011     | SH3KBP1      | SH3-domain l   | 2114.8662 | 2060.7043 |
| 128710    | C20orf94     | chromosome     | 2263.1827 | 1900.7568 |



|             |             |                |           |           |
|-------------|-------------|----------------|-----------|-----------|
| 57018       | CCNL1       | cyclin L1      | 878.142   | 3275.1413 |
| 7625        | ZNF74       | zinc finger pr | 2647.9916 | 1491.2915 |
| 6727        | SRP14       | signal recogn  | 2089.996  | 2038.6025 |
| 23117       | NPIPL3      | nuclear pore   | 689.5811  | 3382.7423 |
| 23370       | ARHGEF18    | Rho/Rac guar   | 1566.3666 | 2498.0877 |
| 8140        | SLC7A5      | solute carrier | 1376.4491 | 2669.0861 |
| 5606        | MAP2K3      | mitogen-activ  | 446.7581  | 3597.3627 |
| 152687 2554 | ZNF595 ZNF7 | zinc finger pr | 1710.1612 | 2333.4874 |
| 11214       | AKAP13      | A kinase (PRK  | 928.3345  | 3115.1939 |
| 7316        | UBC         | ubiquitin C    | 1762.6146 | 2278.2328 |
| 169270      | ZNF596      | zinc finger pr | 638.9365  | 3400.7728 |
| 54541       | DDIT4       | DNA-damage     | 2384.3681 | 1643.6777 |
| 1031        | CDKN2C      | cyclin-depend  | 2651.1569 | 1338.3236 |
| 8031        | NCOA4       | nuclear recep  | 284.8761  | 3663.6682 |
| 55144       | LRRC8D      | leucine rich r | 2610.4603 | 1309.8239 |
| 801         | CALM1       | calmodulin 1   | 2001.8201 | 1918.2057 |
| 6693        | SPN         | sialophorin    | 958.6309  | 2954.6649 |
| 150094      | SIK1        | salt-inducible | 2058.3431 | 1853.0634 |
| 51225       | ABI3        | ABI family, m  | 1468.2426 | 2432.3639 |
| 23265       | EXOC7       | exocyst comp   | 1079.3641 | 2818.5642 |
| 6904        | TBCD        | tubulin foldin | 804.8882  | 3079.7147 |
| 100532731 2 | BMI1 COMMB  | BMI1 polycor   | 1838.5816 | 2036.8576 |
| 54496       | PRMT7       | protein argini | 3018.7827 | 845.6856  |
| 3904        | LAIR2       | leukocyte-ass  | 1196.932  | 2645.821  |
| 6785        | ELOVL4      | ELOVL fatty a  | 2818.9173 | 1006.2146 |
| 80223       | RAB11FIP1   | RAB11 family   | 928.7867  | 2895.3389 |
| 6627        | SNRPA1      | small nuclear  | 3461.9234 | 360.6087  |
| 23367       | LARP1       | La ribonucleo  | 1837.225  | 1966.4807 |
| 27341       | RRP7A       | ribosomal RN   | 573.3698  | 3207.091  |
| 7738        | ZNF184      | zinc finger pr | 1186.5317 | 2585.9134 |
